# Supplementary material
Source: Research Square preprint supplement (doi:10.21203/rs.3.rs-10223024/v1)

**Supplementary Table S1**

**Descriptive Statistics of Numerical Predictors**

| statistic | value |
| --- | --- |
| goals_scored_last_4y_mean | 84.58333333 |
| goals_scored_last_4y_sd | 23.73177633 |
| goals_scored_last_4y_median | 83.5 |
| goals_scored_last_4y_min | 28 |
| goals_scored_last_4y_max | 156 |
| goals_received_last_4y_mean | 44.57291667 |
| goals_received_last_4y_sd | 13.60800872 |
| goals_received_last_4y_median | 42.5 |
| goals_received_last_4y_min | 19 |
| goals_received_last_4y_max | 95 |
| wins_last_4y_mean | 26.046875 |
| wins_last_4y_sd | 6.912534379 |
| wins_last_4y_median | 25 |
| wins_last_4y_min | 8 |
| wins_last_4y_max | 48 |
| losses_last_4y_mean | 11.05208333 |
| losses_last_4y_sd | 4.745612008 |
| losses_last_4y_median | 10.5 |
| losses_last_4y_min | 2 |
| losses_last_4y_max | 30 |
| draws_last_4y_mean | 11.80208333 |
| draws_last_4y_sd | 3.496055494 |
| draws_last_4y_median | 12 |
| draws_last_4y_min | 4 |
| draws_last_4y_max | 23 |
| world_cup_titles_before_mean | 0.427083333 |
| world_cup_titles_before_sd | 1.085311659 |
| world_cup_titles_before_median | 0 |
| world_cup_titles_before_min | 0 |
| world_cup_titles_before_max | 5 |
| squad_total_market_value_eur_mean | 322411093.8 |
| squad_total_market_value_eur_sd | 321764770.8 |
| squad_total_market_value_eur_median | 217940000 |
| squad_total_market_value_eur_min | 6270000 |
| squad_total_market_value_eur_max | 1.62E+09 |
| fifa_rank_pre_tournament_mean | 23.54166667 |
| fifa_rank_pre_tournament_sd | 18.21449665 |
| fifa_rank_pre_tournament_median | 20 |
| fifa_rank_pre_tournament_min | 1 |
| fifa_rank_pre_tournament_max | 105 |
| fifa_points_pre_tournament_mean | 954.1654688 |
| fifa_points_pre_tournament_sd | 367.5446094 |
| fifa_points_pre_tournament_median | 824 |
| fifa_points_pre_tournament_min | 285 |
| fifa_points_pre_tournament_max | 1841.3 |
| squad_avg_age_mean | 27.24963542 |
| squad_avg_age_sd | 1.092350543 |
| squad_avg_age_median | 27.225 |
| squad_avg_age_min | 23.92 |
| squad_avg_age_max | 29.78 |
| world_cup_participations_before_mean | 5.625 |
| world_cup_participations_before_sd | 5.548925654 |
| world_cup_participations_before_median | 4 |
| world_cup_participations_before_min | 0 |
| world_cup_participations_before_max | 21 |
| groups_passed_before_mean | 3.572916667 |
| groups_passed_before_sd | 4.584848234 |
| groups_passed_before_median | 1 |
| groups_passed_before_min | 0 |
| groups_passed_before_max | 19 |
| round16_before_mean | 2.244791667 |
| round16_before_sd | 2.701070945 |
| round16_before_median | 1 |
| round16_before_min | 0 |
| round16_before_max | 11 |
| quarterfinals_before_mean | 2.223958333 |
| quarterfinals_before_sd | 3.525056007 |
| quarterfinals_before_median | 1 |
| quarterfinals_before_min | 0 |
| quarterfinals_before_max | 16 |
| semifinals_before_mean | 1.348958333 |
| semifinals_before_sd | 2.618520216 |
| semifinals_before_median | 0 |
| semifinals_before_min | 0 |
| semifinals_before_max | 13 |
| finals_before_mean | 0.697916667 |
| finals_before_sd | 1.731263447 |
| finals_before_median | 0 |
| finals_before_min | 0 |
| finals_before_max | 8 |

**Supplementary Table S2**

**Full Predictive Performance of Competing Models Using the Youden Optimal Classification Threshold**

**Supplementary Table S2**

**Predictive Performance of Competing Models Using a Fixed 0.50 Classification Threshold**

**Supplementary Table S3**

**Combined Model Performance Across Classification Thresholds**

**Supplementary Table S4**

**Penalized Logistic Regression Coefficient Estimates**

| predictor | coefficient | outcome | model |
| --- | --- | --- | --- |
| semifinals_before | 0.000869 | finalist | elastic_net |
| squad_total_market_value_eur | 4.68E-10 | finalist | elastic_net |
| continentSouth America | 0 | finalist | elastic_net |
| continentOceania | 0 | finalist | elastic_net |
| continentNorth America | 0 | finalist | elastic_net |
| continentEurope | 0 | finalist | elastic_net |
| continentAsia | 0 | finalist | elastic_net |
| is_host1 | 0 | finalist | elastic_net |
| goals_scored_last_4y | 0 | finalist | elastic_net |
| goals_received_last_4y | 0 | finalist | elastic_net |
| wins_last_4y | 0 | finalist | elastic_net |
| losses_last_4y | 0 | finalist | elastic_net |
| draws_last_4y | 0 | finalist | elastic_net |
| world_cup_titles_before | 0 | finalist | elastic_net |
| fifa_rank_pre_tournament | 0 | finalist | elastic_net |
| fifa_points_pre_tournament | 0 | finalist | elastic_net |
| squad_avg_age | 0 | finalist | elastic_net |
| world_cup_participations_before | 0 | finalist | elastic_net |
| groups_passed_before | 0 | finalist | elastic_net |
| round16_before | 0 | finalist | elastic_net |
| quarterfinals_before | 0 | finalist | elastic_net |
| finals_before | 0 | finalist | elastic_net |
| finals_before | 0.008563 | finalist | lasso |
| squad_total_market_value_eur | 1.15E-09 | finalist | lasso |
| continentSouth America | 0 | finalist | lasso |
| continentOceania | 0 | finalist | lasso |
| continentNorth America | 0 | finalist | lasso |
| continentEurope | 0 | finalist | lasso |
| continentAsia | 0 | finalist | lasso |
| is_host1 | 0 | finalist | lasso |
| goals_scored_last_4y | 0 | finalist | lasso |
| goals_received_last_4y | 0 | finalist | lasso |
| wins_last_4y | 0 | finalist | lasso |
| losses_last_4y | 0 | finalist | lasso |
| draws_last_4y | 0 | finalist | lasso |
| world_cup_titles_before | 0 | finalist | lasso |
| fifa_rank_pre_tournament | 0 | finalist | lasso |
| fifa_points_pre_tournament | 0 | finalist | lasso |
| squad_avg_age | 0 | finalist | lasso |
| world_cup_participations_before | 0 | finalist | lasso |
| groups_passed_before | 0 | finalist | lasso |
| round16_before | 0 | finalist | lasso |
| quarterfinals_before | 0 | finalist | lasso |
| semifinals_before | 0 | finalist | lasso |
| continentEurope | 8.33E-38 | finalist | ridge |
| continentAsia | -7.17E-38 | finalist | ridge |
| continentNorth America | -7.09E-38 | finalist | ridge |
| is_host1 | -6.55E-38 | finalist | ridge |
| continentOceania | -6.52E-38 | finalist | ridge |
| world_cup_titles_before | 4.88E-38 | finalist | ridge |
| continentSouth America | 4.87E-38 | finalist | ridge |
| finals_before | 3.64E-38 | finalist | ridge |
| semifinals_before | 2.45E-38 | finalist | ridge |
| round16_before | 2.25E-38 | finalist | ridge |
| quarterfinals_before | 1.76E-38 | finalist | ridge |
| groups_passed_before | 1.24E-38 | finalist | ridge |
| losses_last_4y | -1.19E-38 | finalist | ridge |
| world_cup_participations_before | 1.00E-38 | finalist | ridge |
| wins_last_4y | 7.69E-39 | finalist | ridge |
| squad_avg_age | -7.12E-39 | finalist | ridge |
| draws_last_4y | -3.73E-39 | finalist | ridge |
| fifa_rank_pre_tournament | -3.21E-39 | finalist | ridge |
| goals_scored_last_4y | 2.01E-39 | finalist | ridge |
| goals_received_last_4y | -1.68E-39 | finalist | ridge |
| fifa_points_pre_tournament | 9.61E-41 | finalist | ridge |
| squad_total_market_value_eur | 2.40E-46 | finalist | ridge |
| world_cup_titles_before | 0.061448 | quarter_finalist | elastic_net |
| finals_before | 0.022984 | quarter_finalist | elastic_net |
| semifinals_before | 0.01639 | quarter_finalist | elastic_net |
| quarterfinals_before | 0.007114 | quarter_finalist | elastic_net |
| groups_passed_before | 0.002446 | quarter_finalist | elastic_net |
| fifa_rank_pre_tournament | -0.00027 | quarter_finalist | elastic_net |
| squad_total_market_value_eur | 9.40E-10 | quarter_finalist | elastic_net |
| continentSouth America | 0 | quarter_finalist | elastic_net |
| continentOceania | 0 | quarter_finalist | elastic_net |
| continentNorth America | 0 | quarter_finalist | elastic_net |
| continentEurope | 0 | quarter_finalist | elastic_net |
| continentAsia | 0 | quarter_finalist | elastic_net |
| is_host1 | 0 | quarter_finalist | elastic_net |
| goals_scored_last_4y | 0 | quarter_finalist | elastic_net |
| goals_received_last_4y | 0 | quarter_finalist | elastic_net |
| wins_last_4y | 0 | quarter_finalist | elastic_net |
| losses_last_4y | 0 | quarter_finalist | elastic_net |
| draws_last_4y | 0 | quarter_finalist | elastic_net |
| fifa_points_pre_tournament | 0 | quarter_finalist | elastic_net |
| squad_avg_age | 0 | quarter_finalist | elastic_net |
| world_cup_participations_before | 0 | quarter_finalist | elastic_net |
| round16_before | 0 | quarter_finalist | elastic_net |
| world_cup_titles_before | 0.006833 | quarter_finalist | lasso |
| squad_total_market_value_eur | 1.08E-09 | quarter_finalist | lasso |
| continentSouth America | 0 | quarter_finalist | lasso |
| continentOceania | 0 | quarter_finalist | lasso |
| continentNorth America | 0 | quarter_finalist | lasso |
| continentEurope | 0 | quarter_finalist | lasso |
| continentAsia | 0 | quarter_finalist | lasso |
| is_host1 | 0 | quarter_finalist | lasso |
| goals_scored_last_4y | 0 | quarter_finalist | lasso |
| goals_received_last_4y | 0 | quarter_finalist | lasso |
| wins_last_4y | 0 | quarter_finalist | lasso |
| losses_last_4y | 0 | quarter_finalist | lasso |
| draws_last_4y | 0 | quarter_finalist | lasso |
| fifa_rank_pre_tournament | 0 | quarter_finalist | lasso |
| fifa_points_pre_tournament | 0 | quarter_finalist | lasso |
| squad_avg_age | 0 | quarter_finalist | lasso |
| world_cup_participations_before | 0 | quarter_finalist | lasso |
| groups_passed_before | 0 | quarter_finalist | lasso |
| round16_before | 0 | quarter_finalist | lasso |
| quarterfinals_before | 0 | quarter_finalist | lasso |
| semifinals_before | 0 | quarter_finalist | lasso |
| finals_before | 0 | quarter_finalist | lasso |
| is_host1 | 0.161145 | quarter_finalist | ridge |
| continentSouth America | 0.099539 | quarter_finalist | ridge |
| continentOceania | -0.08983 | quarter_finalist | ridge |
| continentAsia | -0.08272 | quarter_finalist | ridge |
| continentNorth America | -0.0588 | quarter_finalist | ridge |
| continentEurope | 0.052309 | quarter_finalist | ridge |
| world_cup_titles_before | 0.040561 | quarter_finalist | ridge |
| finals_before | 0.02444 | quarter_finalist | ridge |
| semifinals_before | 0.016463 | quarter_finalist | ridge |
| quarterfinals_before | 0.012308 | quarter_finalist | ridge |
| round16_before | 0.011975 | quarter_finalist | ridge |
| groups_passed_before | 0.009083 | quarter_finalist | ridge |
| losses_last_4y | -0.00673 | quarter_finalist | ridge |
| world_cup_participations_before | 0.006197 | quarter_finalist | ridge |
| squad_avg_age | -0.0061 | quarter_finalist | ridge |
| wins_last_4y | 0.002799 | quarter_finalist | ridge |
| fifa_rank_pre_tournament | -0.00223 | quarter_finalist | ridge |
| goals_received_last_4y | -0.00148 | quarter_finalist | ridge |
| goals_scored_last_4y | 0.000994 | quarter_finalist | ridge |
| draws_last_4y | 0.000814 | quarter_finalist | ridge |
| fifa_points_pre_tournament | 4.68E-05 | quarter_finalist | ridge |
| squad_total_market_value_eur | 1.98E-10 | quarter_finalist | ridge |
| semifinals_before | 0.007354 | semi_finalist | elastic_net |
| finals_before | 0.001564 | semi_finalist | elastic_net |
| fifa_rank_pre_tournament | -0.00056 | semi_finalist | elastic_net |
| squad_total_market_value_eur | 6.44E-10 | semi_finalist | elastic_net |
| continentSouth America | 0 | semi_finalist | elastic_net |
| continentOceania | 0 | semi_finalist | elastic_net |
| continentNorth America | 0 | semi_finalist | elastic_net |
| continentEurope | 0 | semi_finalist | elastic_net |
| continentAsia | 0 | semi_finalist | elastic_net |
| is_host1 | 0 | semi_finalist | elastic_net |
| goals_scored_last_4y | 0 | semi_finalist | elastic_net |
| goals_received_last_4y | 0 | semi_finalist | elastic_net |
| wins_last_4y | 0 | semi_finalist | elastic_net |
| losses_last_4y | 0 | semi_finalist | elastic_net |
| draws_last_4y | 0 | semi_finalist | elastic_net |
| world_cup_titles_before | 0 | semi_finalist | elastic_net |
| fifa_points_pre_tournament | 0 | semi_finalist | elastic_net |
| squad_avg_age | 0 | semi_finalist | elastic_net |
| world_cup_participations_before | 0 | semi_finalist | elastic_net |
| groups_passed_before | 0 | semi_finalist | elastic_net |
| round16_before | 0 | semi_finalist | elastic_net |
| quarterfinals_before | 0 | semi_finalist | elastic_net |
| squad_total_market_value_eur | 8.68E-10 | semi_finalist | lasso |
| continentSouth America | 0 | semi_finalist | lasso |
| continentOceania | 0 | semi_finalist | lasso |
| continentNorth America | 0 | semi_finalist | lasso |
| continentEurope | 0 | semi_finalist | lasso |
| continentAsia | 0 | semi_finalist | lasso |
| is_host1 | 0 | semi_finalist | lasso |
| goals_scored_last_4y | 0 | semi_finalist | lasso |
| goals_received_last_4y | 0 | semi_finalist | lasso |
| wins_last_4y | 0 | semi_finalist | lasso |
| losses_last_4y | 0 | semi_finalist | lasso |
| draws_last_4y | 0 | semi_finalist | lasso |
| world_cup_titles_before | 0 | semi_finalist | lasso |
| fifa_rank_pre_tournament | 0 | semi_finalist | lasso |
| fifa_points_pre_tournament | 0 | semi_finalist | lasso |
| squad_avg_age | 0 | semi_finalist | lasso |
| world_cup_participations_before | 0 | semi_finalist | lasso |
| groups_passed_before | 0 | semi_finalist | lasso |
| round16_before | 0 | semi_finalist | lasso |
| quarterfinals_before | 0 | semi_finalist | lasso |
| semifinals_before | 0 | semi_finalist | lasso |
| finals_before | 0 | semi_finalist | lasso |
| is_host1 | 0.053639 | semi_finalist | ridge |
| continentEurope | 0.022727 | semi_finalist | ridge |
| continentNorth America | -0.02237 | semi_finalist | ridge |
| continentOceania | -0.01981 | semi_finalist | ridge |
| continentAsia | -0.01417 | semi_finalist | ridge |
| world_cup_titles_before | 0.009397 | semi_finalist | ridge |
| continentSouth America | 0.00809 | semi_finalist | ridge |
| finals_before | 0.007569 | semi_finalist | ridge |
| semifinals_before | 0.005152 | semi_finalist | ridge |
| round16_before | 0.003778 | semi_finalist | ridge |
| quarterfinals_before | 0.003591 | semi_finalist | ridge |
| losses_last_4y | -0.00282 | semi_finalist | ridge |
| squad_avg_age | -0.0026 | semi_finalist | ridge |
| groups_passed_before | 0.002385 | semi_finalist | ridge |
| world_cup_participations_before | 0.001875 | semi_finalist | ridge |
| wins_last_4y | 0.001495 | semi_finalist | ridge |
| fifa_rank_pre_tournament | -0.00074 | semi_finalist | ridge |
| goals_scored_last_4y | 0.000495 | semi_finalist | ridge |
| draws_last_4y | -0.00043 | semi_finalist | ridge |
| goals_received_last_4y | -0.00033 | semi_finalist | ridge |
| fifa_points_pre_tournament | 1.97E-05 | semi_finalist | ridge |
| squad_total_market_value_eur | 5.51E-11 | semi_finalist | ridge |
| continentSouth America | 0 | winner | elastic_net |
| continentOceania | 0 | winner | elastic_net |
| continentNorth America | 0 | winner | elastic_net |
| continentEurope | 0 | winner | elastic_net |
| continentAsia | 0 | winner | elastic_net |
| is_host1 | 0 | winner | elastic_net |
| goals_scored_last_4y | 0 | winner | elastic_net |
| goals_received_last_4y | 0 | winner | elastic_net |
| wins_last_4y | 0 | winner | elastic_net |
| losses_last_4y | 0 | winner | elastic_net |
| draws_last_4y | 0 | winner | elastic_net |
| world_cup_titles_before | 0 | winner | elastic_net |
| squad_total_market_value_eur | 0 | winner | elastic_net |
| fifa_rank_pre_tournament | 0 | winner | elastic_net |
| fifa_points_pre_tournament | 0 | winner | elastic_net |
| squad_avg_age | 0 | winner | elastic_net |
| world_cup_participations_before | 0 | winner | elastic_net |
| groups_passed_before | 0 | winner | elastic_net |
| round16_before | 0 | winner | elastic_net |
| quarterfinals_before | 0 | winner | elastic_net |
| semifinals_before | 0 | winner | elastic_net |
| finals_before | 0 | winner | elastic_net |
| continentSouth America | 0 | winner | lasso |
| continentOceania | 0 | winner | lasso |
| continentNorth America | 0 | winner | lasso |
| continentEurope | 0 | winner | lasso |
| continentAsia | 0 | winner | lasso |
| is_host1 | 0 | winner | lasso |
| goals_scored_last_4y | 0 | winner | lasso |
| goals_received_last_4y | 0 | winner | lasso |
| wins_last_4y | 0 | winner | lasso |
| losses_last_4y | 0 | winner | lasso |
| draws_last_4y | 0 | winner | lasso |
| world_cup_titles_before | 0 | winner | lasso |
| squad_total_market_value_eur | 0 | winner | lasso |
| fifa_rank_pre_tournament | 0 | winner | lasso |
| fifa_points_pre_tournament | 0 | winner | lasso |
| squad_avg_age | 0 | winner | lasso |
| world_cup_participations_before | 0 | winner | lasso |
| groups_passed_before | 0 | winner | lasso |
| round16_before | 0 | winner | lasso |
| quarterfinals_before | 0 | winner | lasso |
| semifinals_before | 0 | winner | lasso |
| finals_before | 0 | winner | lasso |
| continentSouth America | 4.49E-38 | winner | ridge |
| continentAsia | -3.59E-38 | winner | ridge |
| continentNorth America | -3.54E-38 | winner | ridge |
| world_cup_titles_before | 3.34E-38 | winner | ridge |
| is_host1 | -3.28E-38 | winner | ridge |
| continentOceania | -3.26E-38 | winner | ridge |
| continentEurope | 3.09E-38 | winner | ridge |
| finals_before | 2.26E-38 | winner | ridge |
| round16_before | 1.49E-38 | winner | ridge |
| squad_avg_age | -1.36E-38 | winner | ridge |
| semifinals_before | 1.30E-38 | winner | ridge |
| quarterfinals_before | 1.05E-38 | winner | ridge |
| groups_passed_before | 8.19E-39 | winner | ridge |
| world_cup_participations_before | 6.91E-39 | winner | ridge |
| losses_last_4y | -6.18E-39 | winner | ridge |
| wins_last_4y | 5.61E-39 | winner | ridge |
| draws_last_4y | -3.38E-39 | winner | ridge |
| fifa_rank_pre_tournament | -1.79E-39 | winner | ridge |
| goals_scored_last_4y | 1.40E-39 | winner | ridge |
| goals_received_last_4y | -5.27E-40 | winner | ridge |
| fifa_points_pre_tournament | 6.36E-41 | winner | ridge |
| squad_total_market_value_eur | 1.26E-46 | winner | ridge |

**Supplementary Table S5**

**Bootstrap Stability Selection Frequencies for All Predictors**

| predictor | selection_frequency | stability_class | outcome | model |
| --- | --- | --- | --- | --- |
| squad_total_market_value_eur | 0.594 | Moderate | finalist | elastic_net |
| losses_last_4y | 0.492 | Weak | finalist | elastic_net |
| wins_last_4y | 0.478 | Weak | finalist | elastic_net |
| fifa_rank_pre_tournament | 0.37 | Weak | finalist | elastic_net |
| semifinals_before | 0.366 | Weak | finalist | elastic_net |
| finals_before | 0.358 | Weak | finalist | elastic_net |
| continentEurope | 0.312 | Weak | finalist | elastic_net |
| goals_scored_last_4y | 0.258 | Weak | finalist | elastic_net |
| round16_before | 0.194 | Weak | finalist | elastic_net |
| fifa_points_pre_tournament | 0.178 | Weak | finalist | elastic_net |
| continentSouth America | 0.172 | Weak | finalist | elastic_net |
| world_cup_titles_before | 0.154 | Weak | finalist | elastic_net |
| quarterfinals_before | 0.138 | Weak | finalist | elastic_net |
| squad_avg_age | 0.128 | Weak | finalist | elastic_net |
| world_cup_participations_before | 0.112 | Weak | finalist | elastic_net |
| draws_last_4y | 0.104 | Weak | finalist | elastic_net |
| groups_passed_before | 0.098 | Weak | finalist | elastic_net |
| goals_received_last_4y | 0.096 | Weak | finalist | elastic_net |
| continentNorth America | 0.094 | Weak | finalist | elastic_net |
| is_host1 | 0.08 | Weak | finalist | elastic_net |
| continentAsia | 0.078 | Weak | finalist | elastic_net |
| continentOceania | 0.002 | Weak | finalist | elastic_net |
| squad_total_market_value_eur | 0.486 | Weak | finalist | lasso |
| wins_last_4y | 0.31 | Weak | finalist | lasso |
| losses_last_4y | 0.288 | Weak | finalist | lasso |
| finals_before | 0.218 | Weak | finalist | lasso |
| continentEurope | 0.216 | Weak | finalist | lasso |
| fifa_rank_pre_tournament | 0.186 | Weak | finalist | lasso |
| semifinals_before | 0.184 | Weak | finalist | lasso |
| goals_scored_last_4y | 0.164 | Weak | finalist | lasso |
| continentSouth America | 0.116 | Weak | finalist | lasso |
| fifa_points_pre_tournament | 0.102 | Weak | finalist | lasso |
| squad_avg_age | 0.102 | Weak | finalist | lasso |
| world_cup_titles_before | 0.076 | Weak | finalist | lasso |
| groups_passed_before | 0.062 | Weak | finalist | lasso |
| round16_before | 0.062 | Weak | finalist | lasso |
| is_host1 | 0.054 | Weak | finalist | lasso |
| draws_last_4y | 0.054 | Weak | finalist | lasso |
| goals_received_last_4y | 0.04 | Weak | finalist | lasso |
| world_cup_participations_before | 0.038 | Weak | finalist | lasso |
| continentAsia | 0.03 | Weak | finalist | lasso |
| continentNorth America | 0.026 | Weak | finalist | lasso |
| quarterfinals_before | 0.022 | Weak | finalist | lasso |
| continentOceania | 0 | Not selected | finalist | lasso |
| squad_total_market_value_eur | 0.98 | Very strong | quarter_finalist | elastic_net |
| continentSouth America | 0.606 | Moderate | quarter_finalist | elastic_net |
| world_cup_titles_before | 0.582 | Moderate | quarter_finalist | elastic_net |
| fifa_rank_pre_tournament | 0.56 | Moderate | quarter_finalist | elastic_net |
| is_host1 | 0.558 | Moderate | quarter_finalist | elastic_net |
| semifinals_before | 0.552 | Moderate | quarter_finalist | elastic_net |
| finals_before | 0.534 | Moderate | quarter_finalist | elastic_net |
| groups_passed_before | 0.378 | Weak | quarter_finalist | elastic_net |
| quarterfinals_before | 0.37 | Weak | quarter_finalist | elastic_net |
| losses_last_4y | 0.312 | Weak | quarter_finalist | elastic_net |
| continentEurope | 0.306 | Weak | quarter_finalist | elastic_net |
| continentAsia | 0.296 | Weak | quarter_finalist | elastic_net |
| goals_scored_last_4y | 0.194 | Weak | quarter_finalist | elastic_net |
| goals_received_last_4y | 0.16 | Weak | quarter_finalist | elastic_net |
| squad_avg_age | 0.136 | Weak | quarter_finalist | elastic_net |
| draws_last_4y | 0.134 | Weak | quarter_finalist | elastic_net |
| world_cup_participations_before | 0.132 | Weak | quarter_finalist | elastic_net |
| fifa_points_pre_tournament | 0.124 | Weak | quarter_finalist | elastic_net |
| continentNorth America | 0.106 | Weak | quarter_finalist | elastic_net |
| wins_last_4y | 0.07 | Weak | quarter_finalist | elastic_net |
| round16_before | 0.068 | Weak | quarter_finalist | elastic_net |
| continentOceania | 0.038 | Weak | quarter_finalist | elastic_net |
| squad_total_market_value_eur | 0.944 | Very strong | quarter_finalist | lasso |
| continentSouth America | 0.516 | Moderate | quarter_finalist | lasso |
| is_host1 | 0.43 | Weak | quarter_finalist | lasso |
| fifa_rank_pre_tournament | 0.31 | Weak | quarter_finalist | lasso |
| world_cup_titles_before | 0.288 | Weak | quarter_finalist | lasso |
| finals_before | 0.262 | Weak | quarter_finalist | lasso |
| semifinals_before | 0.244 | Weak | quarter_finalist | lasso |
| continentEurope | 0.16 | Weak | quarter_finalist | lasso |
| continentAsia | 0.148 | Weak | quarter_finalist | lasso |
| losses_last_4y | 0.138 | Weak | quarter_finalist | lasso |
| groups_passed_before | 0.134 | Weak | quarter_finalist | lasso |
| goals_scored_last_4y | 0.124 | Weak | quarter_finalist | lasso |
| squad_avg_age | 0.088 | Weak | quarter_finalist | lasso |
| goals_received_last_4y | 0.084 | Weak | quarter_finalist | lasso |
| draws_last_4y | 0.078 | Weak | quarter_finalist | lasso |
| quarterfinals_before | 0.07 | Weak | quarter_finalist | lasso |
| fifa_points_pre_tournament | 0.046 | Weak | quarter_finalist | lasso |
| world_cup_participations_before | 0.044 | Weak | quarter_finalist | lasso |
| continentNorth America | 0.038 | Weak | quarter_finalist | lasso |
| wins_last_4y | 0.038 | Weak | quarter_finalist | lasso |
| round16_before | 0.016 | Weak | quarter_finalist | lasso |
| continentOceania | 0.012 | Weak | quarter_finalist | lasso |
| squad_total_market_value_eur | 0.838 | Strong | semi_finalist | elastic_net |
| losses_last_4y | 0.696 | Moderate | semi_finalist | elastic_net |
| fifa_rank_pre_tournament | 0.638 | Moderate | semi_finalist | elastic_net |
| is_host1 | 0.584 | Moderate | semi_finalist | elastic_net |
| continentEurope | 0.538 | Moderate | semi_finalist | elastic_net |
| goals_scored_last_4y | 0.504 | Moderate | semi_finalist | elastic_net |
| semifinals_before | 0.45 | Weak | semi_finalist | elastic_net |
| finals_before | 0.418 | Weak | semi_finalist | elastic_net |
| wins_last_4y | 0.308 | Weak | semi_finalist | elastic_net |
| fifa_points_pre_tournament | 0.208 | Weak | semi_finalist | elastic_net |
| squad_avg_age | 0.19 | Weak | semi_finalist | elastic_net |
| continentSouth America | 0.158 | Weak | semi_finalist | elastic_net |
| quarterfinals_before | 0.156 | Weak | semi_finalist | elastic_net |
| continentNorth America | 0.138 | Weak | semi_finalist | elastic_net |
| world_cup_titles_before | 0.118 | Weak | semi_finalist | elastic_net |
| round16_before | 0.104 | Weak | semi_finalist | elastic_net |
| continentAsia | 0.102 | Weak | semi_finalist | elastic_net |
| draws_last_4y | 0.1 | Weak | semi_finalist | elastic_net |
| world_cup_participations_before | 0.096 | Weak | semi_finalist | elastic_net |
| groups_passed_before | 0.078 | Weak | semi_finalist | elastic_net |
| goals_received_last_4y | 0.058 | Weak | semi_finalist | elastic_net |
| continentOceania | 0.004 | Weak | semi_finalist | elastic_net |
| squad_total_market_value_eur | 0.694 | Moderate | semi_finalist | lasso |
| is_host1 | 0.546 | Moderate | semi_finalist | lasso |
| losses_last_4y | 0.524 | Moderate | semi_finalist | lasso |
| goals_scored_last_4y | 0.42 | Weak | semi_finalist | lasso |
| fifa_rank_pre_tournament | 0.414 | Weak | semi_finalist | lasso |
| continentEurope | 0.382 | Weak | semi_finalist | lasso |
| finals_before | 0.284 | Weak | semi_finalist | lasso |
| semifinals_before | 0.226 | Weak | semi_finalist | lasso |
| wins_last_4y | 0.176 | Weak | semi_finalist | lasso |
| squad_avg_age | 0.14 | Weak | semi_finalist | lasso |
| fifa_points_pre_tournament | 0.136 | Weak | semi_finalist | lasso |
| continentSouth America | 0.11 | Weak | semi_finalist | lasso |
| continentNorth America | 0.068 | Weak | semi_finalist | lasso |
| draws_last_4y | 0.066 | Weak | semi_finalist | lasso |
| round16_before | 0.054 | Weak | semi_finalist | lasso |
| world_cup_titles_before | 0.044 | Weak | semi_finalist | lasso |
| quarterfinals_before | 0.042 | Weak | semi_finalist | lasso |
| continentAsia | 0.038 | Weak | semi_finalist | lasso |
| goals_received_last_4y | 0.034 | Weak | semi_finalist | lasso |
| groups_passed_before | 0.034 | Weak | semi_finalist | lasso |
| world_cup_participations_before | 0.032 | Weak | semi_finalist | lasso |
| continentOceania | 0.004 | Weak | semi_finalist | lasso |
| wins_last_4y | 0.432 | Weak | winner | elastic_net |
| squad_total_market_value_eur | 0.36 | Weak | winner | elastic_net |
| losses_last_4y | 0.306 | Weak | winner | elastic_net |
| finals_before | 0.292 | Weak | winner | elastic_net |
| goals_scored_last_4y | 0.284 | Weak | winner | elastic_net |
| squad_avg_age | 0.27 | Weak | winner | elastic_net |
| world_cup_participations_before | 0.262 | Weak | winner | elastic_net |
| round16_before | 0.254 | Weak | winner | elastic_net |
| world_cup_titles_before | 0.232 | Weak | winner | elastic_net |
| fifa_rank_pre_tournament | 0.222 | Weak | winner | elastic_net |
| fifa_points_pre_tournament | 0.216 | Weak | winner | elastic_net |
| continentEurope | 0.198 | Weak | winner | elastic_net |
| continentSouth America | 0.182 | Weak | winner | elastic_net |
| draws_last_4y | 0.182 | Weak | winner | elastic_net |
| groups_passed_before | 0.148 | Weak | winner | elastic_net |
| semifinals_before | 0.14 | Weak | winner | elastic_net |
| goals_received_last_4y | 0.132 | Weak | winner | elastic_net |
| continentNorth America | 0.116 | Weak | winner | elastic_net |
| quarterfinals_before | 0.108 | Weak | winner | elastic_net |
| continentAsia | 0.05 | Weak | winner | elastic_net |
| is_host1 | 0.05 | Weak | winner | elastic_net |
| continentOceania | 0 | Not selected | winner | elastic_net |
| wins_last_4y | 0.324 | Weak | winner | lasso |
| squad_total_market_value_eur | 0.224 | Weak | winner | lasso |
| squad_avg_age | 0.194 | Weak | winner | lasso |
| losses_last_4y | 0.192 | Weak | winner | lasso |
| goals_scored_last_4y | 0.164 | Weak | winner | lasso |
| finals_before | 0.146 | Weak | winner | lasso |
| world_cup_titles_before | 0.122 | Weak | winner | lasso |
| continentEurope | 0.106 | Weak | winner | lasso |
| fifa_points_pre_tournament | 0.102 | Weak | winner | lasso |
| world_cup_participations_before | 0.1 | Weak | winner | lasso |
| continentSouth America | 0.094 | Weak | winner | lasso |
| fifa_rank_pre_tournament | 0.094 | Weak | winner | lasso |
| round16_before | 0.088 | Weak | winner | lasso |
| draws_last_4y | 0.076 | Weak | winner | lasso |
| goals_received_last_4y | 0.07 | Weak | winner | lasso |
| continentNorth America | 0.064 | Weak | winner | lasso |
| semifinals_before | 0.05 | Weak | winner | lasso |
| groups_passed_before | 0.038 | Weak | winner | lasso |
| quarterfinals_before | 0.018 | Weak | winner | lasso |
| is_host1 | 0.016 | Weak | winner | lasso |
| continentAsia | 0.012 | Weak | winner | lasso |
| continentOceania | 0 | Not selected | winner | lasso |

**Supplementary Table S6**

**Predictors with Stability Selection Frequency ≥ 0.50**

| predictor | selection_frequency | stability_class | outcome | model |
| --- | --- | --- | --- | --- |
| squad_total_market_value_eur | 0.594 | Moderate | finalist | elastic_net |
| squad_total_market_value_eur | 0.98 | Very strong | quarter_finalist | elastic_net |
| continentSouth America | 0.606 | Moderate | quarter_finalist | elastic_net |
| world_cup_titles_before | 0.582 | Moderate | quarter_finalist | elastic_net |
| fifa_rank_pre_tournament | 0.56 | Moderate | quarter_finalist | elastic_net |
| is_host1 | 0.558 | Moderate | quarter_finalist | elastic_net |
| semifinals_before | 0.552 | Moderate | quarter_finalist | elastic_net |
| finals_before | 0.534 | Moderate | quarter_finalist | elastic_net |
| squad_total_market_value_eur | 0.944 | Very strong | quarter_finalist | lasso |
| continentSouth America | 0.516 | Moderate | quarter_finalist | lasso |
| squad_total_market_value_eur | 0.838 | Strong | semi_finalist | elastic_net |
| losses_last_4y | 0.696 | Moderate | semi_finalist | elastic_net |
| fifa_rank_pre_tournament | 0.638 | Moderate | semi_finalist | elastic_net |
| is_host1 | 0.584 | Moderate | semi_finalist | elastic_net |
| continentEurope | 0.538 | Moderate | semi_finalist | elastic_net |
| goals_scored_last_4y | 0.504 | Moderate | semi_finalist | elastic_net |
| squad_total_market_value_eur | 0.694 | Moderate | semi_finalist | lasso |
| is_host1 | 0.546 | Moderate | semi_finalist | lasso |
| losses_last_4y | 0.524 | Moderate | semi_finalist | lasso |

**Supplementary Table S7**

**Predictors with Stability Selection Frequency ≥ 0.75**

| predictor | selection_frequency | stability_class | outcome | model |
| --- | --- | --- | --- | --- |
| squad_total_market_value_eur | 0.98 | Very strong | quarter_finalist | elastic_net |
| squad_total_market_value_eur | 0.944 | Very strong | quarter_finalist | lasso |
| squad_total_market_value_eur | 0.838 | Strong | semi_finalist | elastic_net |

**Supplementary Table S8**

**Predicted Probabilities of FIFA World Cup 2026 Tournament Progression for All Teams Using Baseline Logistic Regression**

| version | team | continent | outcome | model | Predicted probability |
| --- | --- | --- | --- | --- | --- |
| 2026 | Brazil | South America | quarter_finalist | baseline_logistic | 0.839348251 |
| 2026 | France | Europe | quarter_finalist | baseline_logistic | 0.828452749 |
| 2026 | England | Europe | quarter_finalist | baseline_logistic | 0.763672826 |
| 2026 | Germany | Europe | quarter_finalist | baseline_logistic | 0.753724738 |
| 2026 | Spain | Europe | quarter_finalist | baseline_logistic | 0.723758096 |
| 2026 | Argentina | South America | quarter_finalist | baseline_logistic | 0.65316684 |
| 2026 | Portugal | Europe | quarter_finalist | baseline_logistic | 0.469387765 |
| 2026 | Netherlands | Europe | quarter_finalist | baseline_logistic | 0.468446948 |
| 2026 | Uruguay | South America | quarter_finalist | baseline_logistic | 0.340819374 |
| 2026 | Morocco | Africa | quarter_finalist | baseline_logistic | 0.279289415 |
| 2026 | Belgium | Europe | quarter_finalist | baseline_logistic | 0.267336321 |
| 2026 | Senegal | Africa | quarter_finalist | baseline_logistic | 0.254786313 |
| 2026 | Turkey | Europe | quarter_finalist | baseline_logistic | 0.253689338 |
| 2026 | Norway | Europe | quarter_finalist | baseline_logistic | 0.228885389 |
| 2026 | Colombia | South America | quarter_finalist | baseline_logistic | 0.214570372 |
| 2026 | Ecuador | South America | quarter_finalist | baseline_logistic | 0.203307384 |
| 2026 | Croatia | Europe | quarter_finalist | baseline_logistic | 0.200204079 |
| 2026 | Switzerland | Europe | quarter_finalist | baseline_logistic | 0.18457879 |
| 2026 | Sweden | Europe | quarter_finalist | baseline_logistic | 0.183218147 |
| 2026 | Japan | Asia | quarter_finalist | baseline_logistic | 0.179259957 |
| 2026 | Ivory Coast | Africa | quarter_finalist | baseline_logistic | 0.176359844 |
| 2026 | Mexico | North America | quarter_finalist | baseline_logistic | 0.164328407 |
| 2026 | United States | North America | quarter_finalist | baseline_logistic | 0.161893226 |
| 2026 | Algeria | Africa | quarter_finalist | baseline_logistic | 0.153351581 |
| 2026 | Austria | Europe | quarter_finalist | baseline_logistic | 0.150452492 |
| 2026 | Egypt | Africa | quarter_finalist | baseline_logistic | 0.128285877 |
| 2026 | South Korea | Asia | quarter_finalist | baseline_logistic | 0.127221068 |
| 2026 | Iran | Asia | quarter_finalist | baseline_logistic | 0.123089849 |
| 2026 | Scotland | Europe | quarter_finalist | baseline_logistic | 0.114864571 |
| 2026 | Australia | Oceania | quarter_finalist | baseline_logistic | 0.110521813 |
| 2026 | Czech Republic | Europe | quarter_finalist | baseline_logistic | 0.106498296 |
| 2026 | Paraguay | South America | quarter_finalist | baseline_logistic | 0.103463749 |
| 2026 | Canada | North America | quarter_finalist | baseline_logistic | 0.102739555 |
| 2026 | DR Congo | Africa | quarter_finalist | baseline_logistic | 0.094661439 |
| 2026 | Panama | North America | quarter_finalist | baseline_logistic | 0.094471846 |
| 2026 | Tunisia | Africa | quarter_finalist | baseline_logistic | 0.086993292 |
| 2026 | Uzbekistan | Asia | quarter_finalist | baseline_logistic | 0.070543739 |
| 2026 | Bosnia and Herzegovina | Europe | quarter_finalist | baseline_logistic | 0.064887731 |
| 2026 | Qatar | Asia | quarter_finalist | baseline_logistic | 0.064691249 |
| 2026 | South Africa | Africa | quarter_finalist | baseline_logistic | 0.06197569 |
| 2026 | Iraq | Asia | quarter_finalist | baseline_logistic | 0.061473298 |
| 2026 | Ghana | Africa | quarter_finalist | baseline_logistic | 0.060004913 |
| 2026 | Saudi Arabia | Asia | quarter_finalist | baseline_logistic | 0.058267815 |
| 2026 | Jordan | Asia | quarter_finalist | baseline_logistic | 0.054803411 |
| 2026 | Cape Verde | Africa | quarter_finalist | baseline_logistic | 0.051115562 |
| 2026 | Haiti | North America | quarter_finalist | baseline_logistic | 0.039729772 |
| 2026 | Cura?o | North America | quarter_finalist | baseline_logistic | 0.039456856 |
| 2026 | New Zealand | Oceania | quarter_finalist | baseline_logistic | 0.036617138 |
| 2026 | France | Europe | semi_finalist | baseline_logistic | 0.628169555 |
| 2026 | Netherlands | Europe | semi_finalist | baseline_logistic | 0.573424923 |
| 2026 | Germany | Europe | semi_finalist | baseline_logistic | 0.487115944 |
| 2026 | England | Europe | semi_finalist | baseline_logistic | 0.429604066 |
| 2026 | Spain | Europe | semi_finalist | baseline_logistic | 0.388979767 |
| 2026 | Argentina | South America | semi_finalist | baseline_logistic | 0.36374644 |
| 2026 | Portugal | Europe | semi_finalist | baseline_logistic | 0.31731939 |
| 2026 | Brazil | South America | semi_finalist | baseline_logistic | 0.246751906 |
| 2026 | Croatia | Europe | semi_finalist | baseline_logistic | 0.185800965 |
| 2026 | Belgium | Europe | semi_finalist | baseline_logistic | 0.178886429 |
| 2026 | Morocco | Africa | semi_finalist | baseline_logistic | 0.175766453 |
| 2026 | Senegal | Africa | semi_finalist | baseline_logistic | 0.123545808 |
| 2026 | Colombia | South America | semi_finalist | baseline_logistic | 0.111567499 |
| 2026 | Turkey | Europe | semi_finalist | baseline_logistic | 0.102813168 |
| 2026 | United States | North America | semi_finalist | baseline_logistic | 0.089045637 |
| 2026 | Mexico | North America | semi_finalist | baseline_logistic | 0.085043771 |
| 2026 | Japan | Asia | semi_finalist | baseline_logistic | 0.081830555 |
| 2026 | Switzerland | Europe | semi_finalist | baseline_logistic | 0.080821962 |
| 2026 | Sweden | Europe | semi_finalist | baseline_logistic | 0.077496333 |
| 2026 | Ecuador | South America | semi_finalist | baseline_logistic | 0.07578621 |
| 2026 | Austria | Europe | semi_finalist | baseline_logistic | 0.06992188 |
| 2026 | Uruguay | South America | semi_finalist | baseline_logistic | 0.065882432 |
| 2026 | Norway | Europe | semi_finalist | baseline_logistic | 0.06289903 |
| 2026 | Iran | Asia | semi_finalist | baseline_logistic | 0.055507673 |
| 2026 | South Korea | Asia | semi_finalist | baseline_logistic | 0.054187132 |
| 2026 | Algeria | Africa | semi_finalist | baseline_logistic | 0.050913366 |
| 2026 | Czech Republic | Europe | semi_finalist | baseline_logistic | 0.049980833 |
| 2026 | Ivory Coast | Africa | semi_finalist | baseline_logistic | 0.045712065 |
| 2026 | Egypt | Africa | semi_finalist | baseline_logistic | 0.042884379 |
| 2026 | Australia | Oceania | semi_finalist | baseline_logistic | 0.041277008 |
| 2026 | Canada | North America | semi_finalist | baseline_logistic | 0.035057209 |
| 2026 | Panama | North America | semi_finalist | baseline_logistic | 0.029522415 |
| 2026 | Paraguay | South America | semi_finalist | baseline_logistic | 0.024380484 |
| 2026 | Scotland | Europe | semi_finalist | baseline_logistic | 0.023594299 |
| 2026 | Tunisia | Africa | semi_finalist | baseline_logistic | 0.018483591 |
| 2026 | DR Congo | Africa | semi_finalist | baseline_logistic | 0.018261093 |
| 2026 | Uzbekistan | Asia | semi_finalist | baseline_logistic | 0.01267221 |
| 2026 | Qatar | Asia | semi_finalist | baseline_logistic | 0.009864218 |
| 2026 | Iraq | Asia | semi_finalist | baseline_logistic | 0.008817994 |
| 2026 | South Africa | Africa | semi_finalist | baseline_logistic | 0.007922957 |
| 2026 | Saudi Arabia | Asia | semi_finalist | baseline_logistic | 0.007297453 |
| 2026 | Bosnia and Herzegovina | Europe | semi_finalist | baseline_logistic | 0.006784747 |
| 2026 | Jordan | Asia | semi_finalist | baseline_logistic | 0.006475235 |
| 2026 | Cape Verde | Africa | semi_finalist | baseline_logistic | 0.004911055 |
| 2026 | Ghana | Africa | semi_finalist | baseline_logistic | 0.00456405 |
| 2026 | Cura?o | North America | semi_finalist | baseline_logistic | 0.002496735 |
| 2026 | Haiti | North America | semi_finalist | baseline_logistic | 0.002415774 |
| 2026 | New Zealand | Oceania | semi_finalist | baseline_logistic | 0.002113554 |
| 2026 | France | Europe | finalist | baseline_logistic | 0.521672363 |
| 2026 | Netherlands | Europe | finalist | baseline_logistic | 0.360614834 |
| 2026 | England | Europe | finalist | baseline_logistic | 0.289707779 |
| 2026 | Spain | Europe | finalist | baseline_logistic | 0.288858261 |
| 2026 | Argentina | South America | finalist | baseline_logistic | 0.265387953 |
| 2026 | Germany | Europe | finalist | baseline_logistic | 0.256722608 |
| 2026 | Portugal | Europe | finalist | baseline_logistic | 0.193975183 |
| 2026 | Brazil | South America | finalist | baseline_logistic | 0.146955903 |
| 2026 | Morocco | Africa | finalist | baseline_logistic | 0.086863889 |
| 2026 | Belgium | Europe | finalist | baseline_logistic | 0.082417062 |
| 2026 | Croatia | Europe | finalist | baseline_logistic | 0.075511273 |
| 2026 | Senegal | Africa | finalist | baseline_logistic | 0.040511555 |
| 2026 | Colombia | South America | finalist | baseline_logistic | 0.039249228 |
| 2026 | Mexico | North America | finalist | baseline_logistic | 0.02610668 |
| 2026 | United States | North America | finalist | baseline_logistic | 0.025333297 |
| 2026 | Japan | Asia | finalist | baseline_logistic | 0.020308227 |
| 2026 | Turkey | Europe | finalist | baseline_logistic | 0.019047724 |
| 2026 | Switzerland | Europe | finalist | baseline_logistic | 0.018679951 |
| 2026 | Uruguay | South America | finalist | baseline_logistic | 0.017685755 |
| 2026 | Ecuador | South America | finalist | baseline_logistic | 0.013166053 |
| 2026 | Iran | Asia | finalist | baseline_logistic | 0.011248453 |
| 2026 | Austria | Europe | finalist | baseline_logistic | 0.011233657 |
| 2026 | South Korea | Asia | finalist | baseline_logistic | 0.008201881 |
| 2026 | Algeria | Africa | finalist | baseline_logistic | 0.006243902 |
| 2026 | Norway | Europe | finalist | baseline_logistic | 0.006161666 |
| 2026 | Australia | Oceania | finalist | baseline_logistic | 0.005494774 |
| 2026 | Egypt | Africa | finalist | baseline_logistic | 0.004929074 |
| 2026 | Sweden | Europe | finalist | baseline_logistic | 0.004532593 |
| 2026 | Canada | North America | finalist | baseline_logistic | 0.003786282 |
| 2026 | Ivory Coast | Africa | finalist | baseline_logistic | 0.003644729 |
| 2026 | Panama | North America | finalist | baseline_logistic | 0.002589199 |
| 2026 | Czech Republic | Europe | finalist | baseline_logistic | 0.002427318 |
| 2026 | Paraguay | South America | finalist | baseline_logistic | 0.001300079 |
| 2026 | Scotland | Europe | finalist | baseline_logistic | 0.001013428 |
| 2026 | Tunisia | Africa | finalist | baseline_logistic | 0.000750026 |
| 2026 | DR Congo | Africa | finalist | baseline_logistic | 0.000641093 |
| 2026 | Uzbekistan | Asia | finalist | baseline_logistic | 0.00034109 |
| 2026 | Qatar | Asia | finalist | baseline_logistic | 0.000187899 |
| 2026 | Iraq | Asia | finalist | baseline_logistic | 0.00014643 |
| 2026 | South Africa | Africa | finalist | baseline_logistic | 0.000106603 |
| 2026 | Saudi Arabia | Asia | finalist | baseline_logistic | 9.19E-05 |
| 2026 | Jordan | Asia | finalist | baseline_logistic | 7.11E-05 |
| 2026 | Bosnia and Herzegovina | Europe | finalist | baseline_logistic | 6.42E-05 |
| 2026 | Cape Verde | Africa | finalist | baseline_logistic | 3.56E-05 |
| 2026 | Ghana | Africa | finalist | baseline_logistic | 2.31E-05 |
| 2026 | Cura?o | North America | finalist | baseline_logistic | 7.41E-06 |
| 2026 | Haiti | North America | finalist | baseline_logistic | 6.69E-06 |
| 2026 | New Zealand | Oceania | finalist | baseline_logistic | 5.11E-06 |
| 2026 | Argentina | South America | winner | baseline_logistic | 0.379709703 |
| 2026 | France | Europe | winner | baseline_logistic | 0.289003004 |
| 2026 | Spain | Europe | winner | baseline_logistic | 0.211267507 |
| 2026 | England | Europe | winner | baseline_logistic | 0.127605733 |
| 2026 | Netherlands | Europe | winner | baseline_logistic | 0.089534818 |
| 2026 | Portugal | Europe | winner | baseline_logistic | 0.052107029 |
| 2026 | Brazil | South America | winner | baseline_logistic | 0.048162769 |
| 2026 | Germany | Europe | winner | baseline_logistic | 0.044548653 |
| 2026 | Morocco | Africa | winner | baseline_logistic | 0.02619978 |
| 2026 | Belgium | Europe | winner | baseline_logistic | 0.014585924 |
| 2026 | Colombia | South America | winner | baseline_logistic | 0.012289216 |
| 2026 | Senegal | Africa | winner | baseline_logistic | 0.011845929 |
| 2026 | Croatia | Europe | winner | baseline_logistic | 0.010890237 |
| 2026 | Mexico | North America | winner | baseline_logistic | 0.006906852 |
| 2026 | Japan | Asia | winner | baseline_logistic | 0.004275813 |
| 2026 | United States | North America | winner | baseline_logistic | 0.003918078 |
| 2026 | Switzerland | Europe | winner | baseline_logistic | 0.003645022 |
| 2026 | Ecuador | South America | winner | baseline_logistic | 0.001894728 |
| 2026 | Turkey | Europe | winner | baseline_logistic | 0.001887035 |
| 2026 | Iran | Asia | winner | baseline_logistic | 0.001851961 |
| 2026 | Uruguay | South America | winner | baseline_logistic | 0.001330312 |
| 2026 | South Korea | Asia | winner | baseline_logistic | 0.000626955 |
| 2026 | Algeria | Africa | winner | baseline_logistic | 0.00060585 |
| 2026 | Austria | Europe | winner | baseline_logistic | 0.000588042 |
| 2026 | Australia | Oceania | winner | baseline_logistic | 0.000569262 |
| 2026 | Norway | Europe | winner | baseline_logistic | 0.00048219 |
| 2026 | Egypt | Africa | winner | baseline_logistic | 0.00044043 |
| 2026 | Canada | North America | winner | baseline_logistic | 0.000311245 |
| 2026 | Ivory Coast | Africa | winner | baseline_logistic | 0.00022471 |
| 2026 | Panama | North America | winner | baseline_logistic | 0.0001689 |
| 2026 | Czech Republic | Europe | winner | baseline_logistic | 8.00E-05 |
| 2026 | Paraguay | South America | winner | baseline_logistic | 4.99E-05 |
| 2026 | Sweden | Europe | winner | baseline_logistic | 4.96E-05 |
| 2026 | Scotland | Europe | winner | baseline_logistic | 3.11E-05 |
| 2026 | Tunisia | Africa | winner | baseline_logistic | 2.11E-05 |
| 2026 | DR Congo | Africa | winner | baseline_logistic | 1.56E-05 |
| 2026 | Uzbekistan | Asia | winner | baseline_logistic | 6.06E-06 |
| 2026 | Qatar | Asia | winner | baseline_logistic | 2.28E-06 |
| 2026 | Iraq | Asia | winner | baseline_logistic | 1.52E-06 |
| 2026 | South Africa | Africa | winner | baseline_logistic | 8.83E-07 |
| 2026 | Saudi Arabia | Asia | winner | baseline_logistic | 7.04E-07 |
| 2026 | Jordan | Asia | winner | baseline_logistic | 4.67E-07 |
| 2026 | Bosnia and Herzegovina | Europe | winner | baseline_logistic | 3.64E-07 |
| 2026 | Cape Verde | Africa | winner | baseline_logistic | 1.48E-07 |
| 2026 | Ghana | Africa | winner | baseline_logistic | 6.61E-08 |
| 2026 | Cura?o | North America | winner | baseline_logistic | 1.14E-08 |
| 2026 | Haiti | North America | winner | baseline_logistic | 9.54E-09 |
| 2026 | New Zealand | Oceania | winner | baseline_logistic | 6.25E-09 |

**Supplementary Table S9**

**Predicted Probabilities of FIFA World Cup 2026 Tournament Progression for All Teams Using Elastic Net Regression**

| version | team | continent | outcome | model | predicted_probability |
| --- | --- | --- | --- | --- | --- |
| 2026 | England | Europe | finalist | elastic_net | 0.094524812 |
| 2026 | France | Europe | finalist | elastic_net | 0.094421537 |
| 2026 | Spain | Europe | finalist | elastic_net | 0.088612543 |
| 2026 | Brazil | South America | finalist | elastic_net | 0.081290402 |
| 2026 | Germany | Europe | finalist | elastic_net | 0.07785197 |
| 2026 | Portugal | Europe | finalist | elastic_net | 0.077603299 |
| 2026 | Netherlands | Europe | finalist | elastic_net | 0.076688867 |
| 2026 | Argentina | South America | finalist | elastic_net | 0.069368575 |
| 2026 | Turkey | Europe | finalist | elastic_net | 0.067104143 |
| 2026 | Sweden | Europe | finalist | elastic_net | 0.066909385 |
| 2026 | Norway | Europe | finalist | elastic_net | 0.066894728 |
| 2026 | Belgium | Europe | finalist | elastic_net | 0.065248377 |
| 2026 | Morocco | Africa | finalist | elastic_net | 0.065005923 |
| 2026 | Uruguay | South America | finalist | elastic_net | 0.064752309 |
| 2026 | Senegal | Africa | finalist | elastic_net | 0.064115117 |
| 2026 | Ivory Coast | Africa | finalist | elastic_net | 0.063136072 |
| 2026 | Ecuador | South America | finalist | elastic_net | 0.062550962 |
| 2026 | Colombia | South America | finalist | elastic_net | 0.060803939 |
| 2026 | Croatia | Europe | finalist | elastic_net | 0.060243986 |
| 2026 | Switzerland | Europe | finalist | elastic_net | 0.05989858 |
| 2026 | Austria | Europe | finalist | elastic_net | 0.05949414 |
| 2026 | Algeria | Africa | finalist | elastic_net | 0.059323804 |
| 2026 | Japan | Asia | finalist | elastic_net | 0.059177661 |
| 2026 | Scotland | Europe | finalist | elastic_net | 0.058864336 |
| 2026 | United States | North America | finalist | elastic_net | 0.057838059 |
| 2026 | Ghana | Africa | finalist | elastic_net | 0.057668494 |
| 2026 | Mexico | North America | finalist | elastic_net | 0.05709113 |
| 2026 | Egypt | Africa | finalist | elastic_net | 0.056942612 |
| 2026 | DR Congo | Africa | finalist | elastic_net | 0.056888581 |
| 2026 | Paraguay | South America | finalist | elastic_net | 0.056635405 |
| 2026 | South Korea | Asia | finalist | elastic_net | 0.056553048 |
| 2026 | Czech Republic | Europe | finalist | elastic_net | 0.056526959 |
| 2026 | Bosnia and Herzegovina | Europe | finalist | elastic_net | 0.056481763 |
| 2026 | Tunisia | Africa | finalist | elastic_net | 0.055262995 |
| 2026 | South Africa | Africa | finalist | elastic_net | 0.054679268 |
| 2026 | Haiti | North America | finalist | elastic_net | 0.054541489 |
| 2026 | Iran | Asia | finalist | elastic_net | 0.054432948 |
| 2026 | Australia | Oceania | finalist | elastic_net | 0.054399221 |
| 2026 | Cape Verde | Africa | finalist | elastic_net | 0.054374661 |
| 2026 | Cura?o | North America | finalist | elastic_net | 0.054219596 |
| 2026 | Canada | North America | finalist | elastic_net | 0.054135627 |
| 2026 | Saudi Arabia | Asia | finalist | elastic_net | 0.054133709 |
| 2026 | Qatar | Asia | finalist | elastic_net | 0.054042684 |
| 2026 | New Zealand | Oceania | finalist | elastic_net | 0.054005119 |
| 2026 | Uzbekistan | Asia | finalist | elastic_net | 0.053967339 |
| 2026 | Iraq | Asia | finalist | elastic_net | 0.053868226 |
| 2026 | Jordan | Asia | finalist | elastic_net | 0.053834829 |
| 2026 | Panama | North America | finalist | elastic_net | 0.053739516 |
| 2026 | France | Europe | finalist | lasso | 0.162777845 |
| 2026 | England | Europe | finalist | lasso | 0.160854423 |
| 2026 | Spain | Europe | finalist | lasso | 0.138896585 |
| 2026 | Brazil | South America | finalist | lasso | 0.115830839 |
| 2026 | Germany | Europe | finalist | lasso | 0.105735408 |
| 2026 | Portugal | Europe | finalist | lasso | 0.100778473 |
| 2026 | Netherlands | Europe | finalist | lasso | 0.099670712 |
| 2026 | Argentina | South America | finalist | lasso | 0.079929394 |
| 2026 | Turkey | Europe | finalist | lasso | 0.070992168 |
| 2026 | Sweden | Europe | finalist | lasso | 0.070630384 |
| 2026 | Norway | Europe | finalist | lasso | 0.070591006 |
| 2026 | Belgium | Europe | finalist | lasso | 0.066143768 |
| 2026 | Morocco | Africa | finalist | lasso | 0.065672683 |
| 2026 | Uruguay | South America | finalist | lasso | 0.065046491 |
| 2026 | Senegal | Africa | finalist | lasso | 0.063610013 |
| 2026 | Ivory Coast | Africa | finalist | lasso | 0.061246303 |
| 2026 | Ecuador | South America | finalist | lasso | 0.059857379 |
| 2026 | Colombia | South America | finalist | lasso | 0.055815917 |
| 2026 | Croatia | Europe | finalist | lasso | 0.05466544 |
| 2026 | Switzerland | Europe | finalist | lasso | 0.053783742 |
| 2026 | Austria | Europe | finalist | lasso | 0.052676175 |
| 2026 | Algeria | Africa | finalist | lasso | 0.052515631 |
| 2026 | Japan | Asia | finalist | lasso | 0.052195927 |
| 2026 | Scotland | Europe | finalist | lasso | 0.05151422 |
| 2026 | United States | North America | finalist | lasso | 0.049216877 |
| 2026 | Ghana | Africa | finalist | lasso | 0.048959063 |
| 2026 | Mexico | North America | finalist | lasso | 0.047751849 |
| 2026 | Egypt | Africa | finalist | lasso | 0.047444091 |
| 2026 | DR Congo | Africa | finalist | lasso | 0.047332411 |
| 2026 | Czech Republic | Europe | finalist | lasso | 0.047163185 |
| 2026 | Paraguay | South America | finalist | lasso | 0.04681111 |
| 2026 | South Korea | Asia | finalist | lasso | 0.046547404 |
| 2026 | Bosnia and Herzegovina | Europe | finalist | lasso | 0.046496363 |
| 2026 | Tunisia | Africa | finalist | lasso | 0.044042654 |
| 2026 | South Africa | Africa | finalist | lasso | 0.042894468 |
| 2026 | Haiti | North America | finalist | lasso | 0.042626005 |
| 2026 | Iran | Asia | finalist | lasso | 0.042415195 |
| 2026 | Australia | Oceania | finalist | lasso | 0.042349813 |
| 2026 | Cape Verde | Africa | finalist | lasso | 0.042302238 |
| 2026 | Cura?o | North America | finalist | lasso | 0.042002579 |
| 2026 | Canada | North America | finalist | lasso | 0.041840824 |
| 2026 | Saudi Arabia | Asia | finalist | lasso | 0.041837133 |
| 2026 | Qatar | Asia | finalist | lasso | 0.041662203 |
| 2026 | New Zealand | Oceania | finalist | lasso | 0.041590133 |
| 2026 | Uzbekistan | Asia | finalist | lasso | 0.041517725 |
| 2026 | Iraq | Asia | finalist | lasso | 0.041328113 |
| 2026 | Jordan | Asia | finalist | lasso | 0.041264335 |
| 2026 | Panama | North America | finalist | lasso | 0.041082629 |
| 2026 | France | Europe | finalist | ridge | 0.0625 |
| 2026 | Spain | Europe | finalist | ridge | 0.0625 |
| 2026 | Argentina | South America | finalist | ridge | 0.0625 |
| 2026 | England | Europe | finalist | ridge | 0.0625 |
| 2026 | Portugal | Europe | finalist | ridge | 0.0625 |
| 2026 | Brazil | South America | finalist | ridge | 0.0625 |
| 2026 | Netherlands | Europe | finalist | ridge | 0.0625 |
| 2026 | Morocco | Africa | finalist | ridge | 0.0625 |
| 2026 | Belgium | Europe | finalist | ridge | 0.0625 |
| 2026 | Germany | Europe | finalist | ridge | 0.0625 |
| 2026 | Croatia | Europe | finalist | ridge | 0.0625 |
| 2026 | Colombia | South America | finalist | ridge | 0.0625 |
| 2026 | Senegal | Africa | finalist | ridge | 0.0625 |
| 2026 | Mexico | North America | finalist | ridge | 0.0625 |
| 2026 | United States | North America | finalist | ridge | 0.0625 |
| 2026 | Uruguay | South America | finalist | ridge | 0.0625 |
| 2026 | Japan | Asia | finalist | ridge | 0.0625 |
| 2026 | Switzerland | Europe | finalist | ridge | 0.0625 |
| 2026 | Iran | Asia | finalist | ridge | 0.0625 |
| 2026 | Turkey | Europe | finalist | ridge | 0.0625 |
| 2026 | Ecuador | South America | finalist | ridge | 0.0625 |
| 2026 | Austria | Europe | finalist | ridge | 0.0625 |
| 2026 | South Korea | Asia | finalist | ridge | 0.0625 |
| 2026 | Australia | Oceania | finalist | ridge | 0.0625 |
| 2026 | Algeria | Africa | finalist | ridge | 0.0625 |
| 2026 | Egypt | Africa | finalist | ridge | 0.0625 |
| 2026 | Canada | North America | finalist | ridge | 0.0625 |
| 2026 | Norway | Europe | finalist | ridge | 0.0625 |
| 2026 | Panama | North America | finalist | ridge | 0.0625 |
| 2026 | Ivory Coast | Africa | finalist | ridge | 0.0625 |
| 2026 | Sweden | Europe | finalist | ridge | 0.0625 |
| 2026 | Paraguay | South America | finalist | ridge | 0.0625 |
| 2026 | Czech Republic | Europe | finalist | ridge | 0.0625 |
| 2026 | Scotland | Europe | finalist | ridge | 0.0625 |
| 2026 | Tunisia | Africa | finalist | ridge | 0.0625 |
| 2026 | DR Congo | Africa | finalist | ridge | 0.0625 |
| 2026 | Uzbekistan | Asia | finalist | ridge | 0.0625 |
| 2026 | Qatar | Asia | finalist | ridge | 0.0625 |
| 2026 | Iraq | Asia | finalist | ridge | 0.0625 |
| 2026 | South Africa | Africa | finalist | ridge | 0.0625 |
| 2026 | Saudi Arabia | Asia | finalist | ridge | 0.0625 |
| 2026 | Jordan | Asia | finalist | ridge | 0.0625 |
| 2026 | Bosnia and Herzegovina | Europe | finalist | ridge | 0.0625 |
| 2026 | Cape Verde | Africa | finalist | ridge | 0.0625 |
| 2026 | Ghana | Africa | finalist | ridge | 0.0625 |
| 2026 | Cura?o | North America | finalist | ridge | 0.0625 |
| 2026 | Haiti | North America | finalist | ridge | 0.0625 |
| 2026 | New Zealand | Oceania | finalist | ridge | 0.0625 |
| 2026 | Brazil | South America | quarter_finalist | elastic_net | 0.536041403 |
| 2026 | France | Europe | quarter_finalist | elastic_net | 0.526260751 |
| 2026 | Germany | Europe | quarter_finalist | elastic_net | 0.51270838 |
| 2026 | England | Europe | quarter_finalist | elastic_net | 0.483064202 |
| 2026 | Spain | Europe | quarter_finalist | elastic_net | 0.435851339 |
| 2026 | Argentina | South America | quarter_finalist | elastic_net | 0.387616516 |
| 2026 | Netherlands | Europe | quarter_finalist | elastic_net | 0.36815561 |
| 2026 | Portugal | Europe | quarter_finalist | elastic_net | 0.338536273 |
| 2026 | Uruguay | South America | quarter_finalist | elastic_net | 0.302815765 |
| 2026 | Sweden | Europe | quarter_finalist | elastic_net | 0.285730807 |
| 2026 | Turkey | Europe | quarter_finalist | elastic_net | 0.263526651 |
| 2026 | Belgium | Europe | quarter_finalist | elastic_net | 0.26190218 |
| 2026 | Norway | Europe | quarter_finalist | elastic_net | 0.258041044 |
| 2026 | Morocco | Africa | quarter_finalist | elastic_net | 0.251650398 |
| 2026 | Senegal | Africa | quarter_finalist | elastic_net | 0.243109058 |
| 2026 | Croatia | Europe | quarter_finalist | elastic_net | 0.234212425 |
| 2026 | Ivory Coast | Africa | quarter_finalist | elastic_net | 0.233959797 |
| 2026 | Ecuador | South America | quarter_finalist | elastic_net | 0.231361115 |
| 2026 | Colombia | South America | quarter_finalist | elastic_net | 0.223292177 |
| 2026 | Switzerland | Europe | quarter_finalist | elastic_net | 0.222043164 |
| 2026 | Austria | Europe | quarter_finalist | elastic_net | 0.22145315 |
| 2026 | Japan | Asia | quarter_finalist | elastic_net | 0.212400581 |
| 2026 | Czech Republic | Europe | quarter_finalist | elastic_net | 0.21237676 |
| 2026 | Algeria | Africa | quarter_finalist | elastic_net | 0.211606275 |
| 2026 | United States | North America | quarter_finalist | elastic_net | 0.210384227 |
| 2026 | Scotland | Europe | quarter_finalist | elastic_net | 0.207783718 |
| 2026 | Mexico | North America | quarter_finalist | elastic_net | 0.204273903 |
| 2026 | Ghana | Africa | quarter_finalist | elastic_net | 0.201263093 |
| 2026 | South Korea | Asia | quarter_finalist | elastic_net | 0.199442169 |
| 2026 | Egypt | Africa | quarter_finalist | elastic_net | 0.197357534 |
| 2026 | Paraguay | South America | quarter_finalist | elastic_net | 0.197354678 |
| 2026 | DR Congo | Africa | quarter_finalist | elastic_net | 0.195931276 |
| 2026 | Bosnia and Herzegovina | Europe | quarter_finalist | elastic_net | 0.192740858 |
| 2026 | Tunisia | Africa | quarter_finalist | elastic_net | 0.186476763 |
| 2026 | Australia | Oceania | quarter_finalist | elastic_net | 0.182859948 |
| 2026 | Iran | Asia | quarter_finalist | elastic_net | 0.182566445 |
| 2026 | South Africa | Africa | quarter_finalist | elastic_net | 0.18243631 |
| 2026 | Haiti | North America | quarter_finalist | elastic_net | 0.18072281 |
| 2026 | Canada | North America | quarter_finalist | elastic_net | 0.180479598 |
| 2026 | Cape Verde | Africa | quarter_finalist | elastic_net | 0.180315876 |
| 2026 | Saudi Arabia | Asia | quarter_finalist | elastic_net | 0.179601758 |
| 2026 | Qatar | Asia | quarter_finalist | elastic_net | 0.178952999 |
| 2026 | Cura?o | North America | quarter_finalist | elastic_net | 0.178908276 |
| 2026 | Uzbekistan | Asia | quarter_finalist | elastic_net | 0.178715026 |
| 2026 | Panama | North America | quarter_finalist | elastic_net | 0.178067353 |
| 2026 | Iraq | Asia | quarter_finalist | elastic_net | 0.177868196 |
| 2026 | New Zealand | Oceania | quarter_finalist | elastic_net | 0.177557784 |
| 2026 | Jordan | Asia | quarter_finalist | elastic_net | 0.177440703 |
| 2026 | England | Europe | quarter_finalist | lasso | 0.483248085 |
| 2026 | France | Europe | quarter_finalist | lasso | 0.48225869 |
| 2026 | Spain | Europe | quarter_finalist | lasso | 0.44300937 |
| 2026 | Brazil | South America | quarter_finalist | lasso | 0.392466206 |
| 2026 | Germany | Europe | quarter_finalist | lasso | 0.36446008 |
| 2026 | Portugal | Europe | quarter_finalist | lasso | 0.361385631 |
| 2026 | Netherlands | Europe | quarter_finalist | lasso | 0.353205495 |
| 2026 | Argentina | South America | quarter_finalist | lasso | 0.30237713 |
| 2026 | Turkey | Europe | quarter_finalist | lasso | 0.283206355 |
| 2026 | Norway | Europe | quarter_finalist | lasso | 0.282046361 |
| 2026 | Sweden | Europe | quarter_finalist | lasso | 0.280536155 |
| 2026 | Belgium | Europe | quarter_finalist | lasso | 0.268969128 |
| 2026 | Morocco | Africa | quarter_finalist | lasso | 0.267559968 |
| 2026 | Uruguay | South America | quarter_finalist | lasso | 0.266779859 |
| 2026 | Senegal | Africa | quarter_finalist | lasso | 0.261334328 |
| 2026 | Ivory Coast | Africa | quarter_finalist | lasso | 0.254086428 |
| 2026 | Ecuador | South America | quarter_finalist | lasso | 0.249769459 |
| 2026 | Colombia | South America | quarter_finalist | lasso | 0.236954727 |
| 2026 | Croatia | Europe | quarter_finalist | lasso | 0.231802184 |
| 2026 | Switzerland | Europe | quarter_finalist | lasso | 0.230363619 |
| 2026 | Austria | Europe | quarter_finalist | lasso | 0.22672839 |
| 2026 | Algeria | Africa | quarter_finalist | lasso | 0.226198898 |
| 2026 | Japan | Asia | quarter_finalist | lasso | 0.225142542 |
| 2026 | Scotland | Europe | quarter_finalist | lasso | 0.222881377 |
| 2026 | United States | North America | quarter_finalist | lasso | 0.215172761 |
| 2026 | Ghana | Africa | quarter_finalist | lasso | 0.214299019 |
| 2026 | Mexico | North America | quarter_finalist | lasso | 0.210184024 |
| 2026 | Egypt | Africa | quarter_finalist | lasso | 0.209128672 |
| 2026 | DR Congo | Africa | quarter_finalist | lasso | 0.208745065 |
| 2026 | Paraguay | South America | quarter_finalist | lasso | 0.20694994 |
| 2026 | South Korea | Asia | quarter_finalist | lasso | 0.206039006 |
| 2026 | Bosnia and Herzegovina | Europe | quarter_finalist | lasso | 0.20586247 |
| 2026 | Czech Republic | Europe | quarter_finalist | lasso | 0.205527361 |
| 2026 | Tunisia | Africa | quarter_finalist | lasso | 0.197289557 |
| 2026 | South Africa | Africa | quarter_finalist | lasso | 0.19321876 |
| 2026 | Haiti | North America | quarter_finalist | lasso | 0.192261386 |
| 2026 | Iran | Asia | quarter_finalist | lasso | 0.191508121 |
| 2026 | Australia | Oceania | quarter_finalist | lasso | 0.191274232 |
| 2026 | Cape Verde | Africa | quarter_finalist | lasso | 0.191103964 |
| 2026 | Cura?o | North America | quarter_finalist | lasso | 0.190029952 |
| 2026 | Canada | North America | quarter_finalist | lasso | 0.189449091 |
| 2026 | Saudi Arabia | Asia | quarter_finalist | lasso | 0.18943583 |
| 2026 | Qatar | Asia | quarter_finalist | lasso | 0.188806757 |
| 2026 | New Zealand | Oceania | quarter_finalist | lasso | 0.188547318 |
| 2026 | Uzbekistan | Asia | quarter_finalist | lasso | 0.188286503 |
| 2026 | Iraq | Asia | quarter_finalist | lasso | 0.187602773 |
| 2026 | Jordan | Asia | quarter_finalist | lasso | 0.187372547 |
| 2026 | Panama | North America | quarter_finalist | lasso | 0.18671596 |
| 2026 | Brazil | South America | quarter_finalist | ridge | 0.528745358 |
| 2026 | Germany | Europe | quarter_finalist | ridge | 0.510760768 |
| 2026 | Argentina | South America | quarter_finalist | ridge | 0.461918083 |
| 2026 | France | Europe | quarter_finalist | ridge | 0.435623355 |
| 2026 | England | Europe | quarter_finalist | ridge | 0.402818429 |
| 2026 | Spain | Europe | quarter_finalist | ridge | 0.390241545 |
| 2026 | Netherlands | Europe | quarter_finalist | ridge | 0.36001269 |
| 2026 | Uruguay | South America | quarter_finalist | ridge | 0.340571799 |
| 2026 | Portugal | Europe | quarter_finalist | ridge | 0.306040088 |
| 2026 | Belgium | Europe | quarter_finalist | ridge | 0.302237167 |
| 2026 | Mexico | North America | quarter_finalist | ridge | 0.285721019 |
| 2026 | Sweden | Europe | quarter_finalist | ridge | 0.283121954 |
| 2026 | Switzerland | Europe | quarter_finalist | ridge | 0.270901081 |
| 2026 | Morocco | Africa | quarter_finalist | ridge | 0.270669871 |
| 2026 | United States | North America | quarter_finalist | ridge | 0.266803812 |
| 2026 | Croatia | Europe | quarter_finalist | ridge | 0.264595534 |
| 2026 | Colombia | South America | quarter_finalist | ridge | 0.255677271 |
| 2026 | Czech Republic | Europe | quarter_finalist | ridge | 0.254112204 |
| 2026 | Austria | Europe | quarter_finalist | ridge | 0.25172481 |
| 2026 | Senegal | Africa | quarter_finalist | ridge | 0.251612593 |
| 2026 | Ecuador | South America | quarter_finalist | ridge | 0.240969955 |
| 2026 | Norway | Europe | quarter_finalist | ridge | 0.24035022 |
| 2026 | Japan | Asia | quarter_finalist | ridge | 0.236775978 |
| 2026 | Algeria | Africa | quarter_finalist | ridge | 0.233735387 |
| 2026 | Turkey | Europe | quarter_finalist | ridge | 0.233074015 |
| 2026 | Paraguay | South America | quarter_finalist | ridge | 0.224975938 |
| 2026 | South Korea | Asia | quarter_finalist | ridge | 0.22256442 |
| 2026 | Ivory Coast | Africa | quarter_finalist | ridge | 0.220396225 |
| 2026 | Canada | North America | quarter_finalist | ridge | 0.219284226 |
| 2026 | Egypt | Africa | quarter_finalist | ridge | 0.217564453 |
| 2026 | Iran | Asia | quarter_finalist | ridge | 0.205784469 |
| 2026 | Australia | Oceania | quarter_finalist | ridge | 0.202891955 |
| 2026 | Tunisia | Africa | quarter_finalist | ridge | 0.202732141 |
| 2026 | DR Congo | Africa | quarter_finalist | ridge | 0.199791913 |
| 2026 | Scotland | Europe | quarter_finalist | ridge | 0.198527387 |
| 2026 | South Africa | Africa | quarter_finalist | ridge | 0.194686751 |
| 2026 | Ghana | Africa | quarter_finalist | ridge | 0.188593733 |
| 2026 | Uzbekistan | Asia | quarter_finalist | ridge | 0.187680411 |
| 2026 | Panama | North America | quarter_finalist | ridge | 0.185813257 |
| 2026 | Bosnia and Herzegovina | Europe | quarter_finalist | ridge | 0.177051094 |
| 2026 | Cape Verde | Africa | quarter_finalist | ridge | 0.176611834 |
| 2026 | Iraq | Asia | quarter_finalist | ridge | 0.175480012 |
| 2026 | Haiti | North America | quarter_finalist | ridge | 0.171130244 |
| 2026 | Saudi Arabia | Asia | quarter_finalist | ridge | 0.168707895 |
| 2026 | Cura?o | North America | quarter_finalist | ridge | 0.165302472 |
| 2026 | Jordan | Asia | quarter_finalist | ridge | 0.165021654 |
| 2026 | Qatar | Asia | quarter_finalist | ridge | 0.164666377 |
| 2026 | New Zealand | Oceania | quarter_finalist | ridge | 0.161034979 |
| 2026 | France | Europe | semi_finalist | elastic_net | 0.216931848 |
| 2026 | England | Europe | semi_finalist | elastic_net | 0.211990002 |
| 2026 | Spain | Europe | semi_finalist | elastic_net | 0.195323115 |
| 2026 | Brazil | South America | semi_finalist | elastic_net | 0.184770474 |
| 2026 | Germany | Europe | semi_finalist | elastic_net | 0.17716143 |
| 2026 | Netherlands | Europe | semi_finalist | elastic_net | 0.166095314 |
| 2026 | Portugal | Europe | semi_finalist | elastic_net | 0.165487351 |
| 2026 | Argentina | South America | semi_finalist | elastic_net | 0.148135849 |
| 2026 | Sweden | Europe | semi_finalist | elastic_net | 0.136798018 |
| 2026 | Turkey | Europe | semi_finalist | elastic_net | 0.135988992 |
| 2026 | Norway | Europe | semi_finalist | elastic_net | 0.134147126 |
| 2026 | Uruguay | South America | semi_finalist | elastic_net | 0.133246516 |
| 2026 | Belgium | Europe | semi_finalist | elastic_net | 0.132742299 |
| 2026 | Morocco | Africa | semi_finalist | elastic_net | 0.131471986 |
| 2026 | Senegal | Africa | semi_finalist | elastic_net | 0.128109072 |
| 2026 | Ivory Coast | Africa | semi_finalist | elastic_net | 0.124390786 |
| 2026 | Ecuador | South America | semi_finalist | elastic_net | 0.12357077 |
| 2026 | Croatia | Europe | semi_finalist | elastic_net | 0.120533491 |
| 2026 | Colombia | South America | semi_finalist | elastic_net | 0.119729012 |
| 2026 | Switzerland | Europe | semi_finalist | elastic_net | 0.117089394 |
| 2026 | Austria | Europe | semi_finalist | elastic_net | 0.117051447 |
| 2026 | Japan | Asia | semi_finalist | elastic_net | 0.115328132 |
| 2026 | Algeria | Africa | semi_finalist | elastic_net | 0.11512927 |
| 2026 | Scotland | Europe | semi_finalist | elastic_net | 0.113137803 |
| 2026 | United States | North America | semi_finalist | elastic_net | 0.112684636 |
| 2026 | Mexico | North America | semi_finalist | elastic_net | 0.110251502 |
| 2026 | Egypt | Africa | semi_finalist | elastic_net | 0.109120984 |
| 2026 | South Korea | Asia | semi_finalist | elastic_net | 0.108963003 |
| 2026 | Czech Republic | Europe | semi_finalist | elastic_net | 0.108936294 |
| 2026 | Ghana | Africa | semi_finalist | elastic_net | 0.10848836 |
| 2026 | DR Congo | Africa | semi_finalist | elastic_net | 0.108072686 |
| 2026 | Paraguay | South America | semi_finalist | elastic_net | 0.107767602 |
| 2026 | Bosnia and Herzegovina | Europe | semi_finalist | elastic_net | 0.106063316 |
| 2026 | Tunisia | Africa | semi_finalist | elastic_net | 0.104172162 |
| 2026 | Iran | Asia | semi_finalist | elastic_net | 0.103313057 |
| 2026 | Australia | Oceania | semi_finalist | elastic_net | 0.102921399 |
| 2026 | Canada | North America | semi_finalist | elastic_net | 0.10211822 |
| 2026 | South Africa | Africa | semi_finalist | elastic_net | 0.101922454 |
| 2026 | Panama | North America | semi_finalist | elastic_net | 0.100992205 |
| 2026 | Cape Verde | Africa | semi_finalist | elastic_net | 0.100727313 |
| 2026 | Uzbekistan | Asia | semi_finalist | elastic_net | 0.100693287 |
| 2026 | Qatar | Asia | semi_finalist | elastic_net | 0.100625397 |
| 2026 | Saudi Arabia | Asia | semi_finalist | elastic_net | 0.100545147 |
| 2026 | Haiti | North America | semi_finalist | elastic_net | 0.100426702 |
| 2026 | Iraq | Asia | semi_finalist | elastic_net | 0.100100723 |
| 2026 | Jordan | Asia | semi_finalist | elastic_net | 0.099719889 |
| 2026 | Cura?o | North America | semi_finalist | elastic_net | 0.099701599 |
| 2026 | New Zealand | Oceania | semi_finalist | elastic_net | 0.099036756 |
| 2026 | England | Europe | semi_finalist | lasso | 0.244540252 |
| 2026 | France | Europe | semi_finalist | lasso | 0.242940036 |
| 2026 | Spain | Europe | semi_finalist | lasso | 0.221289913 |
| 2026 | Brazil | South America | semi_finalist | lasso | 0.190399542 |
| 2026 | Portugal | Europe | semi_finalist | lasso | 0.178518759 |
| 2026 | Germany | Europe | semi_finalist | lasso | 0.176869726 |
| 2026 | Netherlands | Europe | semi_finalist | lasso | 0.174356144 |
| 2026 | Argentina | South America | semi_finalist | lasso | 0.147124256 |
| 2026 | Turkey | Europe | semi_finalist | lasso | 0.139995538 |
| 2026 | Norway | Europe | semi_finalist | lasso | 0.139442502 |
| 2026 | Sweden | Europe | semi_finalist | lasso | 0.138723183 |
| 2026 | Belgium | Europe | semi_finalist | lasso | 0.133238488 |
| 2026 | Morocco | Africa | semi_finalist | lasso | 0.132573195 |
| 2026 | Uruguay | South America | semi_finalist | lasso | 0.130949435 |
| 2026 | Senegal | Africa | semi_finalist | lasso | 0.129641065 |
| 2026 | Ivory Coast | Africa | semi_finalist | lasso | 0.126241504 |
| 2026 | Ecuador | South America | semi_finalist | lasso | 0.12422347 |
| 2026 | Colombia | South America | semi_finalist | lasso | 0.118260644 |
| 2026 | Croatia | Europe | semi_finalist | lasso | 0.115873861 |
| 2026 | Switzerland | Europe | semi_finalist | lasso | 0.115208501 |
| 2026 | Austria | Europe | semi_finalist | lasso | 0.113529046 |
| 2026 | Algeria | Africa | semi_finalist | lasso | 0.113284645 |
| 2026 | Japan | Asia | semi_finalist | lasso | 0.112797219 |
| 2026 | Scotland | Europe | semi_finalist | lasso | 0.111754588 |
| 2026 | United States | North America | semi_finalist | lasso | 0.1082071 |
| 2026 | Ghana | Africa | semi_finalist | lasso | 0.107805648 |
| 2026 | Mexico | North America | semi_finalist | lasso | 0.105916591 |
| 2026 | Egypt | Africa | semi_finalist | lasso | 0.105432531 |
| 2026 | DR Congo | Africa | semi_finalist | lasso | 0.105256622 |
| 2026 | Paraguay | South America | semi_finalist | lasso | 0.104433721 |
| 2026 | South Korea | Asia | semi_finalist | lasso | 0.104016314 |
| 2026 | Bosnia and Herzegovina | Europe | semi_finalist | lasso | 0.103935436 |
| 2026 | Czech Republic | Europe | semi_finalist | lasso | 0.103781919 |
| 2026 | Tunisia | Africa | semi_finalist | lasso | 0.100012609 |
| 2026 | South Africa | Africa | semi_finalist | lasso | 0.098152818 |
| 2026 | Haiti | North America | semi_finalist | lasso | 0.097715669 |
| 2026 | Iran | Asia | semi_finalist | lasso | 0.09737178 |
| 2026 | Australia | Oceania | semi_finalist | lasso | 0.097265012 |
| 2026 | Cape Verde | Africa | semi_finalist | lasso | 0.09718729 |
| 2026 | Cura?o | North America | semi_finalist | lasso | 0.096697095 |
| 2026 | Canada | North America | semi_finalist | lasso | 0.096432023 |
| 2026 | Saudi Arabia | Asia | semi_finalist | lasso | 0.096425971 |
| 2026 | Qatar | Asia | semi_finalist | lasso | 0.09613893 |
| 2026 | New Zealand | Oceania | semi_finalist | lasso | 0.096020559 |
| 2026 | Uzbekistan | Asia | semi_finalist | lasso | 0.095901567 |
| 2026 | Iraq | Asia | semi_finalist | lasso | 0.09558965 |
| 2026 | Jordan | Asia | semi_finalist | lasso | 0.095484629 |
| 2026 | Panama | North America | semi_finalist | lasso | 0.09518514 |
| 2026 | Germany | Europe | semi_finalist | ridge | 0.168171121 |
| 2026 | Brazil | South America | semi_finalist | ridge | 0.164936596 |
| 2026 | Argentina | South America | semi_finalist | ridge | 0.15809166 |
| 2026 | France | Europe | semi_finalist | ridge | 0.157309741 |
| 2026 | England | Europe | semi_finalist | ridge | 0.151835633 |
| 2026 | Spain | Europe | semi_finalist | ridge | 0.151303902 |
| 2026 | Netherlands | Europe | semi_finalist | ridge | 0.145471045 |
| 2026 | Portugal | Europe | semi_finalist | ridge | 0.137441033 |
| 2026 | Uruguay | South America | semi_finalist | ridge | 0.136255572 |
| 2026 | Belgium | Europe | semi_finalist | ridge | 0.135526257 |
| 2026 | Mexico | North America | semi_finalist | ridge | 0.132183469 |
| 2026 | Sweden | Europe | semi_finalist | ridge | 0.131895341 |
| 2026 | Morocco | Africa | semi_finalist | ridge | 0.131660318 |
| 2026 | United States | North America | semi_finalist | ridge | 0.129440505 |
| 2026 | Switzerland | Europe | semi_finalist | ridge | 0.129348199 |
| 2026 | Croatia | Europe | semi_finalist | ridge | 0.129209856 |
| 2026 | Senegal | Africa | semi_finalist | ridge | 0.12745887 |
| 2026 | Austria | Europe | semi_finalist | ridge | 0.127342995 |
| 2026 | Czech Republic | Europe | semi_finalist | ridge | 0.12688083 |
| 2026 | Japan | Asia | semi_finalist | ridge | 0.126433349 |
| 2026 | Norway | Europe | semi_finalist | ridge | 0.125107999 |
| 2026 | Algeria | Africa | semi_finalist | ridge | 0.124578869 |
| 2026 | Colombia | South America | semi_finalist | ridge | 0.124349334 |
| 2026 | Turkey | Europe | semi_finalist | ridge | 0.123543609 |
| 2026 | South Korea | Asia | semi_finalist | ridge | 0.12206612 |
| 2026 | Ivory Coast | Africa | semi_finalist | ridge | 0.120919534 |
| 2026 | Ecuador | South America | semi_finalist | ridge | 0.120534892 |
| 2026 | Egypt | Africa | semi_finalist | ridge | 0.11993425 |
| 2026 | Canada | North America | semi_finalist | ridge | 0.119729828 |
| 2026 | Iran | Asia | semi_finalist | ridge | 0.119651657 |
| 2026 | Australia | Oceania | semi_finalist | ridge | 0.118052846 |
| 2026 | Paraguay | South America | semi_finalist | ridge | 0.116827524 |
| 2026 | Tunisia | Africa | semi_finalist | ridge | 0.116373554 |
| 2026 | DR Congo | Africa | semi_finalist | ridge | 0.115746728 |
| 2026 | Scotland | Europe | semi_finalist | ridge | 0.115662577 |
| 2026 | Uzbekistan | Asia | semi_finalist | ridge | 0.115068124 |
| 2026 | South Africa | Africa | semi_finalist | ridge | 0.11465334 |
| 2026 | Panama | North America | semi_finalist | ridge | 0.113760384 |
| 2026 | Ghana | Africa | semi_finalist | ridge | 0.112602703 |
| 2026 | Iraq | Asia | semi_finalist | ridge | 0.112583166 |
| 2026 | Bosnia and Herzegovina | Europe | semi_finalist | ridge | 0.110758152 |
| 2026 | Cape Verde | Africa | semi_finalist | ridge | 0.11030819 |
| 2026 | Saudi Arabia | Asia | semi_finalist | ridge | 0.110134773 |
| 2026 | Jordan | Asia | semi_finalist | ridge | 0.110067417 |
| 2026 | Qatar | Asia | semi_finalist | ridge | 0.109661623 |
| 2026 | Haiti | North America | semi_finalist | ridge | 0.109581563 |
| 2026 | New Zealand | Oceania | semi_finalist | ridge | 0.108013171 |
| 2026 | Cura?o | North America | semi_finalist | ridge | 0.107644254 |
| 2026 | France | Europe | winner | elastic_net | 0.03125 |
| 2026 | Spain | Europe | winner | elastic_net | 0.03125 |
| 2026 | Argentina | South America | winner | elastic_net | 0.03125 |
| 2026 | England | Europe | winner | elastic_net | 0.03125 |
| 2026 | Portugal | Europe | winner | elastic_net | 0.03125 |
| 2026 | Brazil | South America | winner | elastic_net | 0.03125 |
| 2026 | Netherlands | Europe | winner | elastic_net | 0.03125 |
| 2026 | Morocco | Africa | winner | elastic_net | 0.03125 |
| 2026 | Belgium | Europe | winner | elastic_net | 0.03125 |
| 2026 | Germany | Europe | winner | elastic_net | 0.03125 |
| 2026 | Croatia | Europe | winner | elastic_net | 0.03125 |
| 2026 | Colombia | South America | winner | elastic_net | 0.03125 |
| 2026 | Senegal | Africa | winner | elastic_net | 0.03125 |
| 2026 | Mexico | North America | winner | elastic_net | 0.03125 |
| 2026 | United States | North America | winner | elastic_net | 0.03125 |
| 2026 | Uruguay | South America | winner | elastic_net | 0.03125 |
| 2026 | Japan | Asia | winner | elastic_net | 0.03125 |
| 2026 | Switzerland | Europe | winner | elastic_net | 0.03125 |
| 2026 | Iran | Asia | winner | elastic_net | 0.03125 |
| 2026 | Turkey | Europe | winner | elastic_net | 0.03125 |
| 2026 | Ecuador | South America | winner | elastic_net | 0.03125 |
| 2026 | Austria | Europe | winner | elastic_net | 0.03125 |
| 2026 | South Korea | Asia | winner | elastic_net | 0.03125 |
| 2026 | Australia | Oceania | winner | elastic_net | 0.03125 |
| 2026 | Algeria | Africa | winner | elastic_net | 0.03125 |
| 2026 | Egypt | Africa | winner | elastic_net | 0.03125 |
| 2026 | Canada | North America | winner | elastic_net | 0.03125 |
| 2026 | Norway | Europe | winner | elastic_net | 0.03125 |
| 2026 | Panama | North America | winner | elastic_net | 0.03125 |
| 2026 | Ivory Coast | Africa | winner | elastic_net | 0.03125 |
| 2026 | Sweden | Europe | winner | elastic_net | 0.03125 |
| 2026 | Paraguay | South America | winner | elastic_net | 0.03125 |
| 2026 | Czech Republic | Europe | winner | elastic_net | 0.03125 |
| 2026 | Scotland | Europe | winner | elastic_net | 0.03125 |
| 2026 | Tunisia | Africa | winner | elastic_net | 0.03125 |
| 2026 | DR Congo | Africa | winner | elastic_net | 0.03125 |
| 2026 | Uzbekistan | Asia | winner | elastic_net | 0.03125 |
| 2026 | Qatar | Asia | winner | elastic_net | 0.03125 |
| 2026 | Iraq | Asia | winner | elastic_net | 0.03125 |
| 2026 | South Africa | Africa | winner | elastic_net | 0.03125 |
| 2026 | Saudi Arabia | Asia | winner | elastic_net | 0.03125 |
| 2026 | Jordan | Asia | winner | elastic_net | 0.03125 |
| 2026 | Bosnia and Herzegovina | Europe | winner | elastic_net | 0.03125 |
| 2026 | Cape Verde | Africa | winner | elastic_net | 0.03125 |
| 2026 | Ghana | Africa | winner | elastic_net | 0.03125 |
| 2026 | Cura?o | North America | winner | elastic_net | 0.03125 |
| 2026 | Haiti | North America | winner | elastic_net | 0.03125 |
| 2026 | New Zealand | Oceania | winner | elastic_net | 0.03125 |
| 2026 | France | Europe | winner | lasso | 0.03125 |
| 2026 | Spain | Europe | winner | lasso | 0.03125 |
| 2026 | Argentina | South America | winner | lasso | 0.03125 |
| 2026 | England | Europe | winner | lasso | 0.03125 |
| 2026 | Portugal | Europe | winner | lasso | 0.03125 |
| 2026 | Brazil | South America | winner | lasso | 0.03125 |
| 2026 | Netherlands | Europe | winner | lasso | 0.03125 |
| 2026 | Morocco | Africa | winner | lasso | 0.03125 |
| 2026 | Belgium | Europe | winner | lasso | 0.03125 |
| 2026 | Germany | Europe | winner | lasso | 0.03125 |
| 2026 | Croatia | Europe | winner | lasso | 0.03125 |
| 2026 | Colombia | South America | winner | lasso | 0.03125 |
| 2026 | Senegal | Africa | winner | lasso | 0.03125 |
| 2026 | Mexico | North America | winner | lasso | 0.03125 |
| 2026 | United States | North America | winner | lasso | 0.03125 |
| 2026 | Uruguay | South America | winner | lasso | 0.03125 |
| 2026 | Japan | Asia | winner | lasso | 0.03125 |
| 2026 | Switzerland | Europe | winner | lasso | 0.03125 |
| 2026 | Iran | Asia | winner | lasso | 0.03125 |
| 2026 | Turkey | Europe | winner | lasso | 0.03125 |
| 2026 | Ecuador | South America | winner | lasso | 0.03125 |
| 2026 | Austria | Europe | winner | lasso | 0.03125 |
| 2026 | South Korea | Asia | winner | lasso | 0.03125 |
| 2026 | Australia | Oceania | winner | lasso | 0.03125 |
| 2026 | Algeria | Africa | winner | lasso | 0.03125 |
| 2026 | Egypt | Africa | winner | lasso | 0.03125 |
| 2026 | Canada | North America | winner | lasso | 0.03125 |
| 2026 | Norway | Europe | winner | lasso | 0.03125 |
| 2026 | Panama | North America | winner | lasso | 0.03125 |
| 2026 | Ivory Coast | Africa | winner | lasso | 0.03125 |
| 2026 | Sweden | Europe | winner | lasso | 0.03125 |
| 2026 | Paraguay | South America | winner | lasso | 0.03125 |
| 2026 | Czech Republic | Europe | winner | lasso | 0.03125 |
| 2026 | Scotland | Europe | winner | lasso | 0.03125 |
| 2026 | Tunisia | Africa | winner | lasso | 0.03125 |
| 2026 | DR Congo | Africa | winner | lasso | 0.03125 |
| 2026 | Uzbekistan | Asia | winner | lasso | 0.03125 |
| 2026 | Qatar | Asia | winner | lasso | 0.03125 |
| 2026 | Iraq | Asia | winner | lasso | 0.03125 |
| 2026 | South Africa | Africa | winner | lasso | 0.03125 |
| 2026 | Saudi Arabia | Asia | winner | lasso | 0.03125 |
| 2026 | Jordan | Asia | winner | lasso | 0.03125 |
| 2026 | Bosnia and Herzegovina | Europe | winner | lasso | 0.03125 |
| 2026 | Cape Verde | Africa | winner | lasso | 0.03125 |
| 2026 | Ghana | Africa | winner | lasso | 0.03125 |
| 2026 | Cura?o | North America | winner | lasso | 0.03125 |
| 2026 | Haiti | North America | winner | lasso | 0.03125 |
| 2026 | New Zealand | Oceania | winner | lasso | 0.03125 |
| 2026 | France | Europe | winner | ridge | 0.03125 |
| 2026 | Spain | Europe | winner | ridge | 0.03125 |
| 2026 | Argentina | South America | winner | ridge | 0.03125 |
| 2026 | England | Europe | winner | ridge | 0.03125 |
| 2026 | Portugal | Europe | winner | ridge | 0.03125 |
| 2026 | Brazil | South America | winner | ridge | 0.03125 |
| 2026 | Netherlands | Europe | winner | ridge | 0.03125 |
| 2026 | Morocco | Africa | winner | ridge | 0.03125 |
| 2026 | Belgium | Europe | winner | ridge | 0.03125 |
| 2026 | Germany | Europe | winner | ridge | 0.03125 |
| 2026 | Croatia | Europe | winner | ridge | 0.03125 |
| 2026 | Colombia | South America | winner | ridge | 0.03125 |
| 2026 | Senegal | Africa | winner | ridge | 0.03125 |
| 2026 | Mexico | North America | winner | ridge | 0.03125 |
| 2026 | United States | North America | winner | ridge | 0.03125 |
| 2026 | Uruguay | South America | winner | ridge | 0.03125 |
| 2026 | Japan | Asia | winner | ridge | 0.03125 |
| 2026 | Switzerland | Europe | winner | ridge | 0.03125 |
| 2026 | Iran | Asia | winner | ridge | 0.03125 |
| 2026 | Turkey | Europe | winner | ridge | 0.03125 |
| 2026 | Ecuador | South America | winner | ridge | 0.03125 |
| 2026 | Austria | Europe | winner | ridge | 0.03125 |
| 2026 | South Korea | Asia | winner | ridge | 0.03125 |
| 2026 | Australia | Oceania | winner | ridge | 0.03125 |
| 2026 | Algeria | Africa | winner | ridge | 0.03125 |
| 2026 | Egypt | Africa | winner | ridge | 0.03125 |
| 2026 | Canada | North America | winner | ridge | 0.03125 |
| 2026 | Norway | Europe | winner | ridge | 0.03125 |
| 2026 | Panama | North America | winner | ridge | 0.03125 |
| 2026 | Ivory Coast | Africa | winner | ridge | 0.03125 |
| 2026 | Sweden | Europe | winner | ridge | 0.03125 |
| 2026 | Paraguay | South America | winner | ridge | 0.03125 |
| 2026 | Czech Republic | Europe | winner | ridge | 0.03125 |
| 2026 | Scotland | Europe | winner | ridge | 0.03125 |
| 2026 | Tunisia | Africa | winner | ridge | 0.03125 |
| 2026 | DR Congo | Africa | winner | ridge | 0.03125 |
| 2026 | Uzbekistan | Asia | winner | ridge | 0.03125 |
| 2026 | Qatar | Asia | winner | ridge | 0.03125 |
| 2026 | Iraq | Asia | winner | ridge | 0.03125 |
| 2026 | South Africa | Africa | winner | ridge | 0.03125 |
| 2026 | Saudi Arabia | Asia | winner | ridge | 0.03125 |
| 2026 | Jordan | Asia | winner | ridge | 0.03125 |
| 2026 | Bosnia and Herzegovina | Europe | winner | ridge | 0.03125 |
| 2026 | Cape Verde | Africa | winner | ridge | 0.03125 |
| 2026 | Ghana | Africa | winner | ridge | 0.03125 |
| 2026 | Cura?o | North America | winner | ridge | 0.03125 |
| 2026 | Haiti | North America | winner | ridge | 0.03125 |
| 2026 | New Zealand | Oceania | winner | ridge | 0.03125 |

**Supplementary Table S10**

**Optimal Classification Thresholds Based on the Youden Index**

| outcome | model | optimal_threshold |
| --- | --- | --- |
| quarter_finalist | ridge | 0.234002368 |
| quarter_finalist | lasso | 0.248040594 |
| quarter_finalist | elastic_net | 0.236055683 |
| semi_finalist | ridge | 0.122798953 |
| semi_finalist | lasso | 0.125360434 |
| semi_finalist | elastic_net | 0.122719507 |
| finalist | ridge | 0.5 |
| finalist | lasso | 0.054013974 |
| finalist | elastic_net | 0.059395839 |
| winner | ridge | 0.5 |
| winner | lasso | 0.5 |
| winner | elastic_net | 0.5 |

**Supplementary Table S11**

**DeLong ROC Comparisons**

**Supplementary Table S11**

**Baseline Logistic Regression Odds Ratios**

**Supplementary Table S12**

**Predicted Probabilities of FIFA World Cup 2026 Tournament Progression Using Baseline Logistic Regression**

| Version | Team | Continent | Outcome | Model | Predicted Probability |
| --- | --- | --- | --- | --- | --- |
| 2026 | France | Europe | finalist | baseline_logistic | 0.5217 |
| 2026 | Netherlands | Europe | finalist | baseline_logistic | 0.3606 |
| 2026 | England | Europe | finalist | baseline_logistic | 0.2897 |
| 2026 | Spain | Europe | finalist | baseline_logistic | 0.2889 |
| 2026 | Argentina | South America | finalist | baseline_logistic | 0.2654 |
| 2026 | Brazil | South America | quarter_finalist | baseline_logistic | 0.8393 |
| 2026 | France | Europe | quarter_finalist | baseline_logistic | 0.8285 |
| 2026 | England | Europe | quarter_finalist | baseline_logistic | 0.7637 |
| 2026 | Germany | Europe | quarter_finalist | baseline_logistic | 0.7537 |
| 2026 | Spain | Europe | quarter_finalist | baseline_logistic | 0.7238 |
| 2026 | France | Europe | semi_finalist | baseline_logistic | 0.6282 |
| 2026 | Netherlands | Europe | semi_finalist | baseline_logistic | 0.5734 |
| 2026 | Germany | Europe | semi_finalist | baseline_logistic | 0.4871 |
| 2026 | England | Europe | semi_finalist | baseline_logistic | 0.4296 |
| 2026 | Spain | Europe | semi_finalist | baseline_logistic | 0.3890 |
| 2026 | Argentina | South America | winner | baseline_logistic | 0.3797 |
| 2026 | France | Europe | winner | baseline_logistic | 0.2890 |
| 2026 | Spain | Europe | winner | baseline_logistic | 0.2113 |
| 2026 | England | Europe | winner | baseline_logistic | 0.1276 |
| 2026 | Netherlands | Europe | winner | baseline_logistic | 0.0895 |

**Supplementary Figure S1**

**Cross-Validation Curves for Penalized Logistic Regression Models**


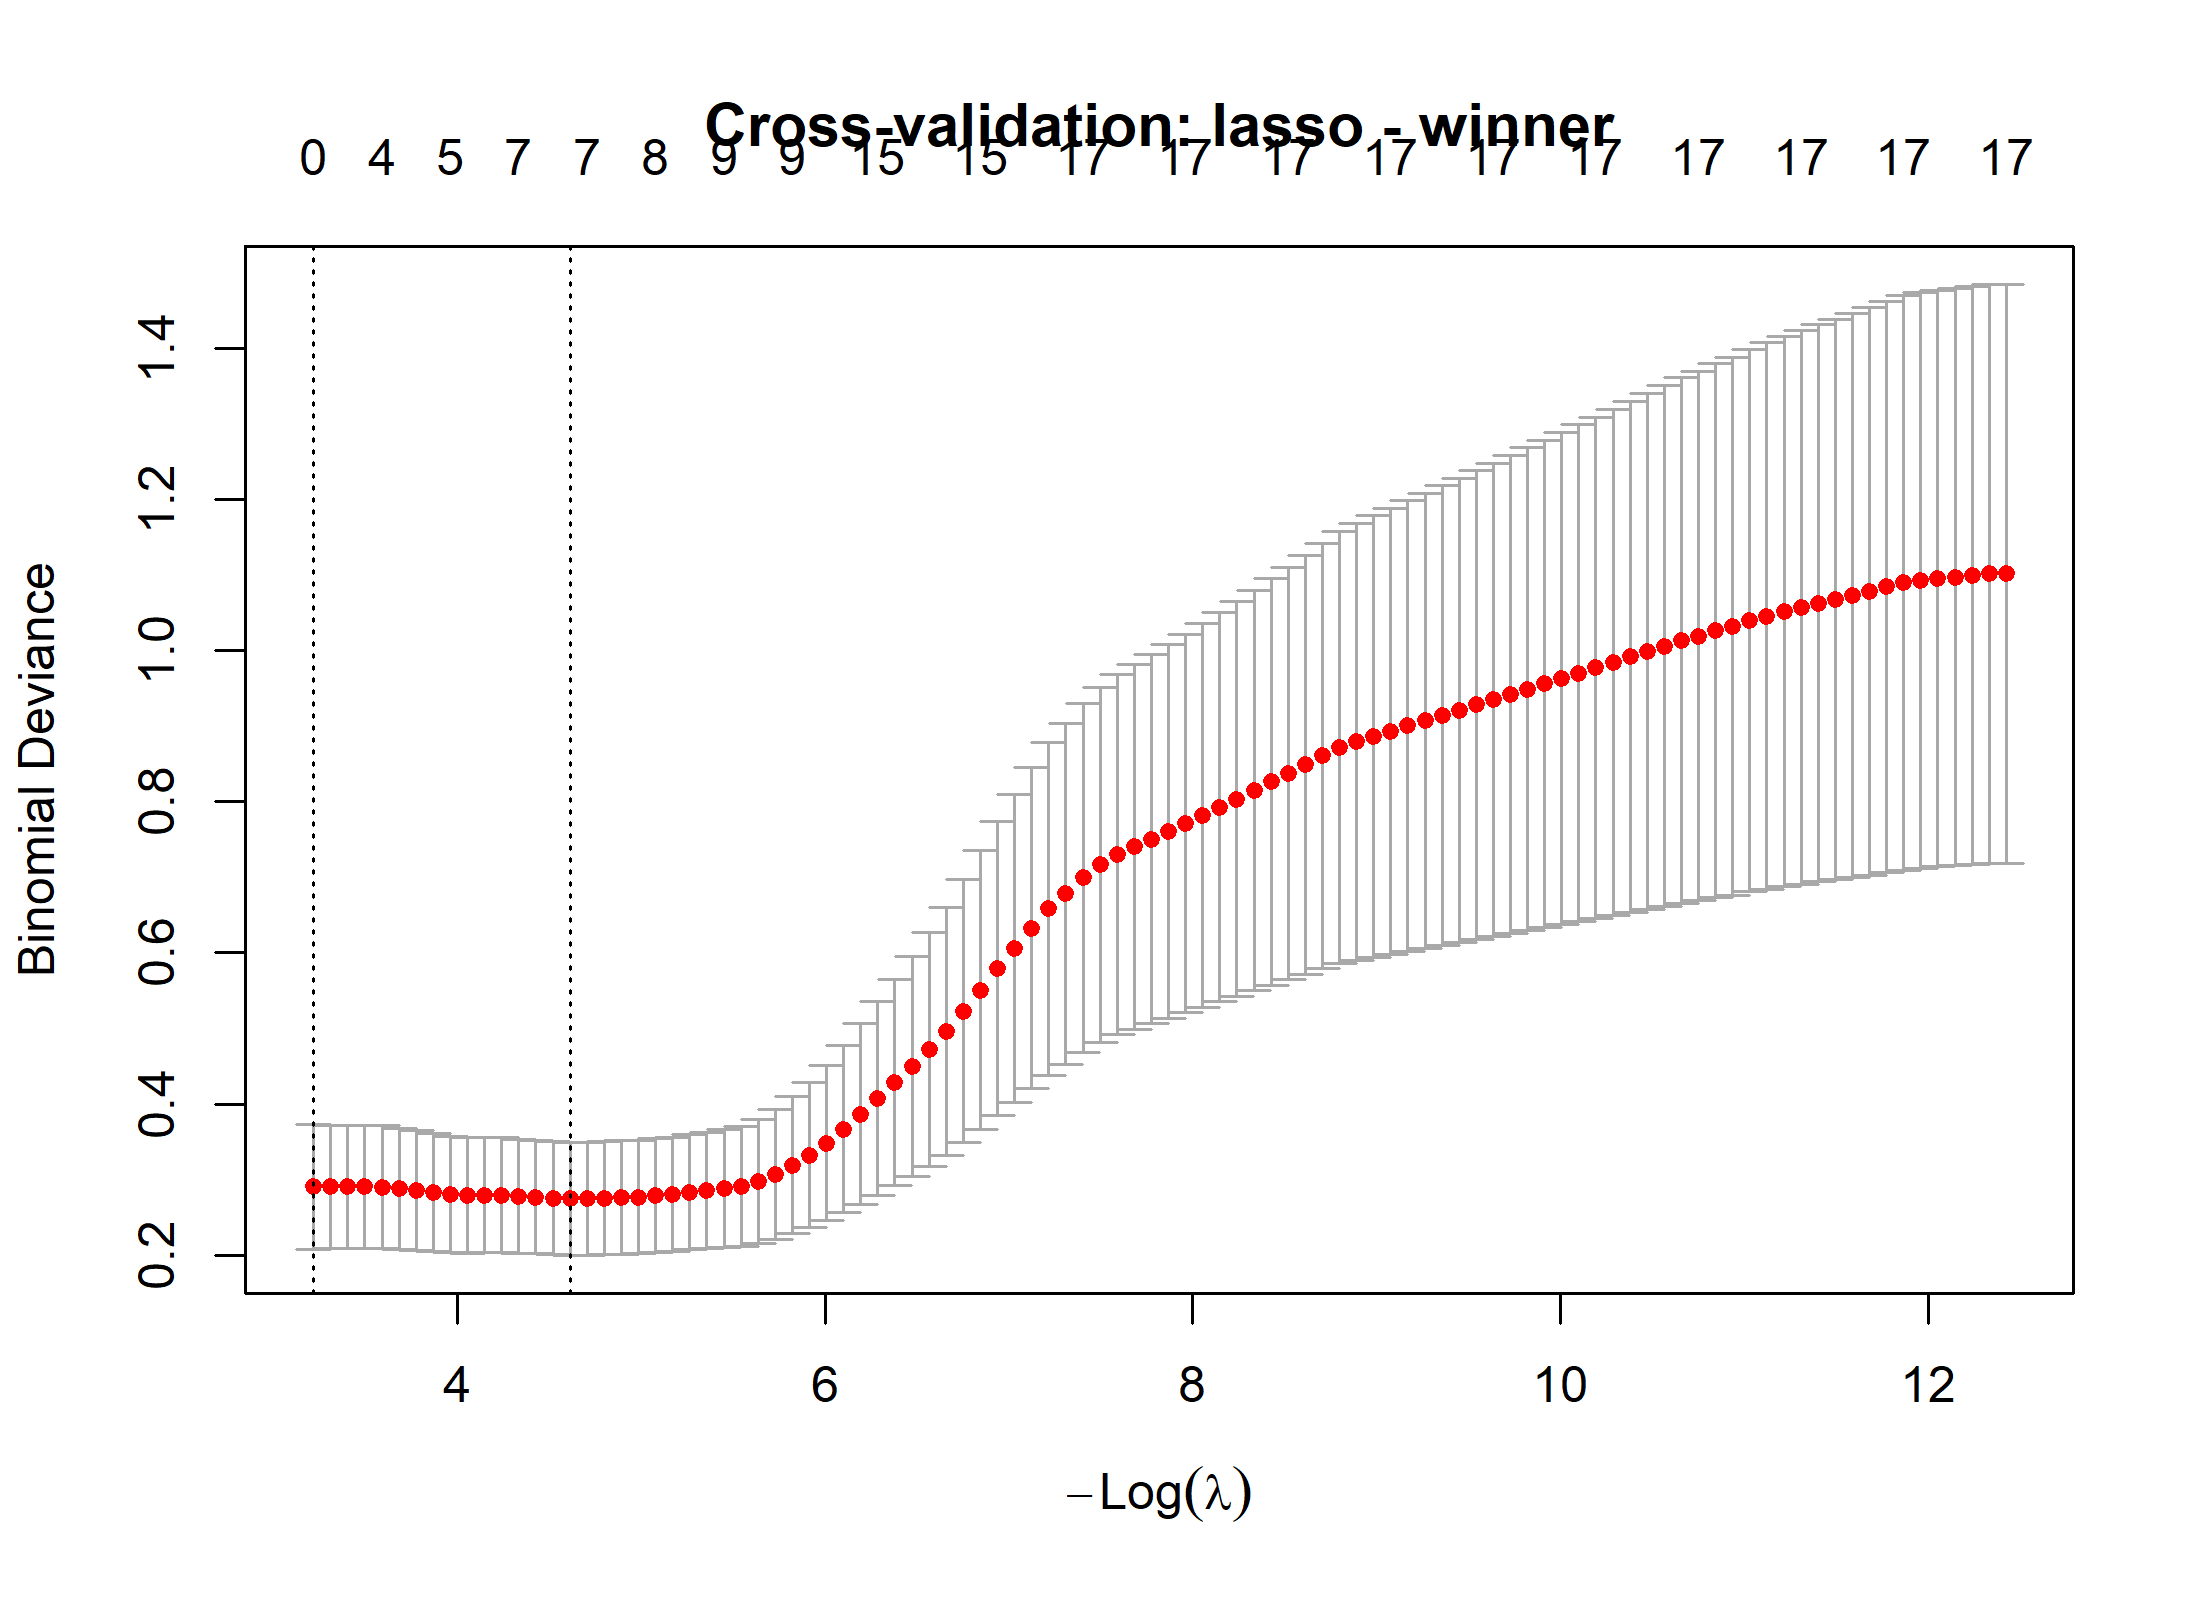

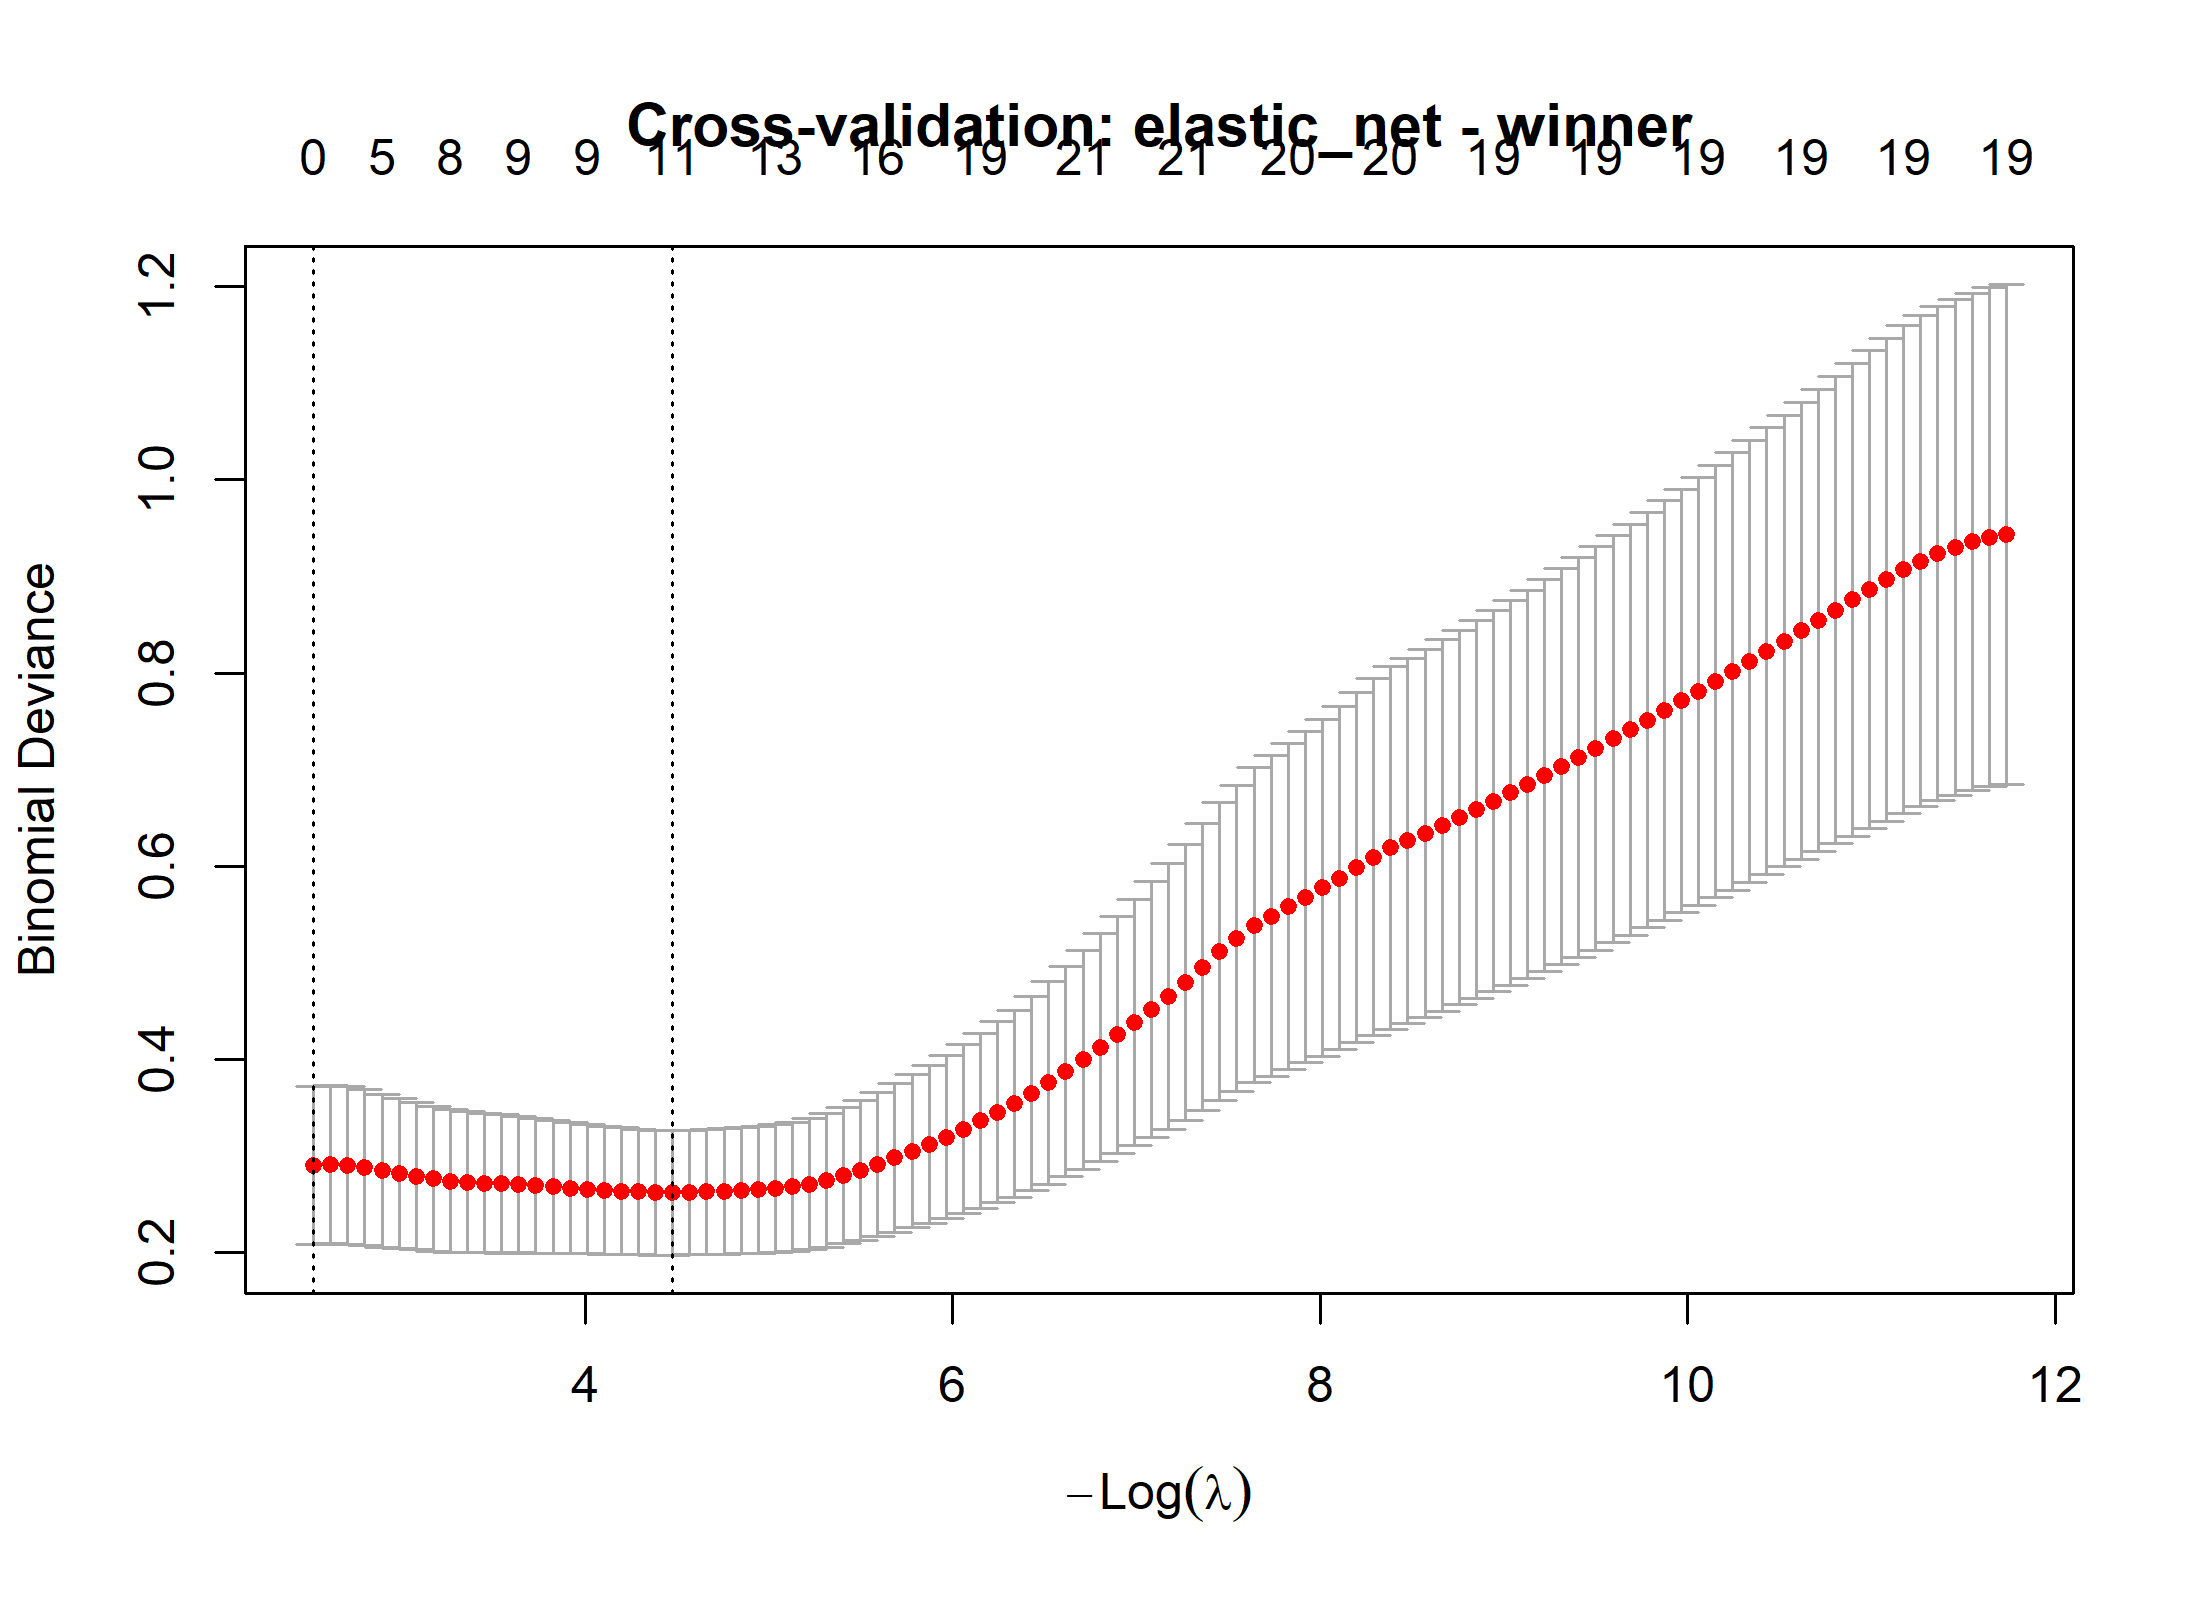

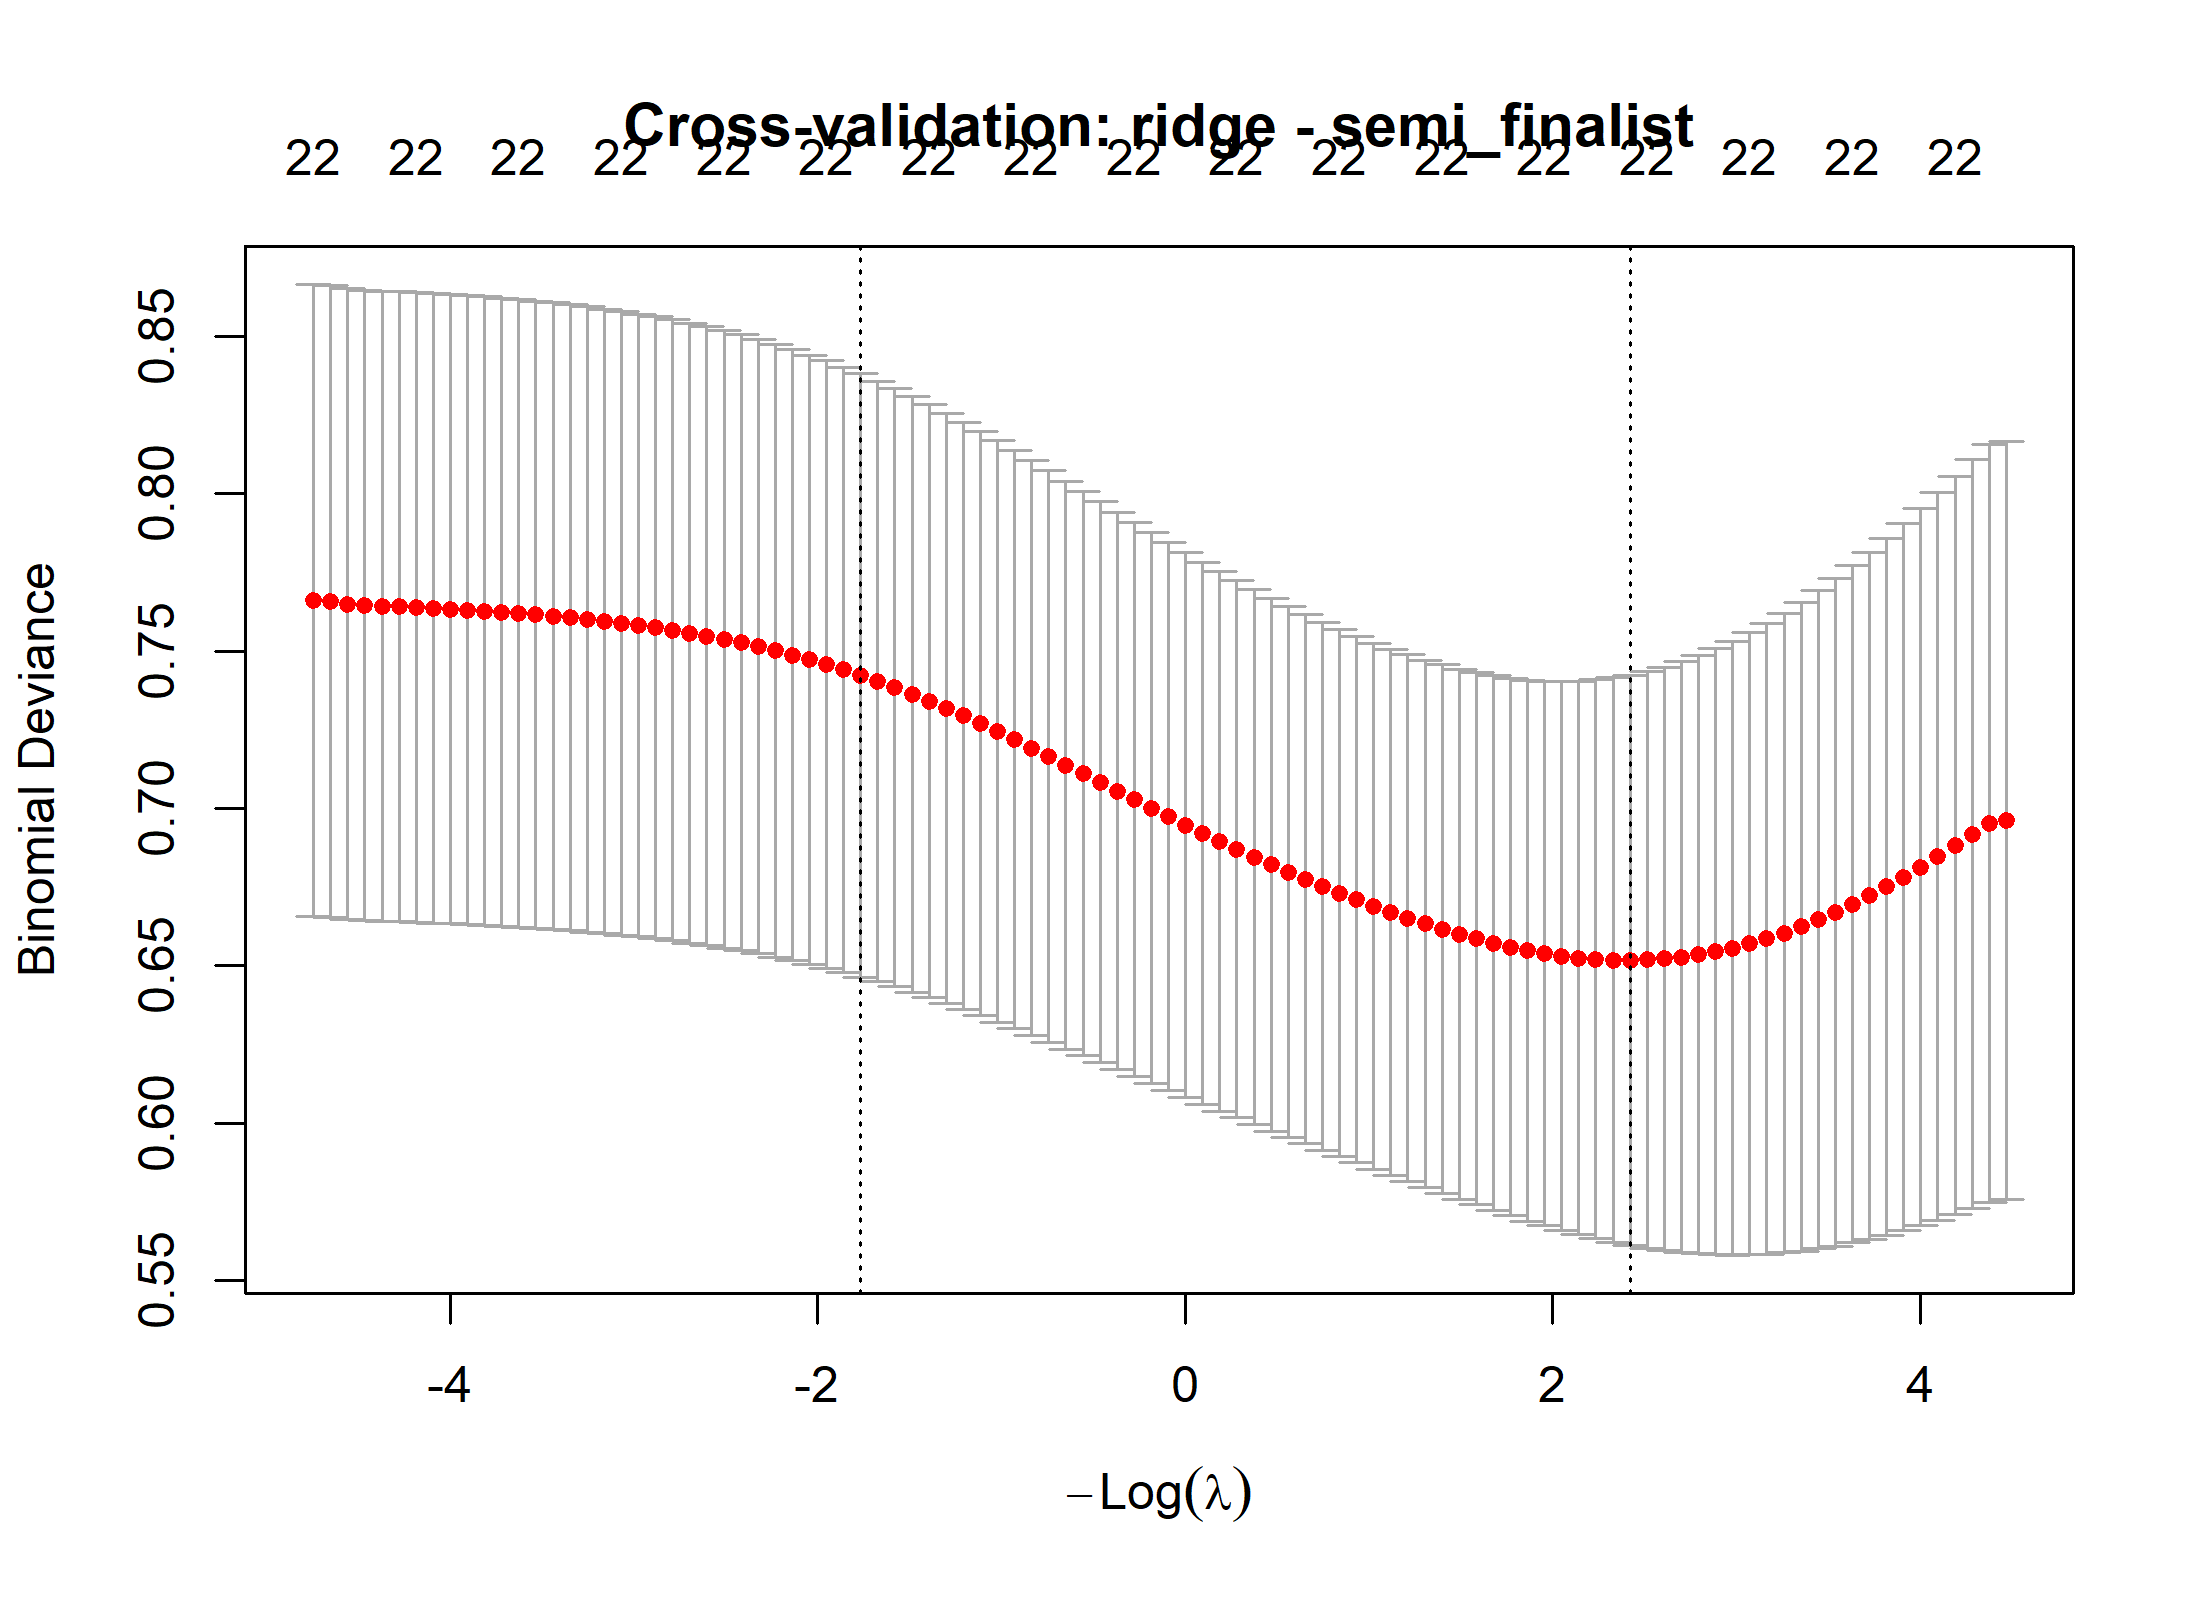

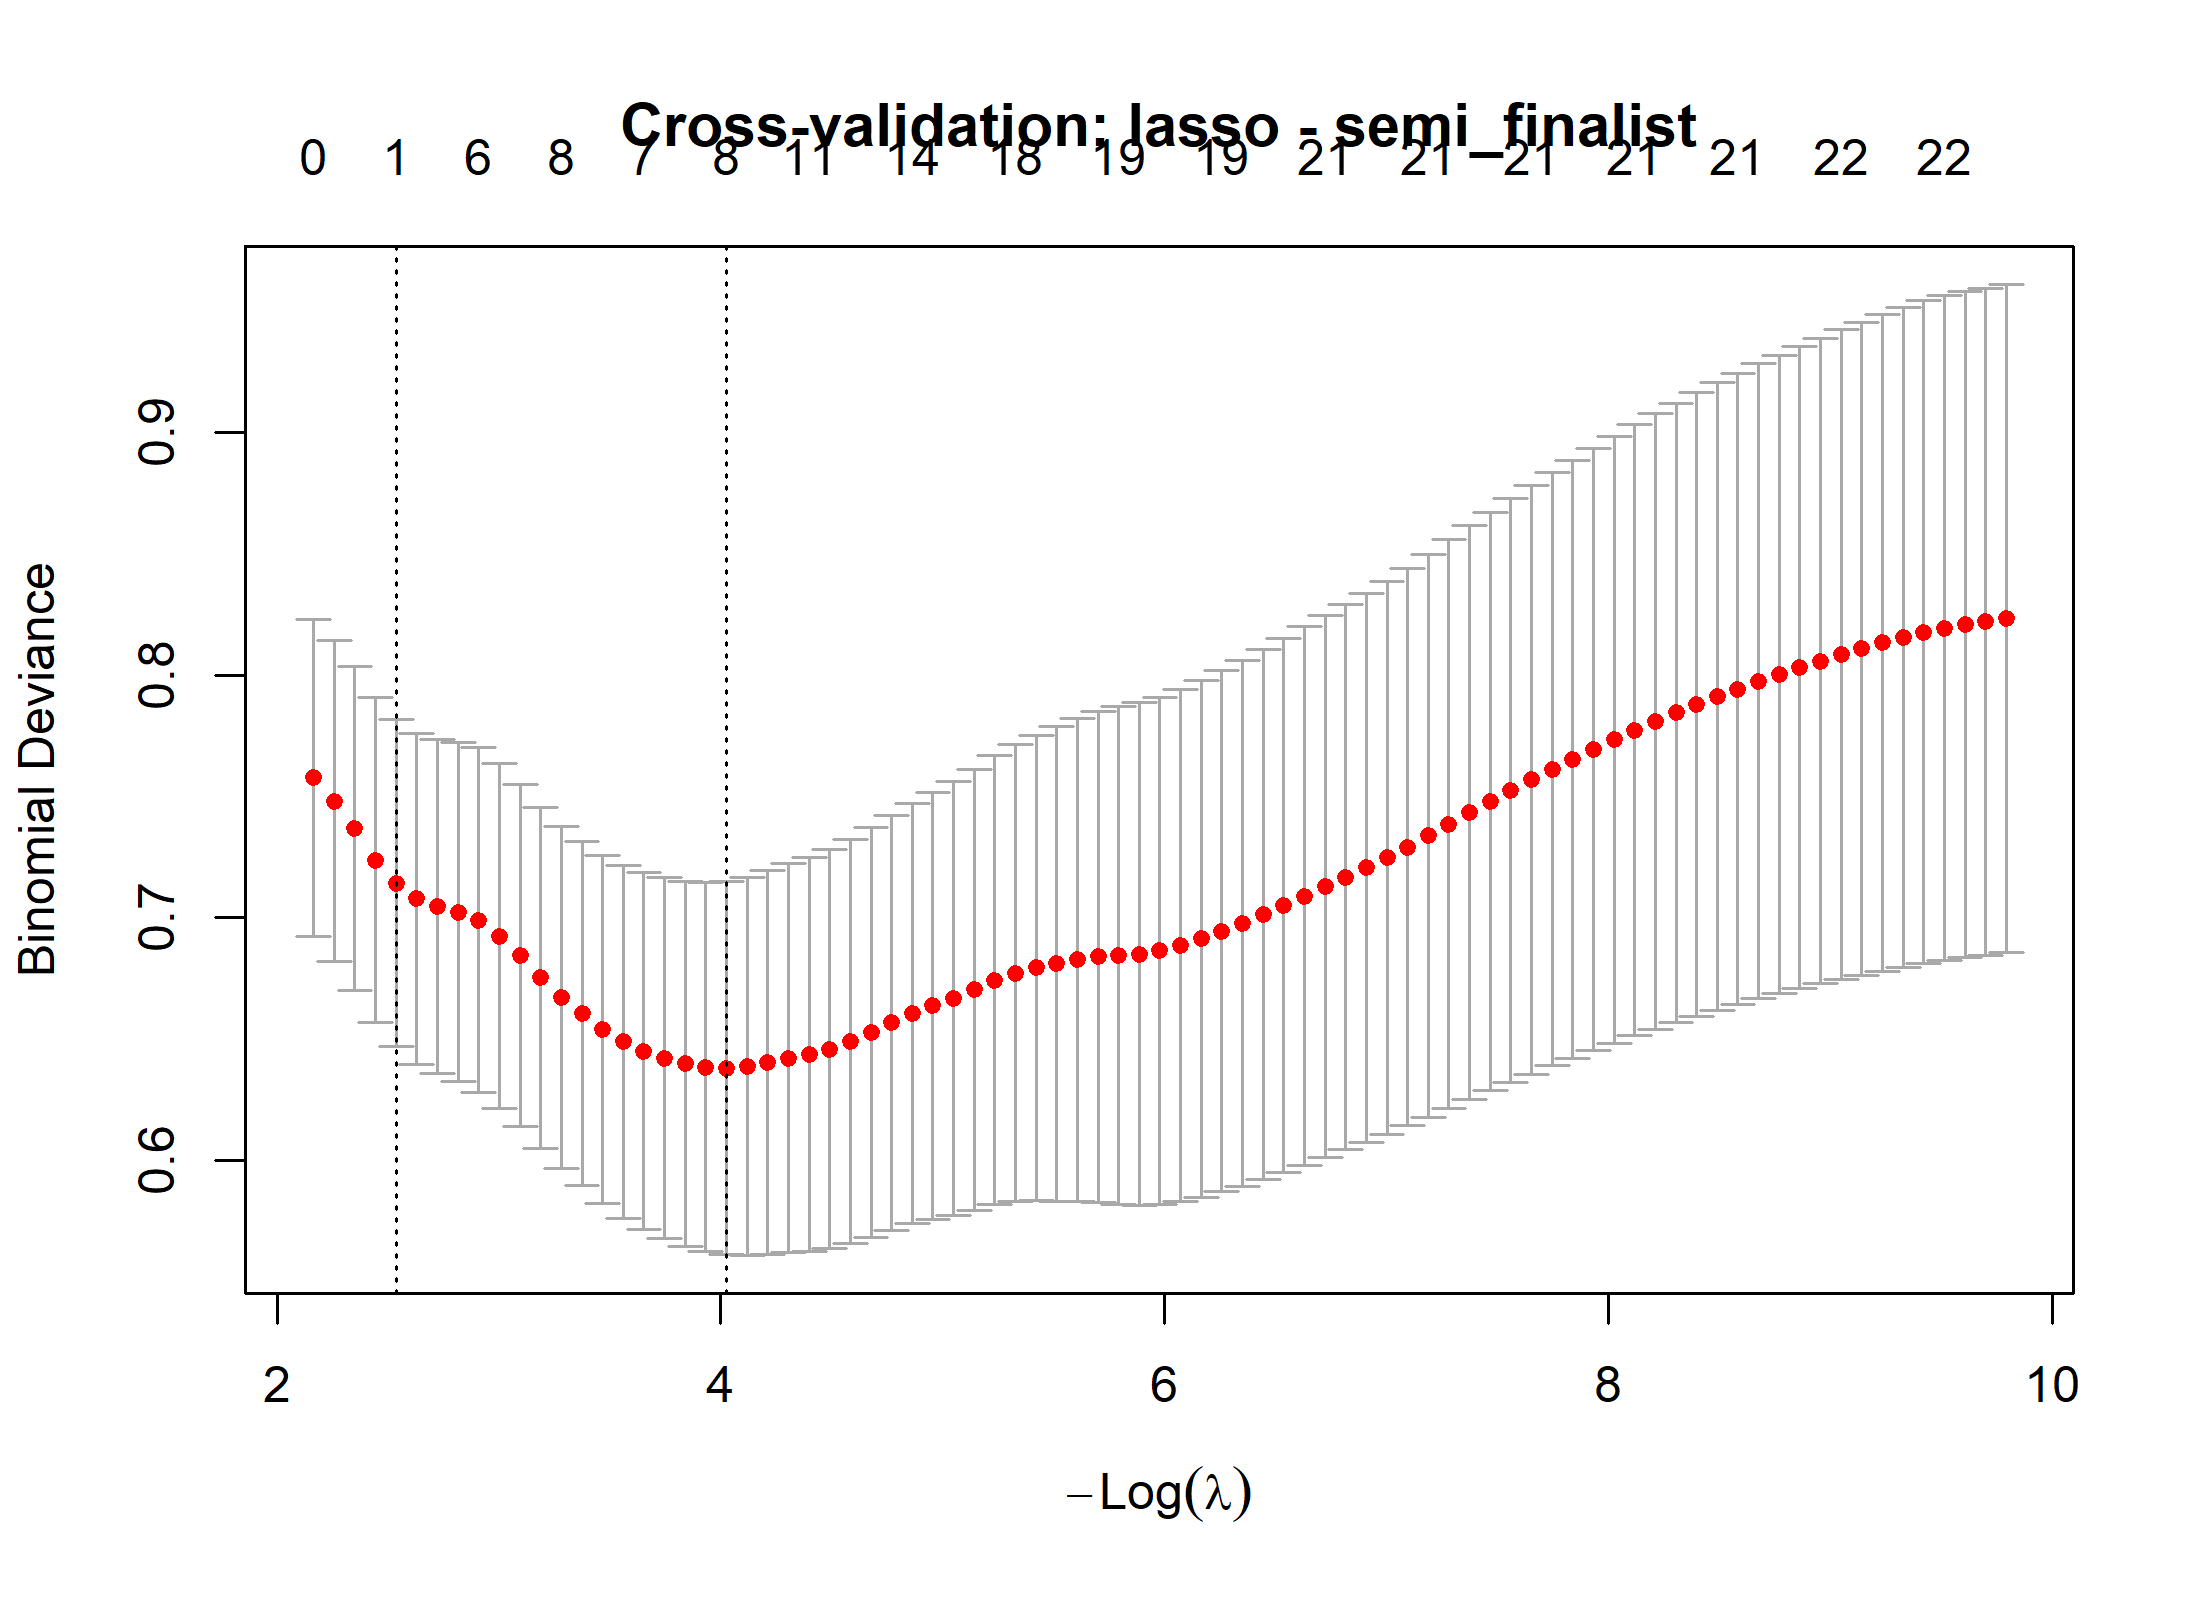

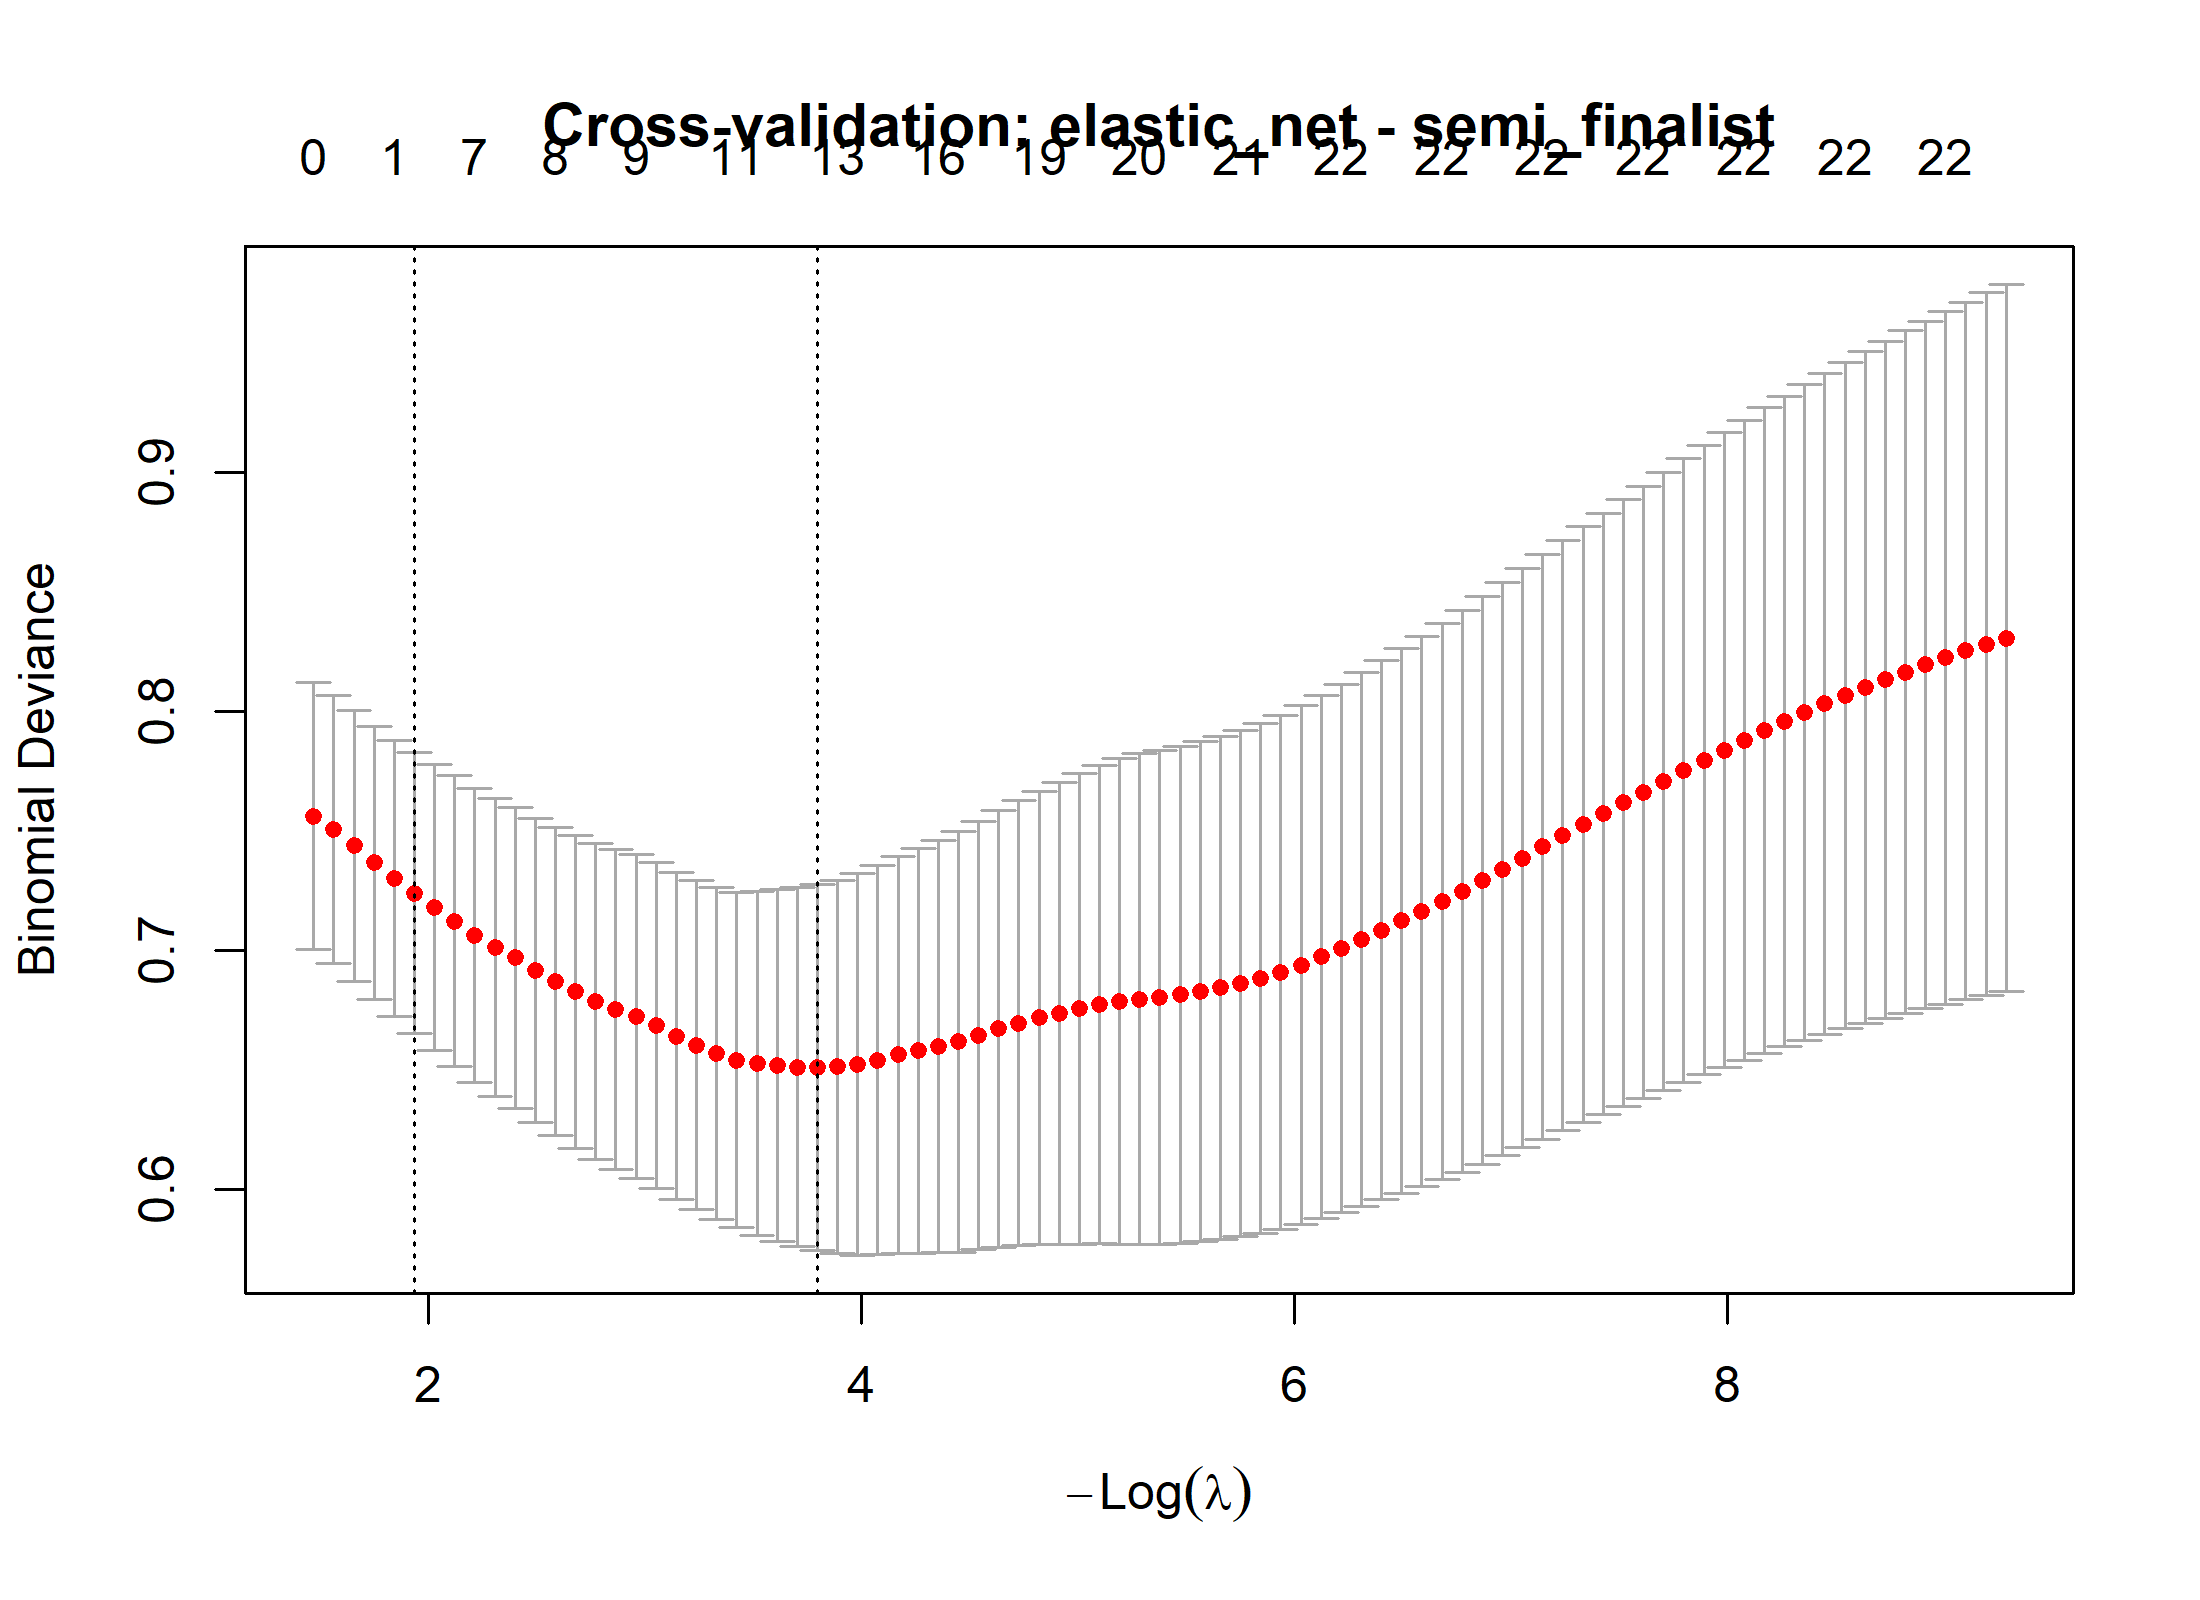

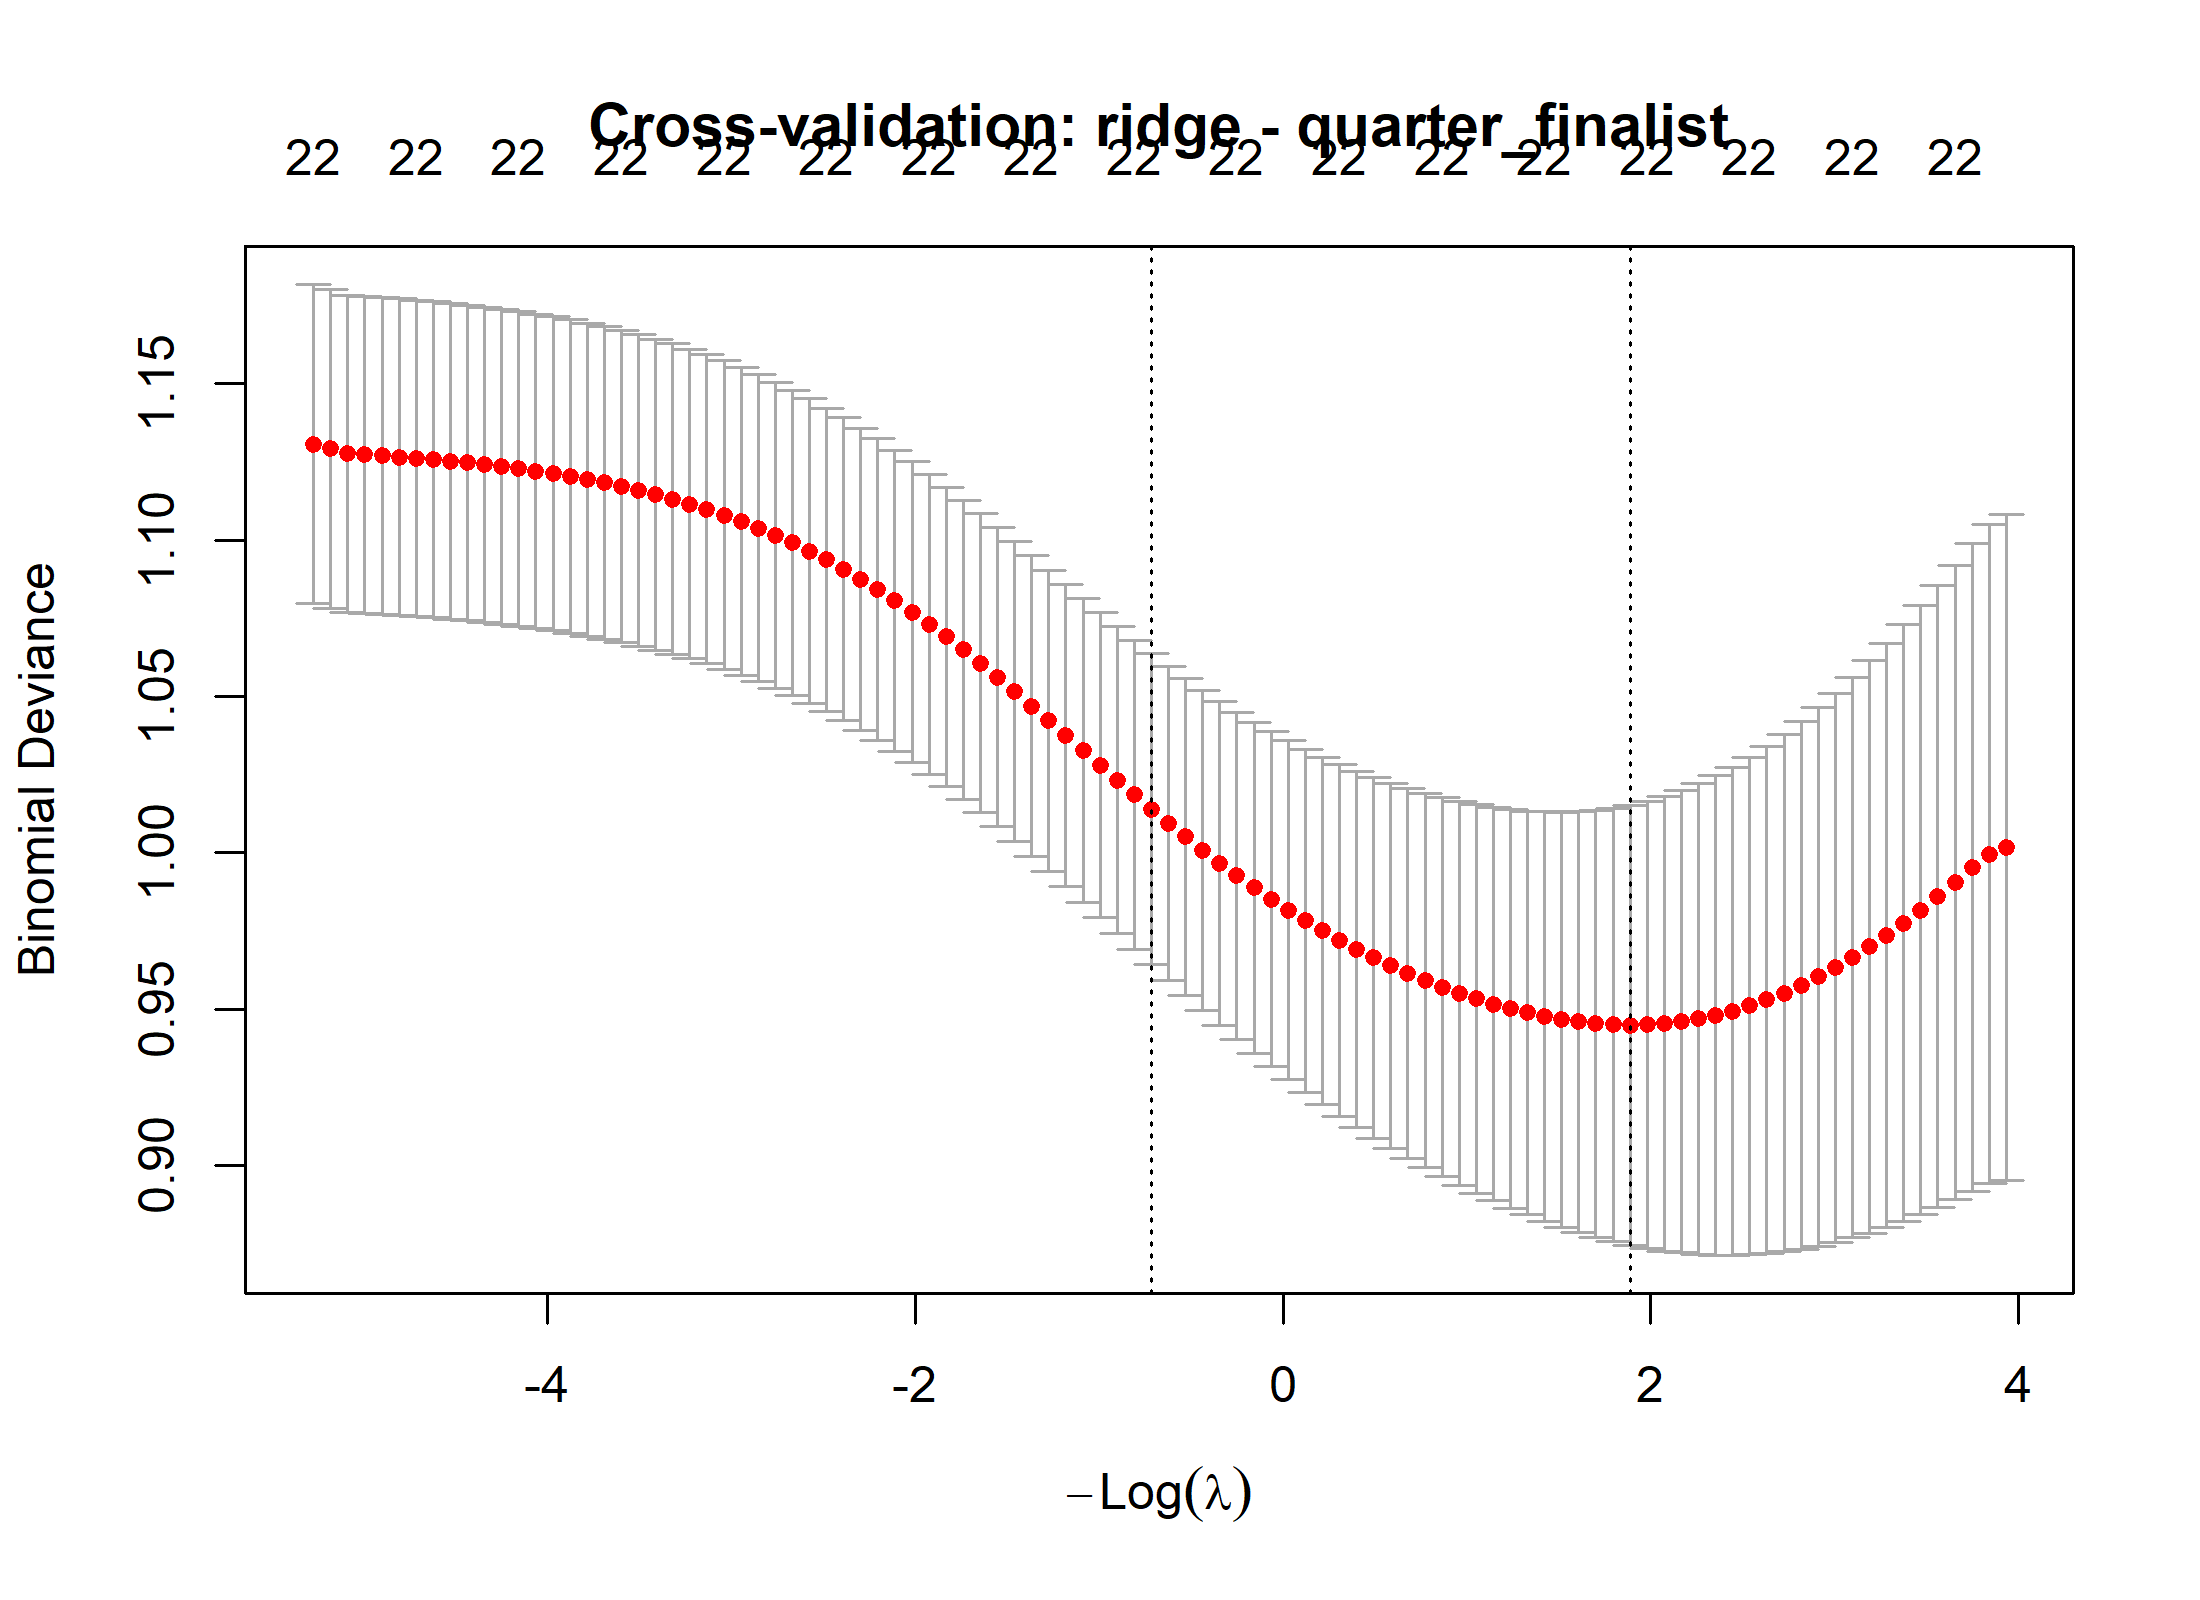

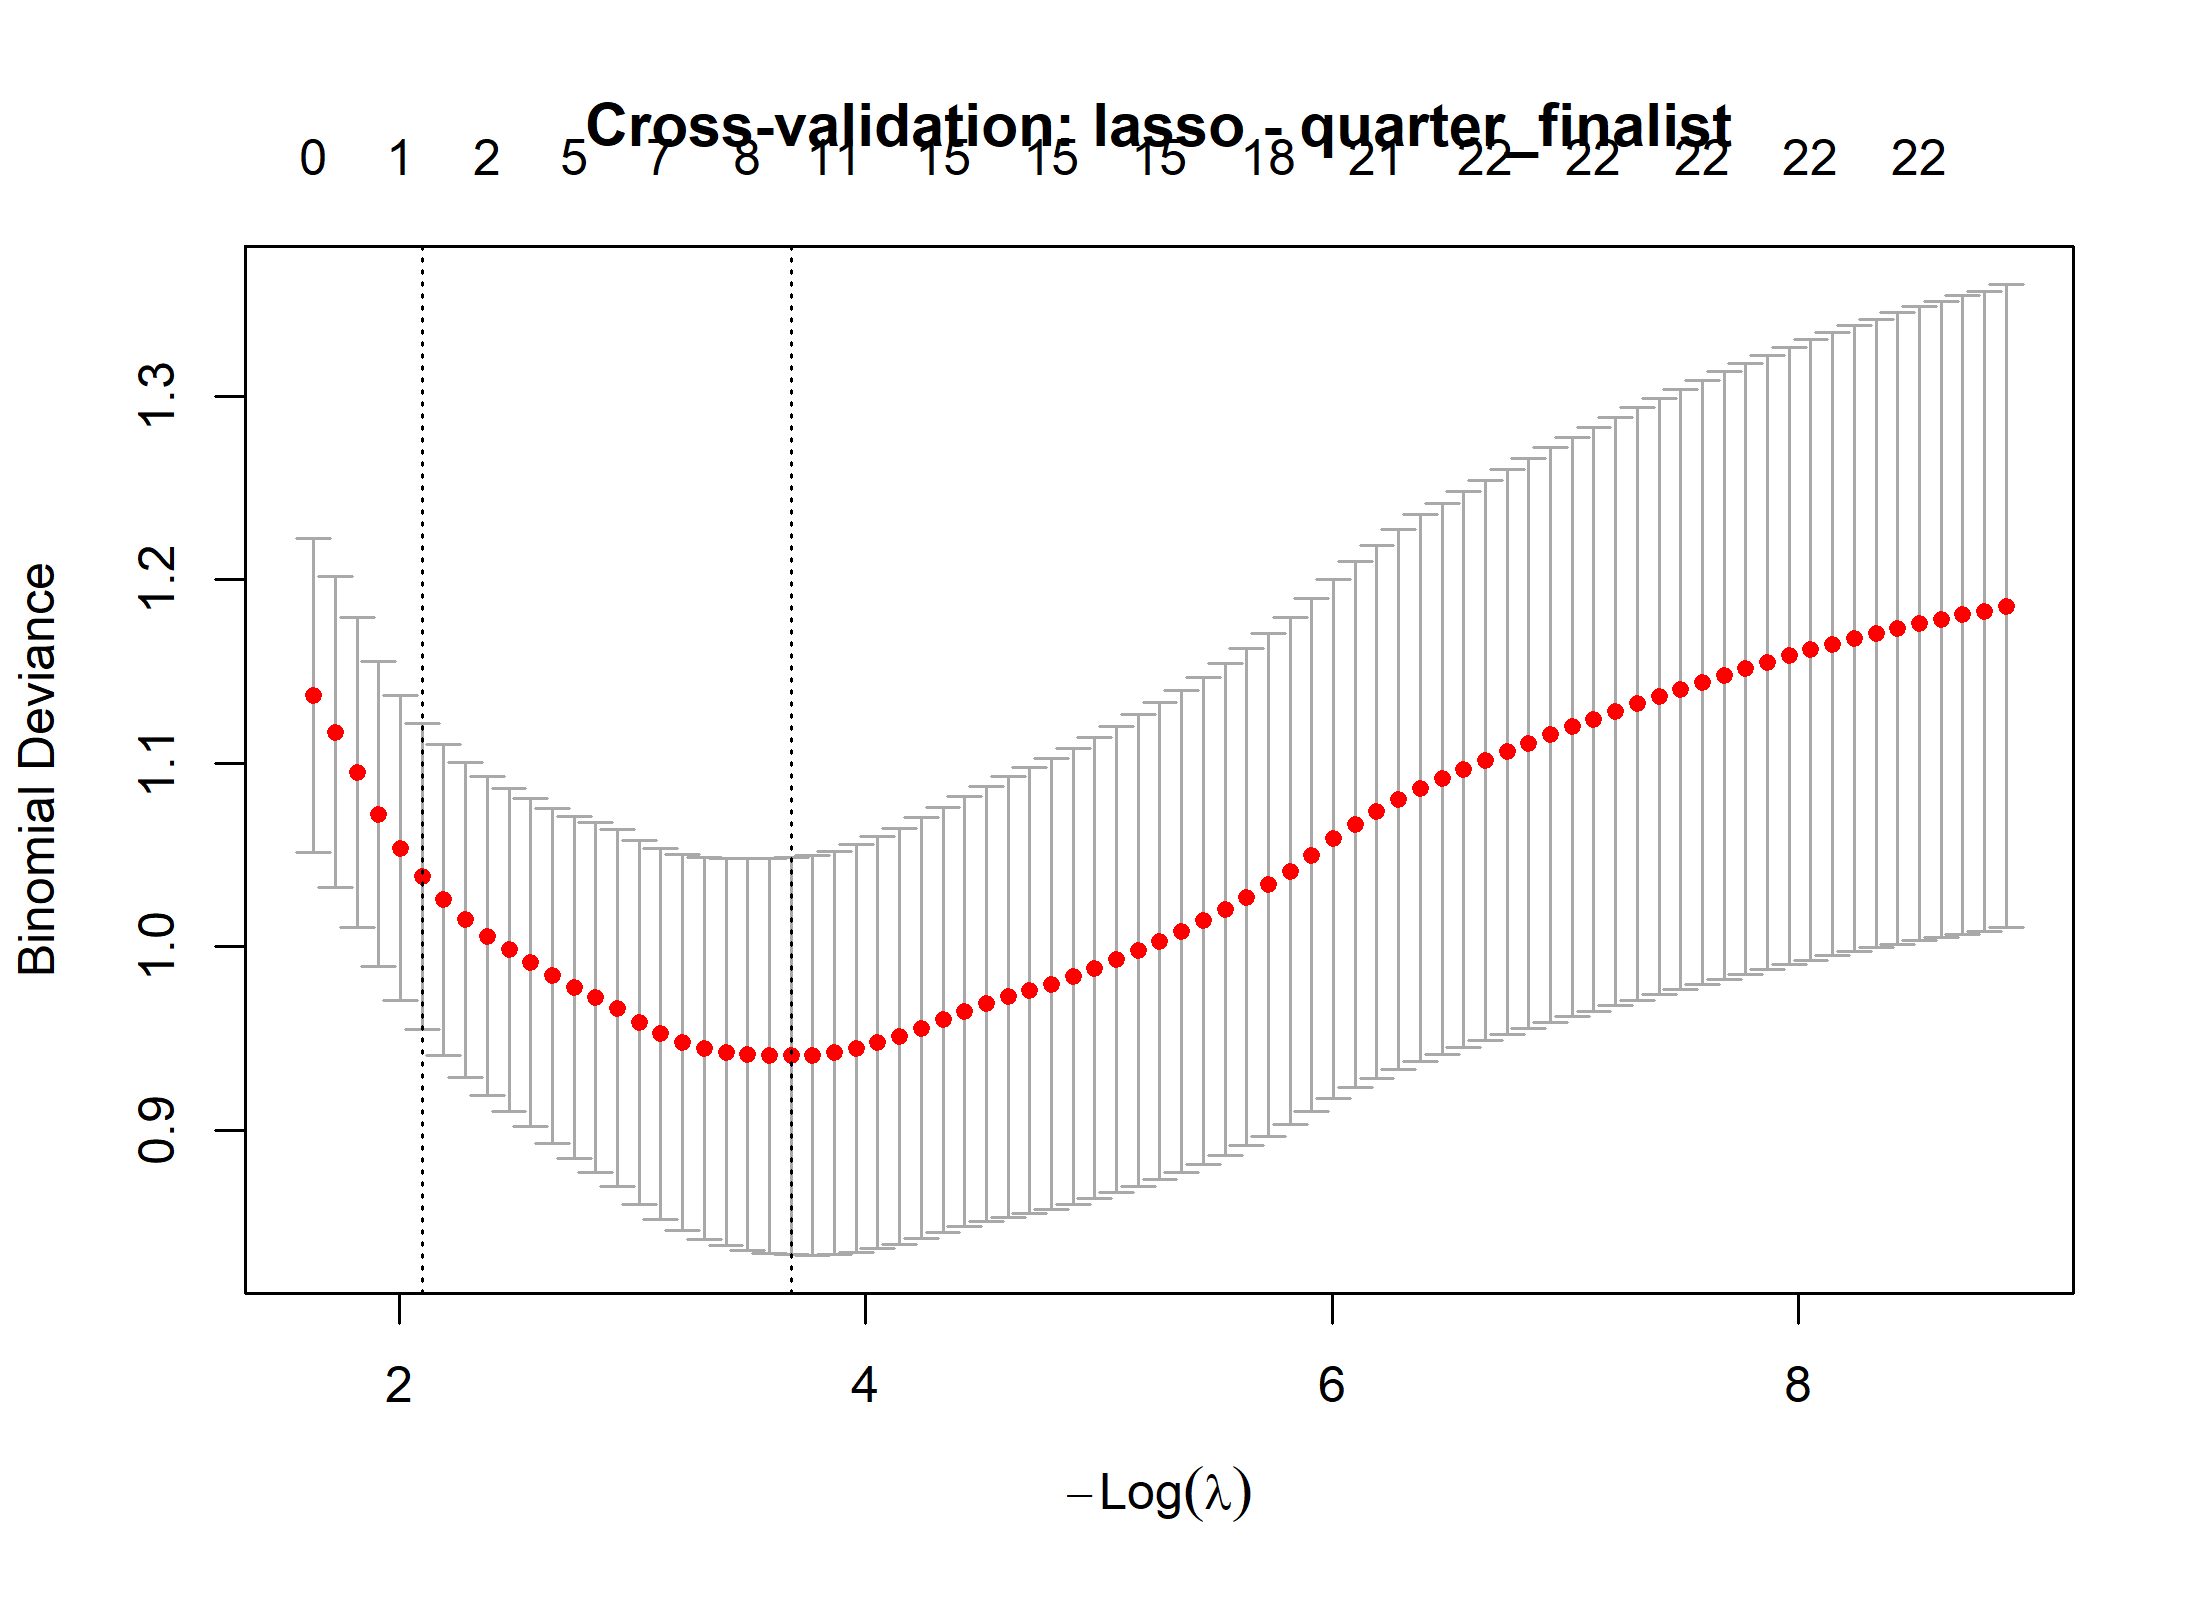

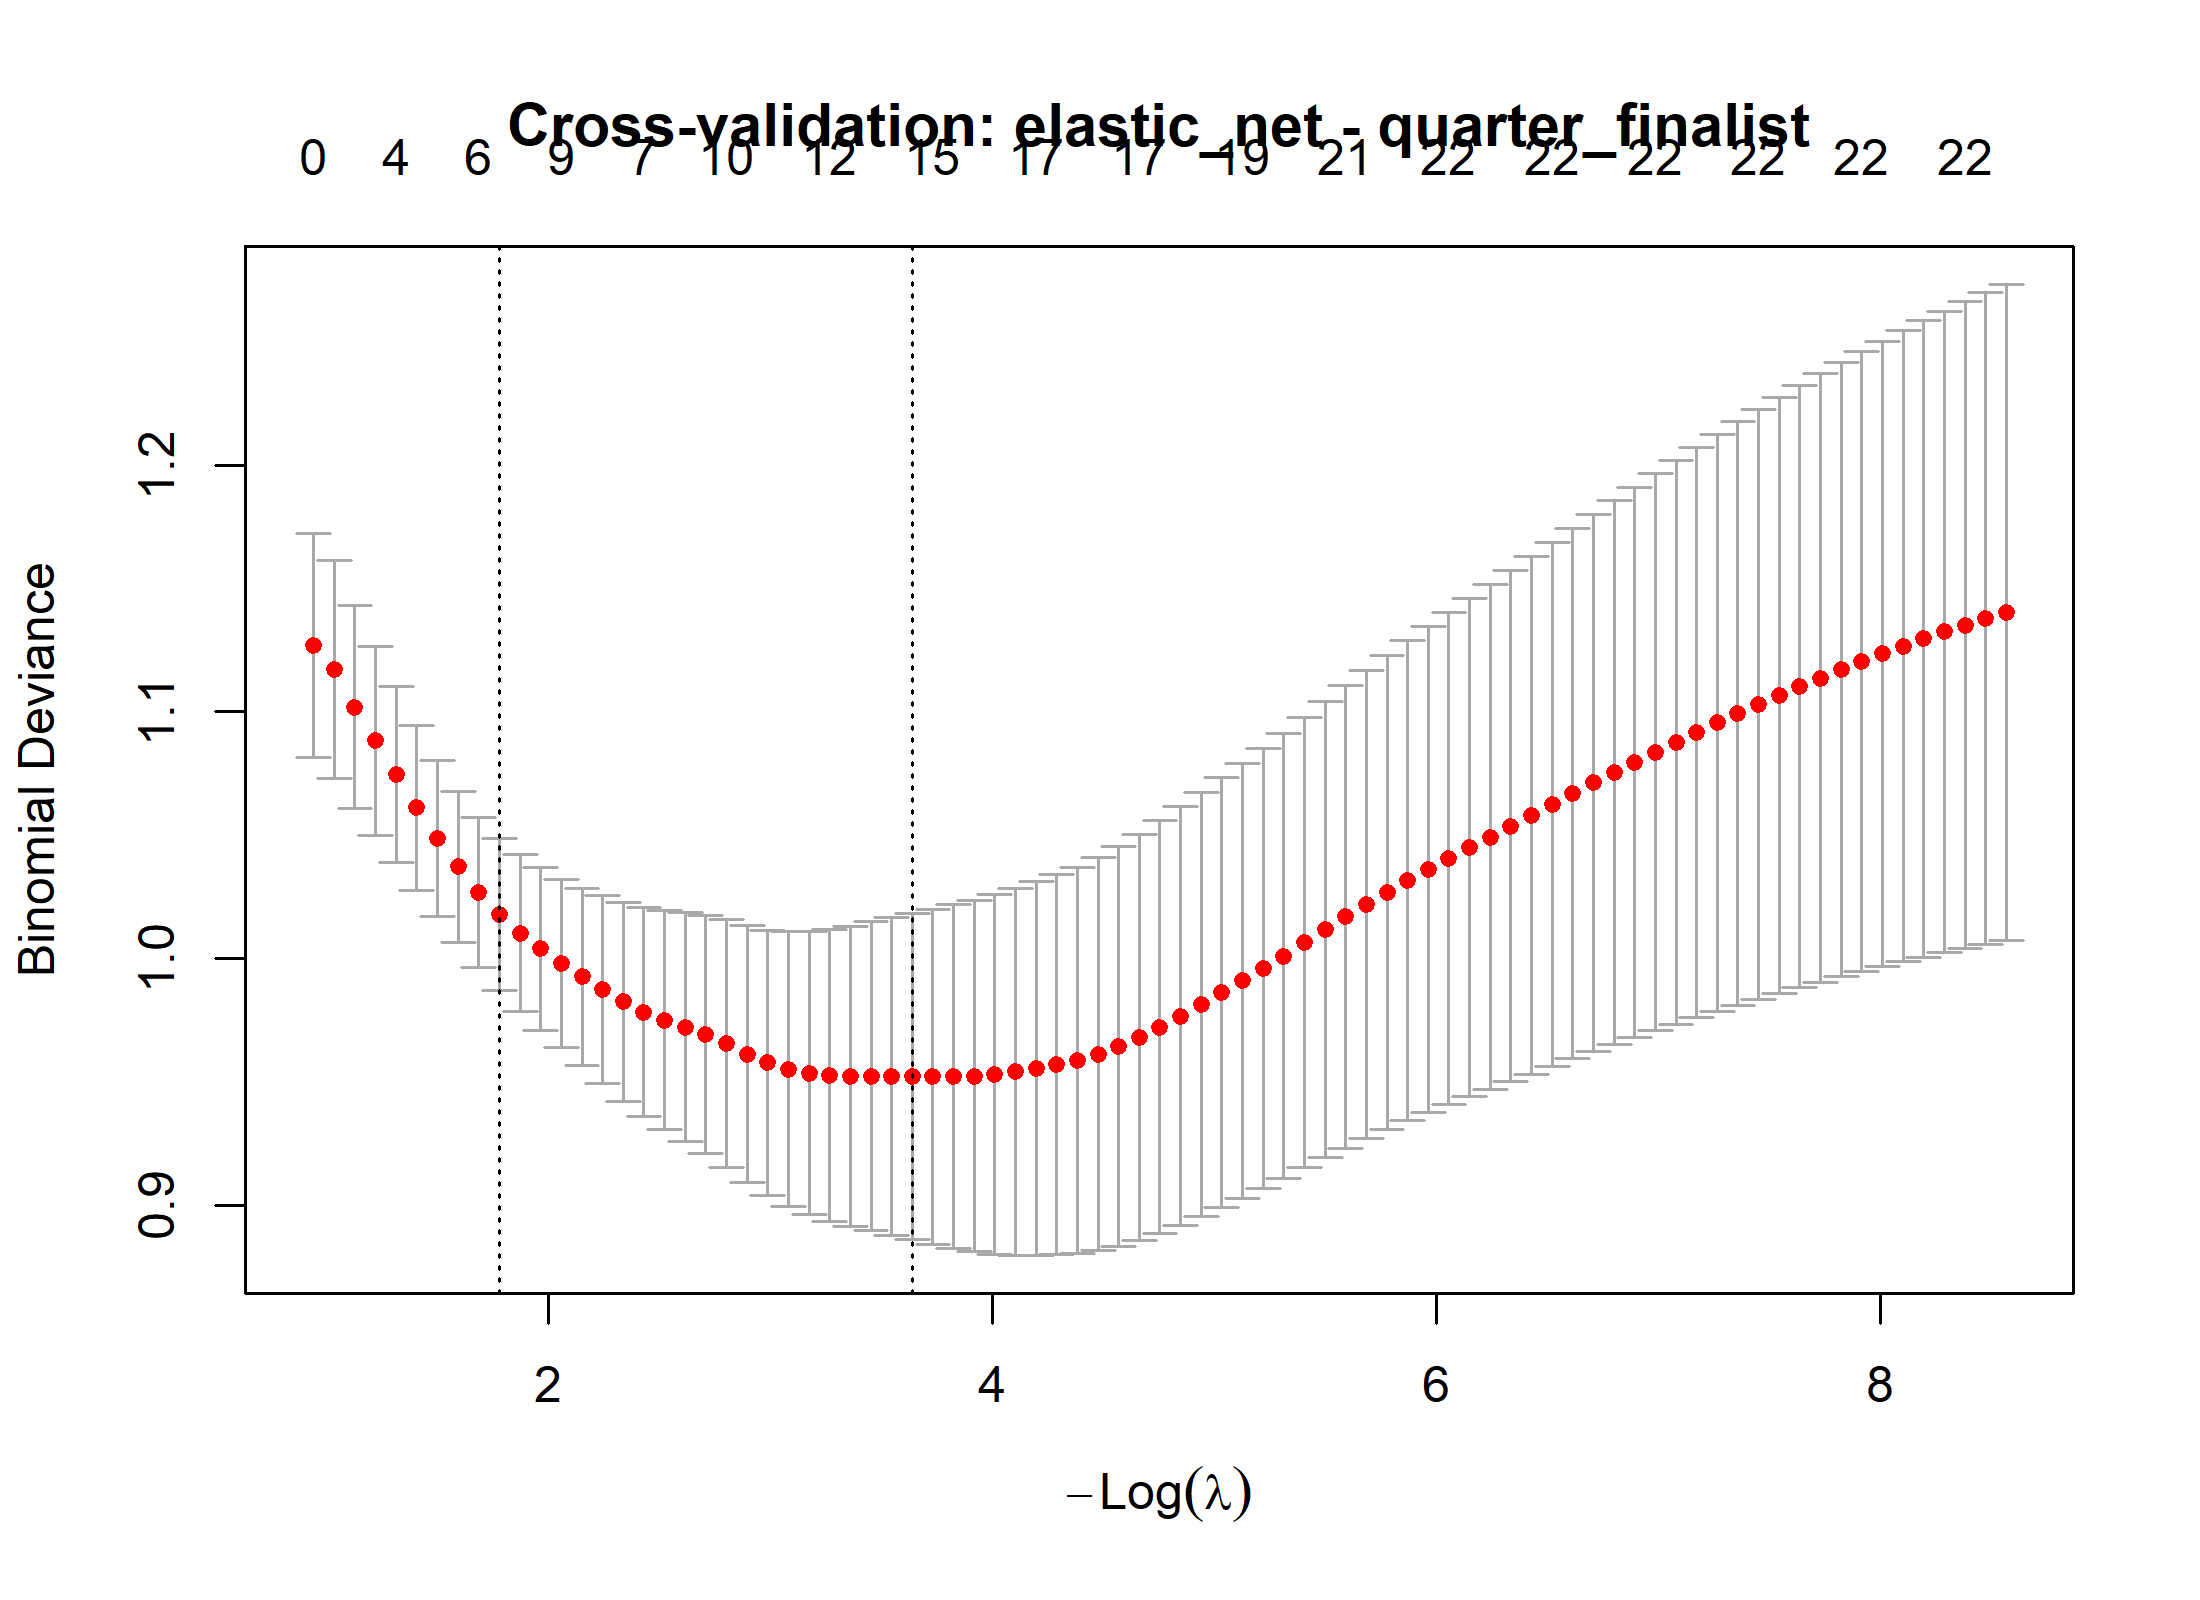

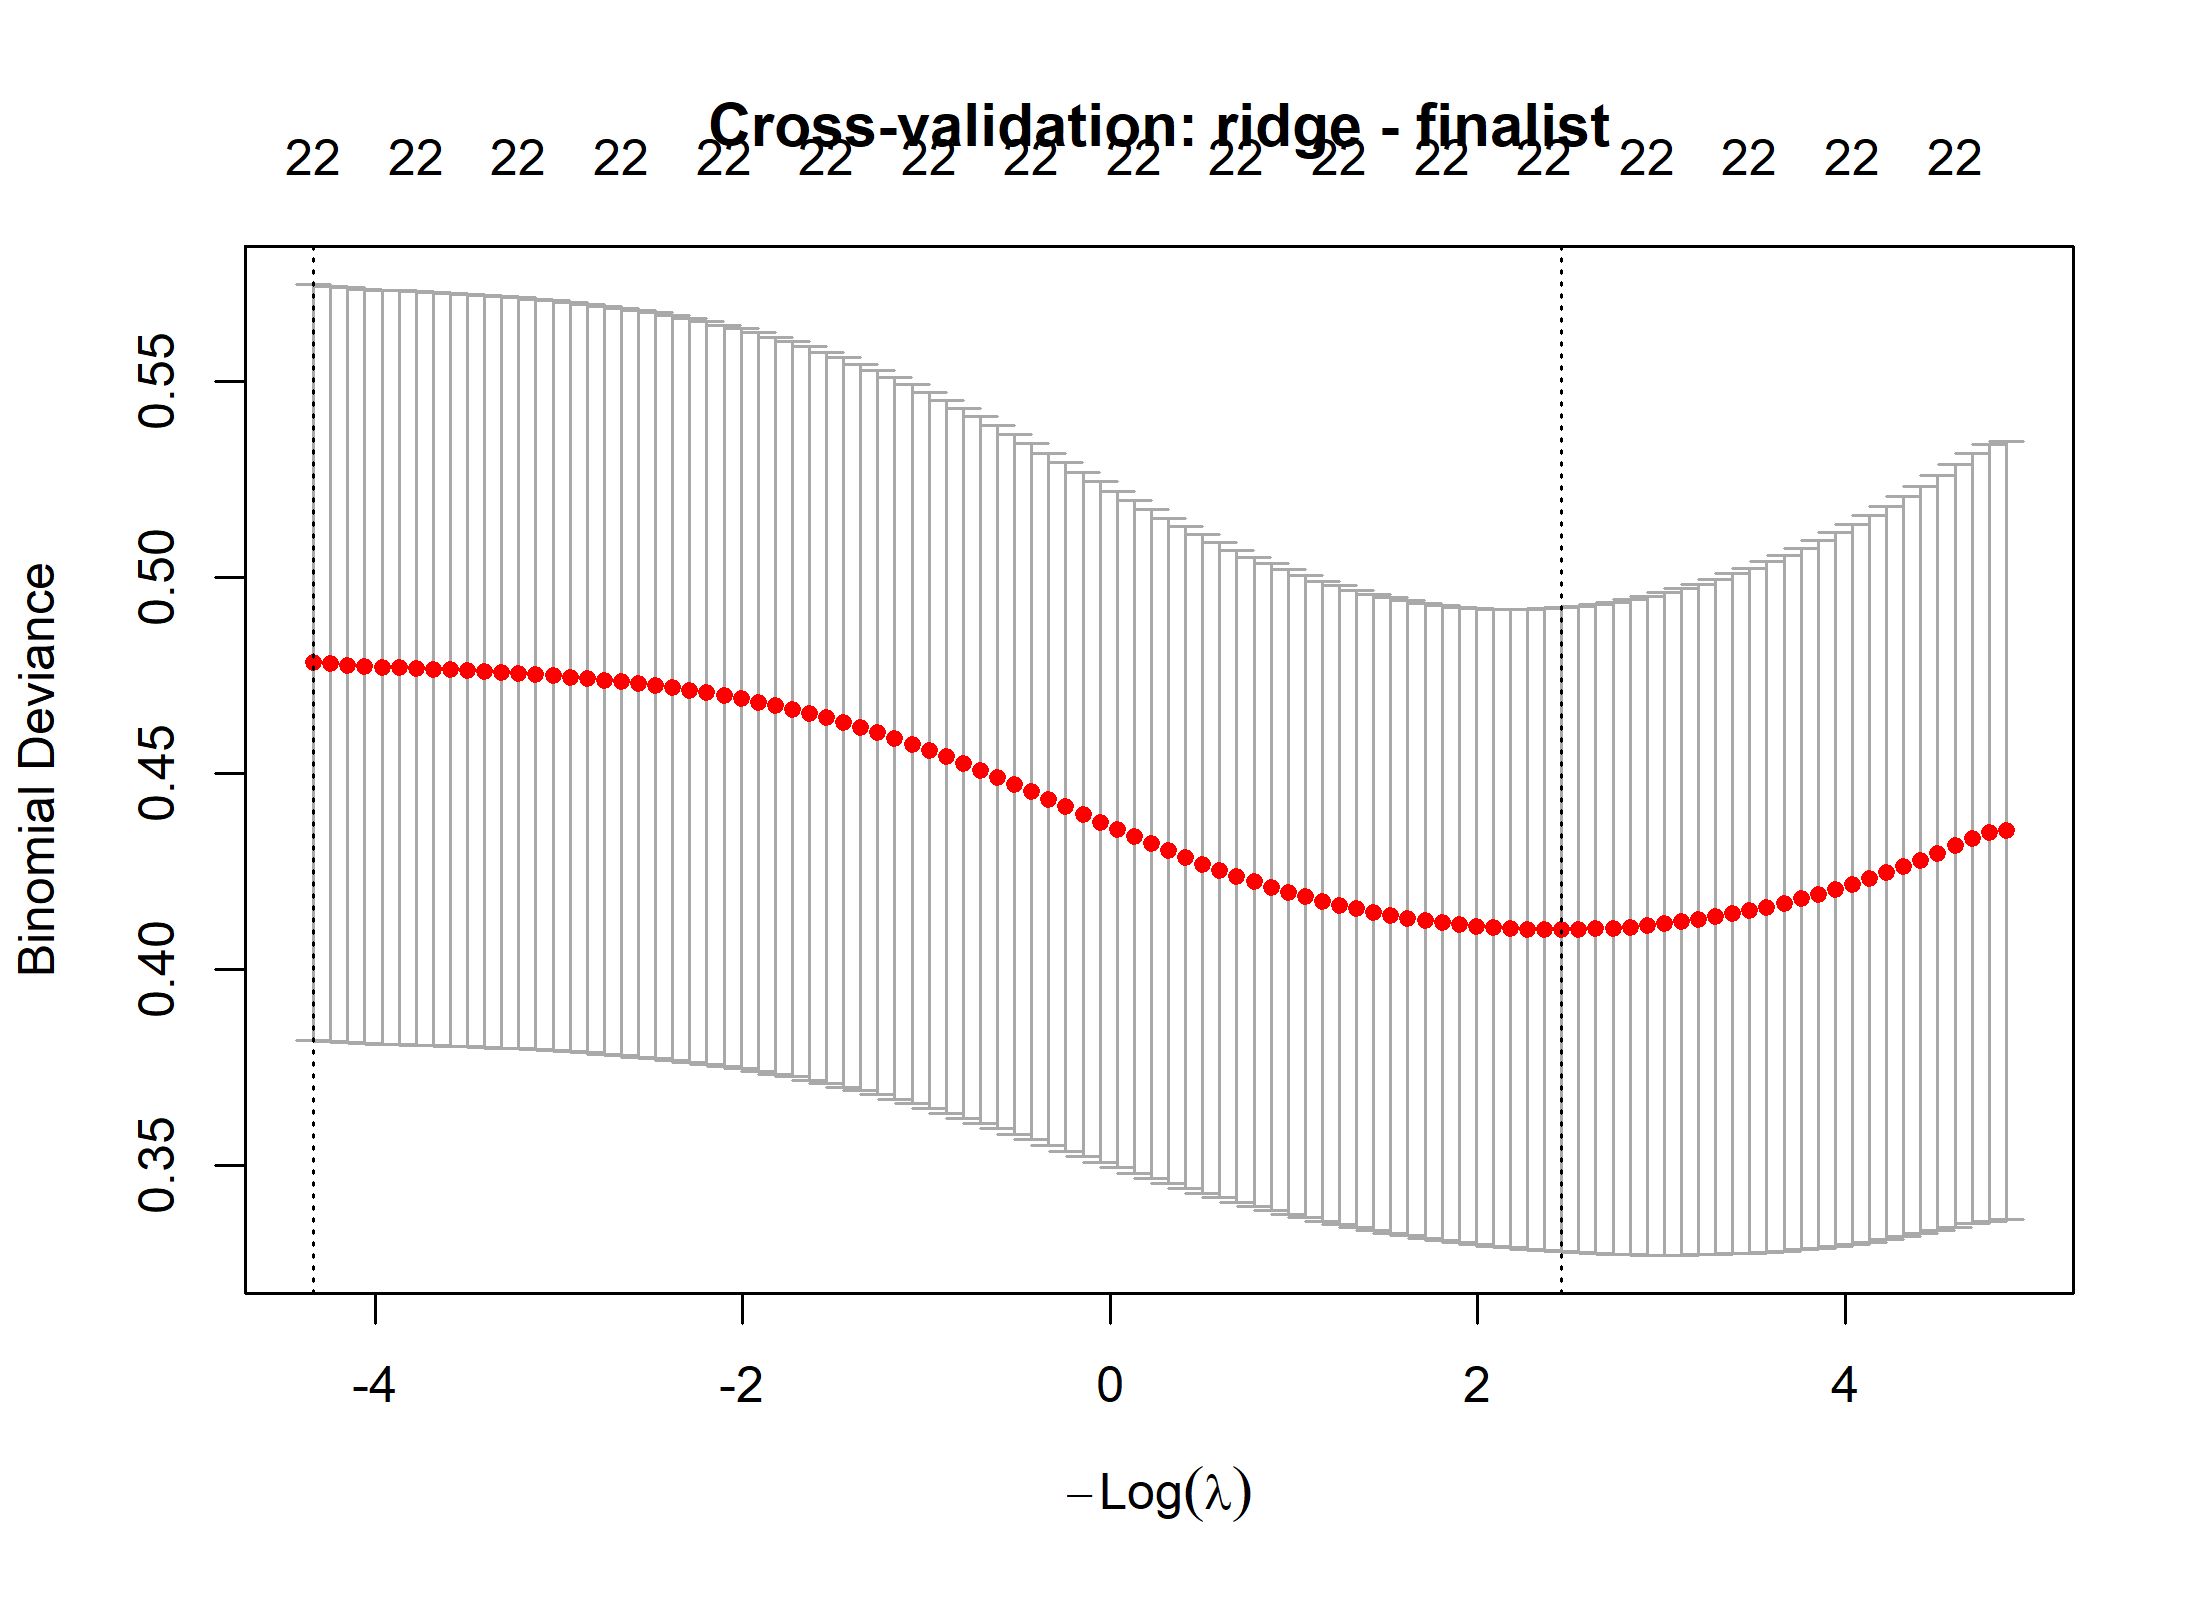

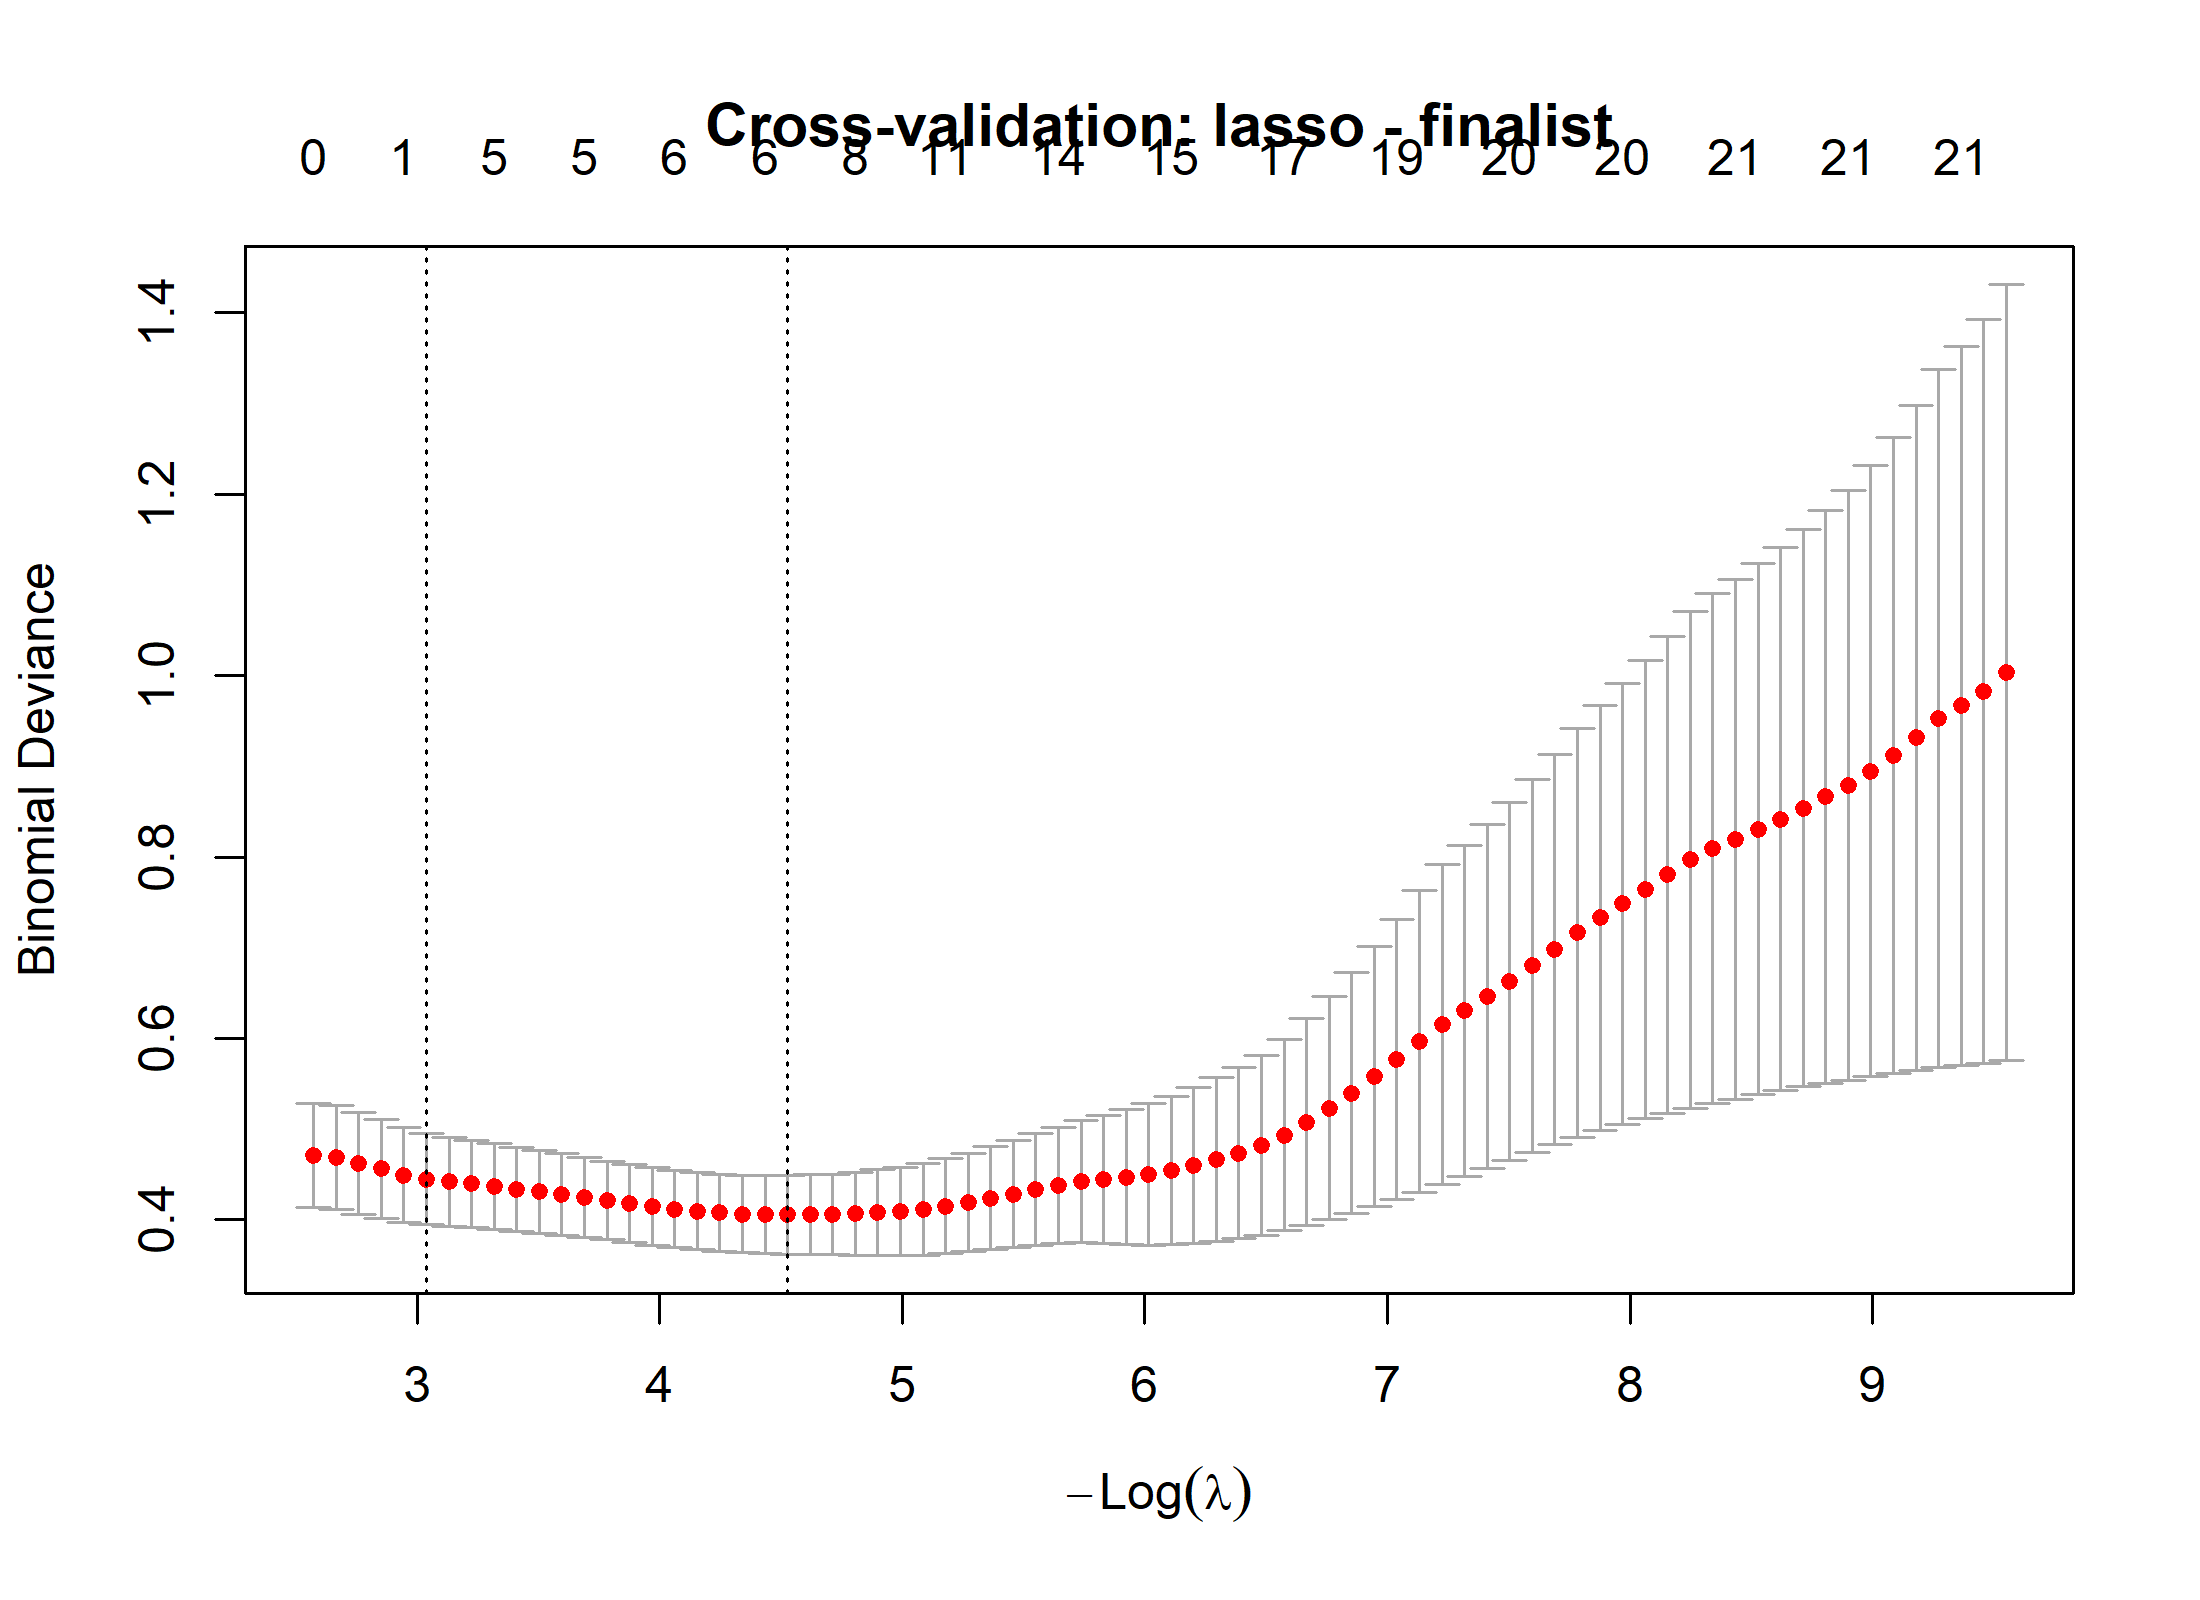

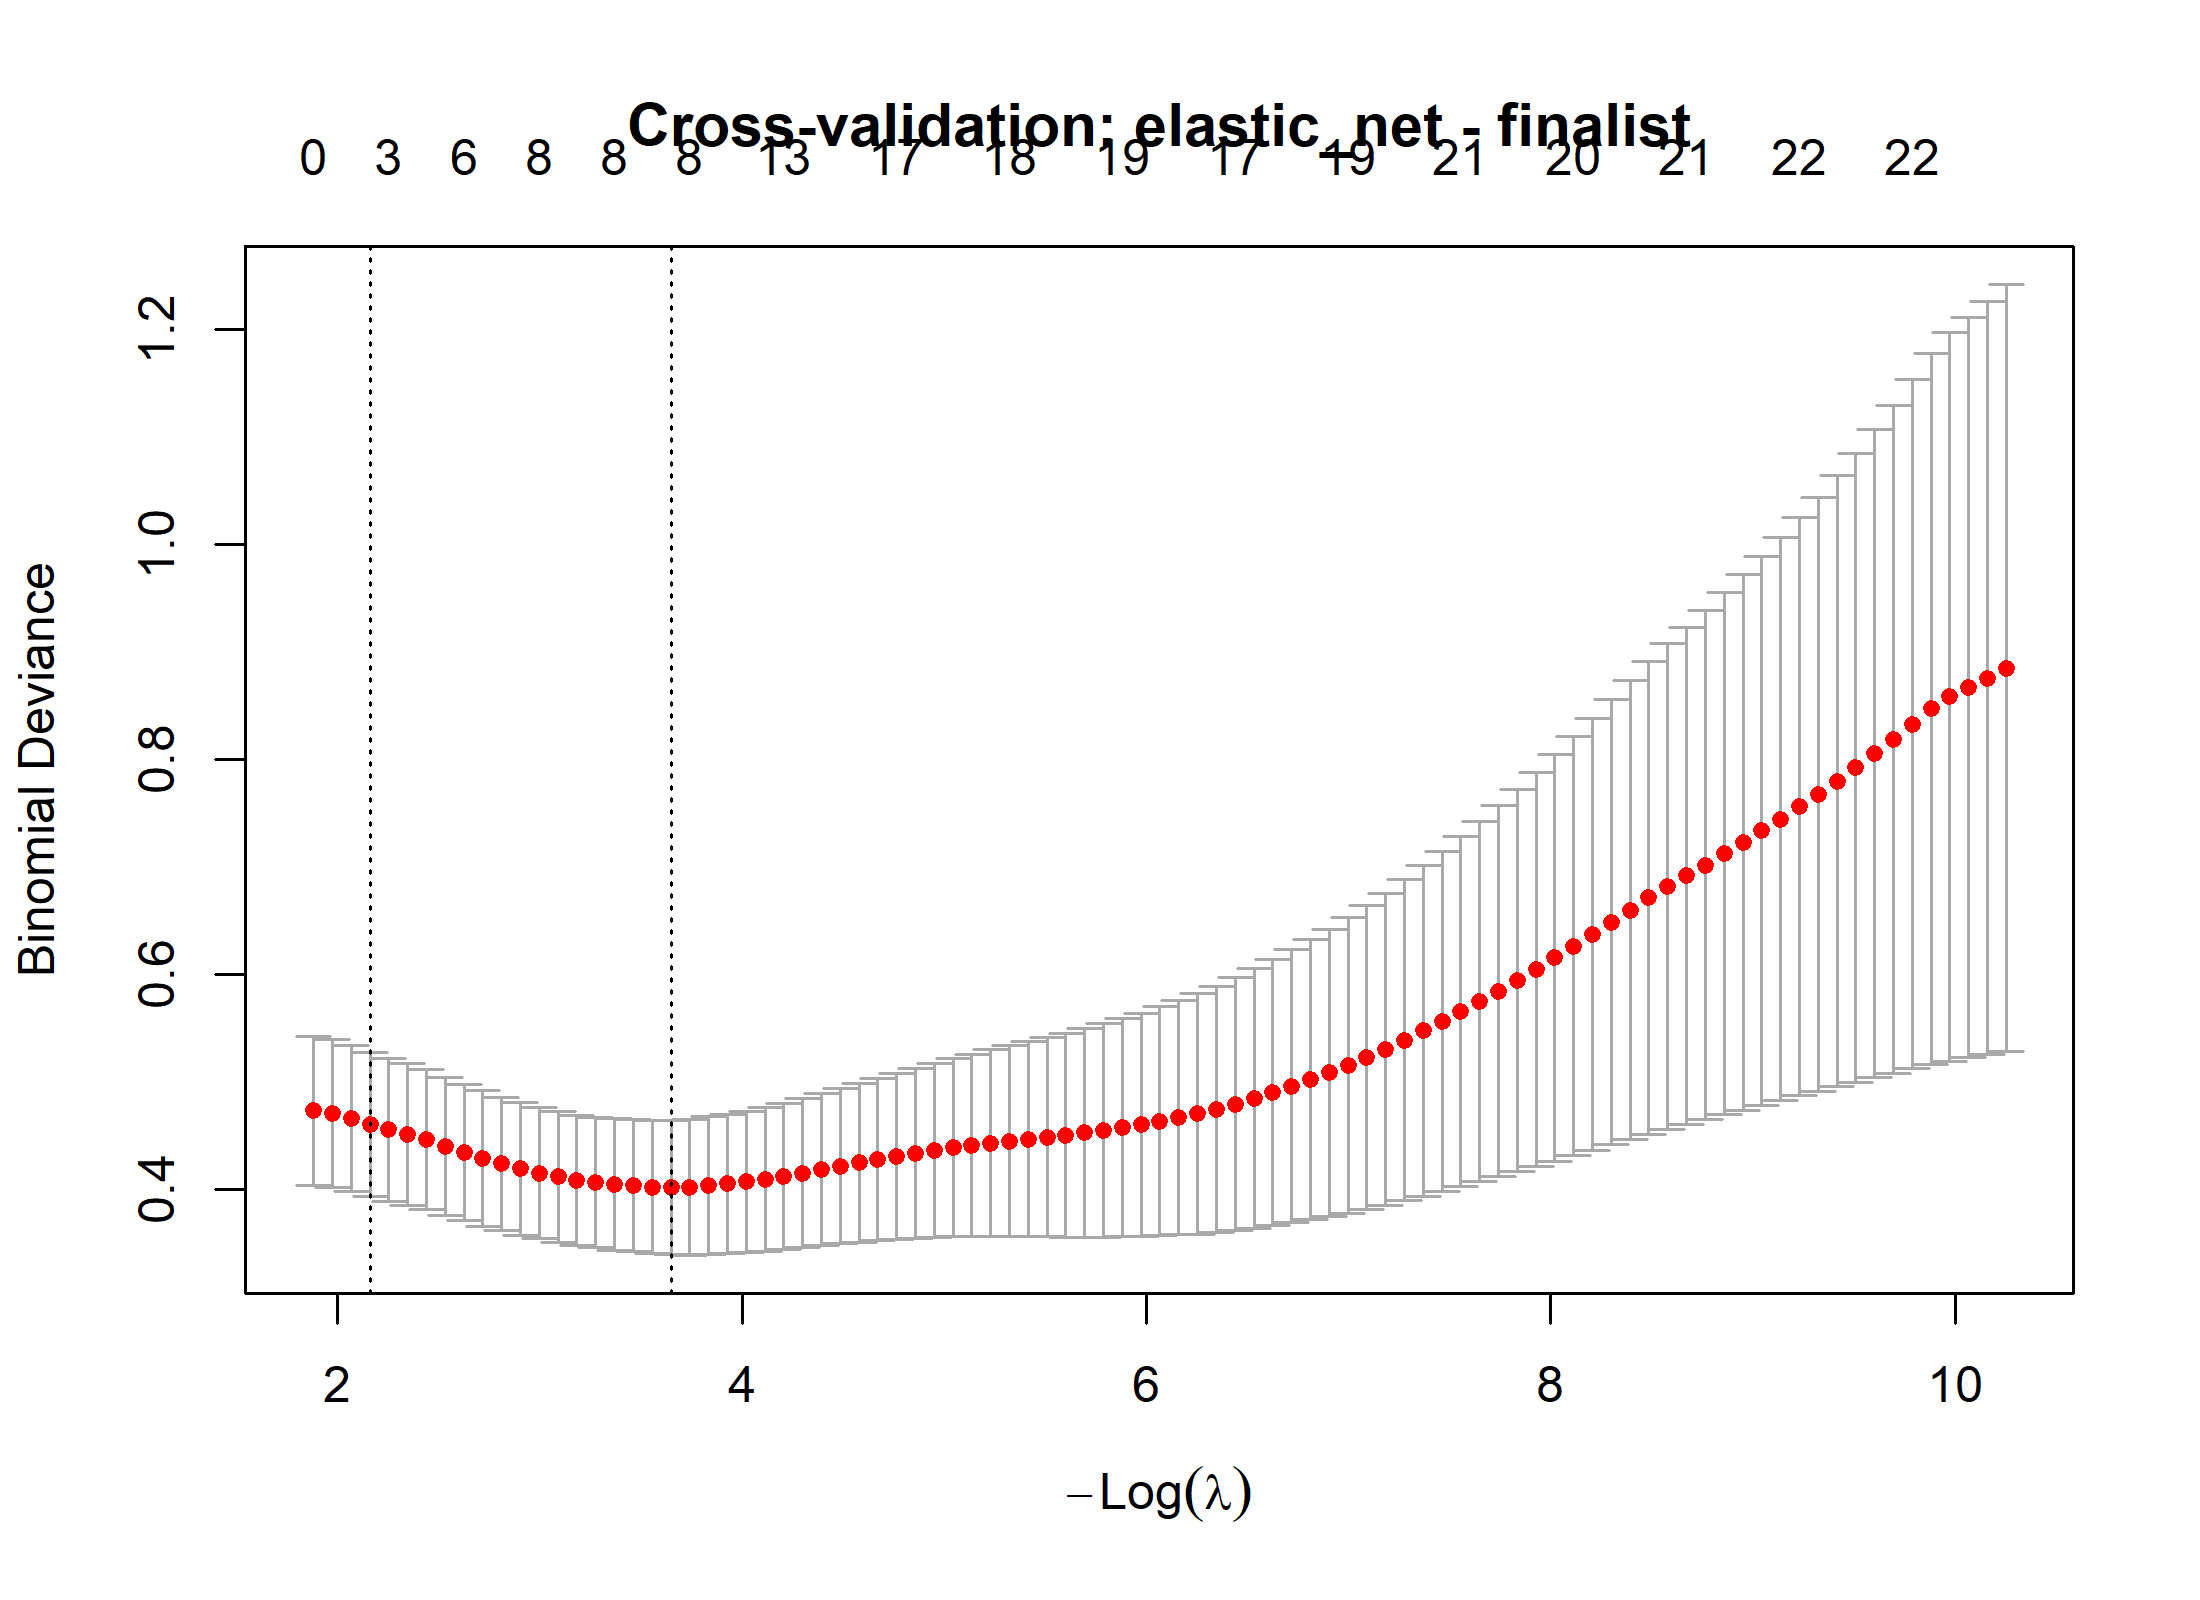

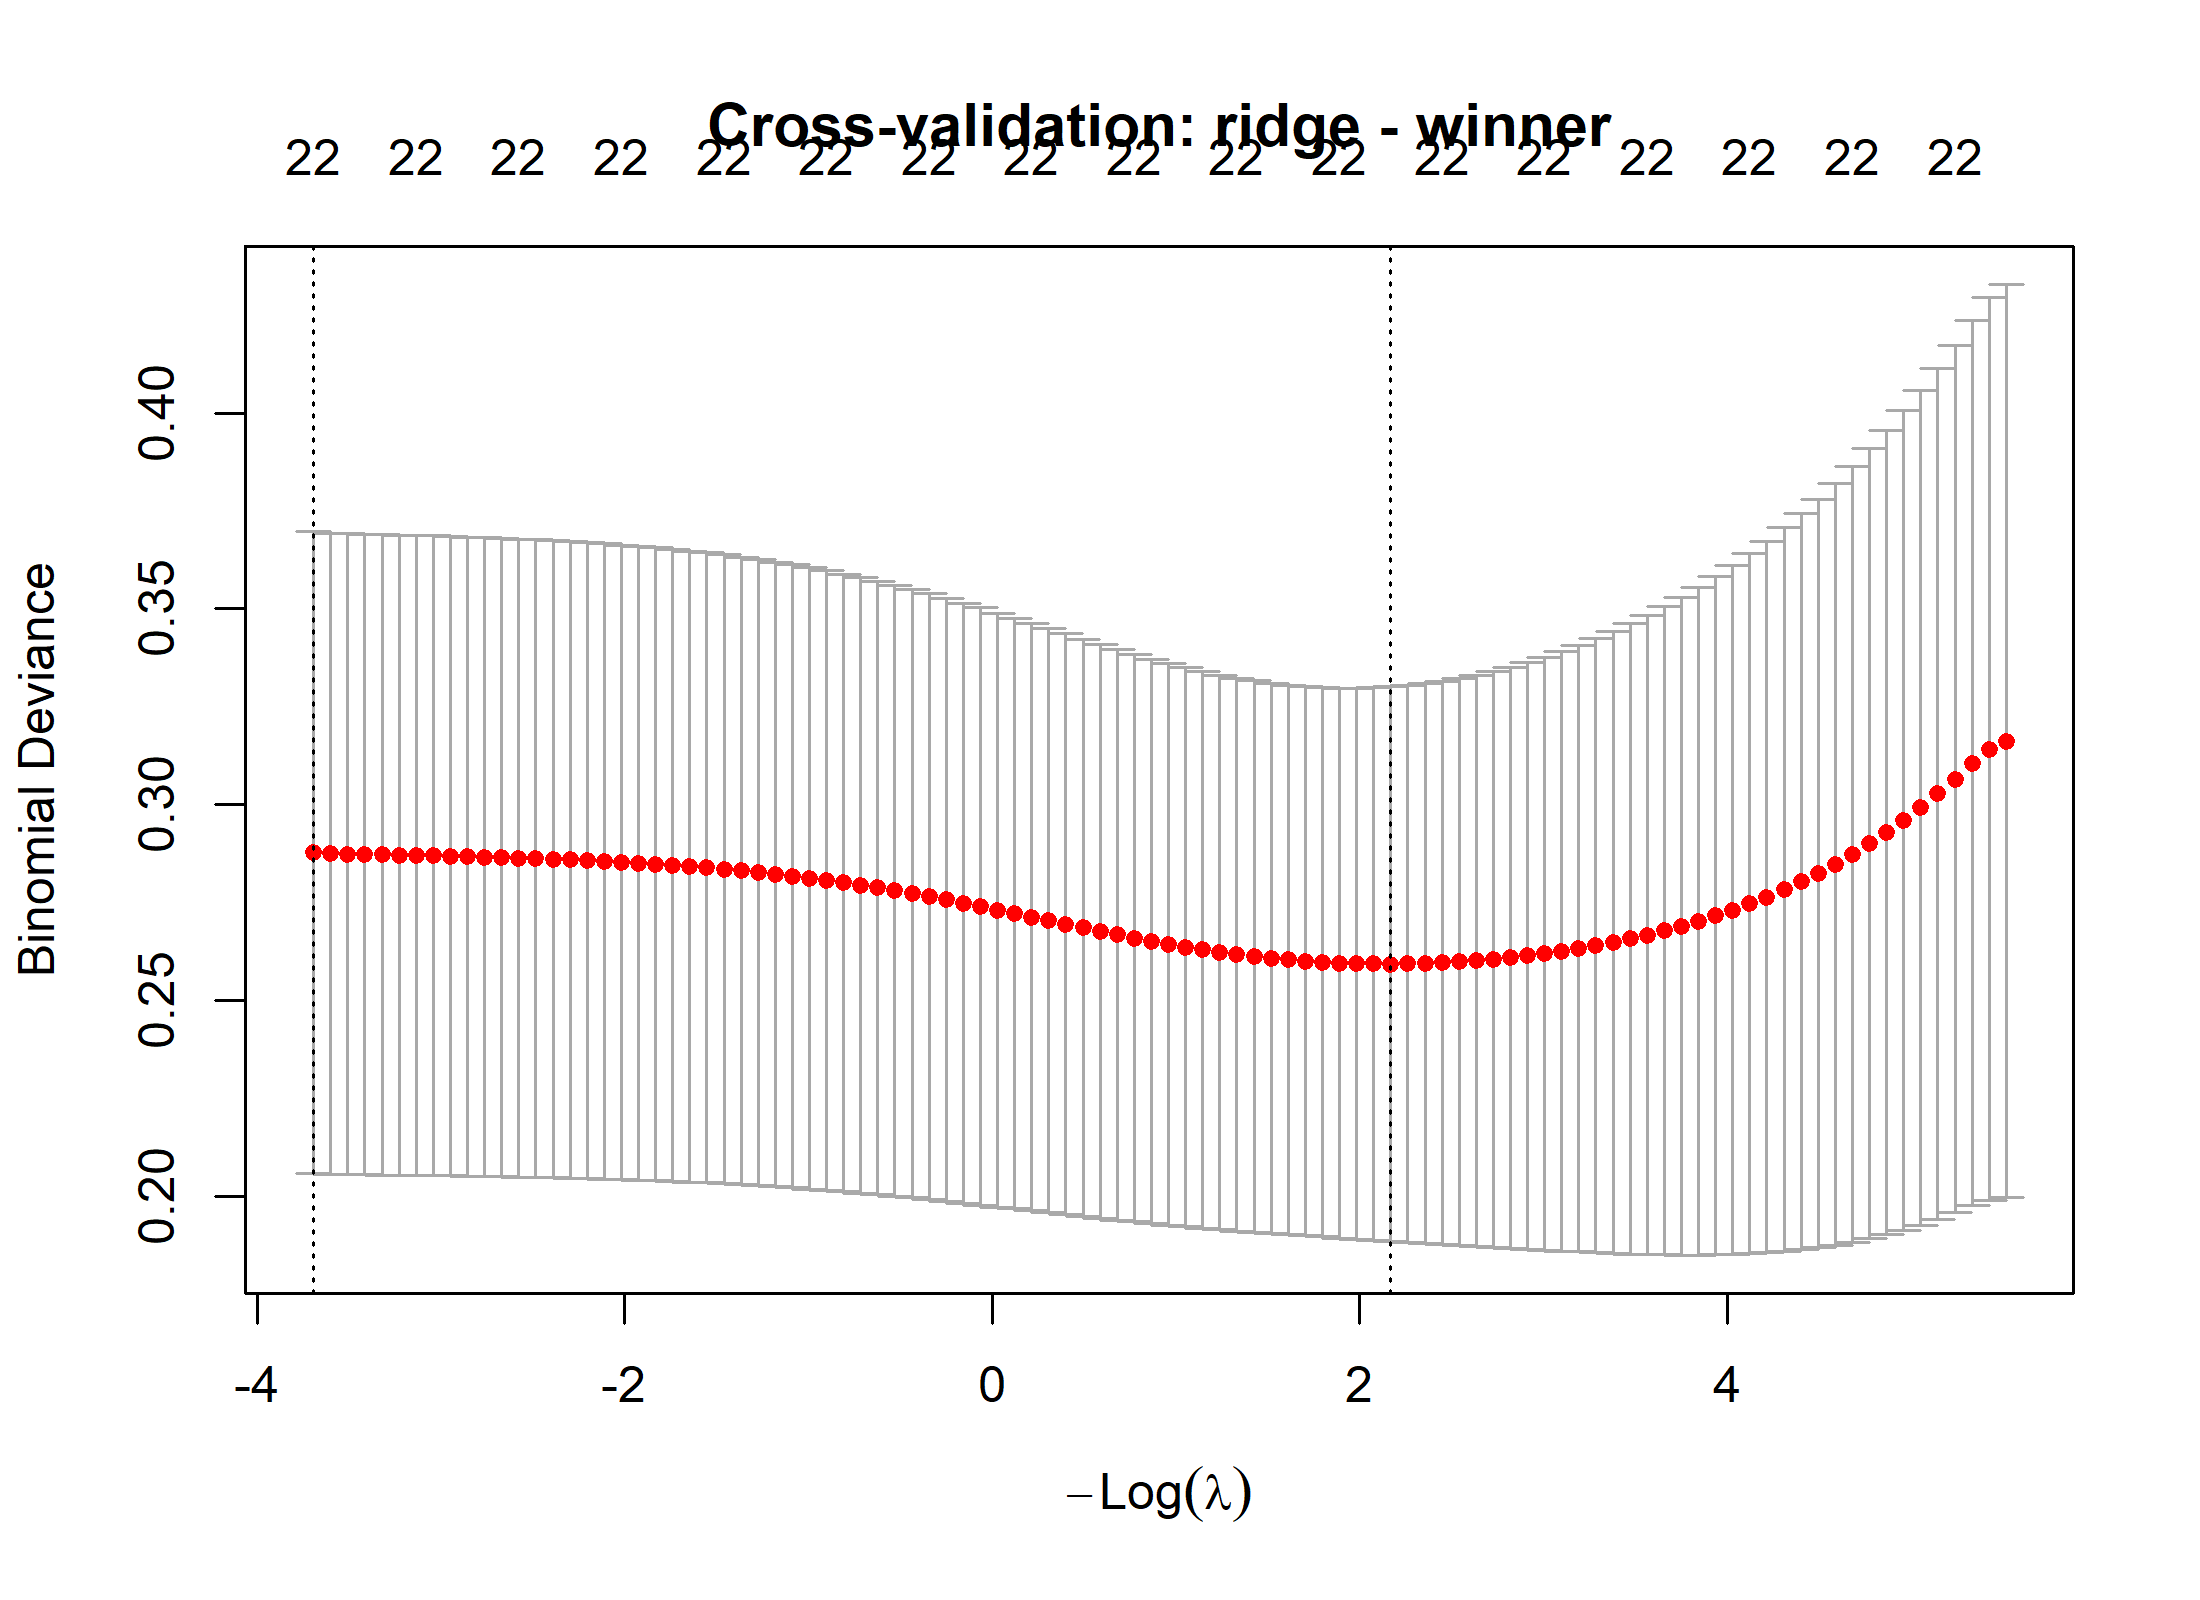


**Supplementary Figure S2.**

**Calibration Curves for FIFA World Cup Tournament Progression Models**


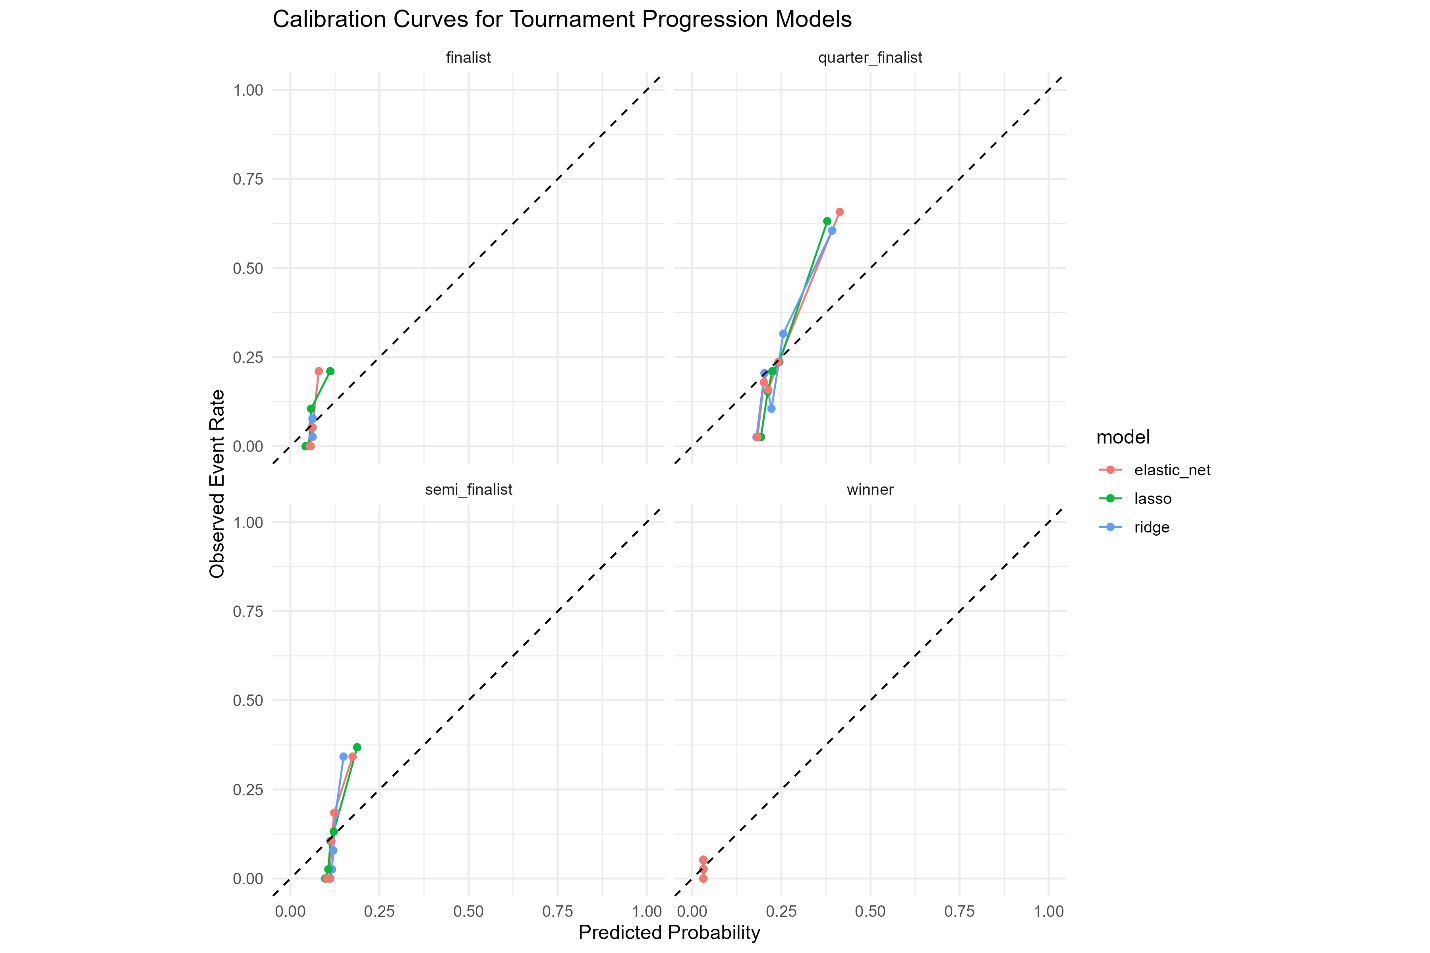


**Supplementary Figure S2**

**Coefficient Paths for Lasso and Elastic Net Models**


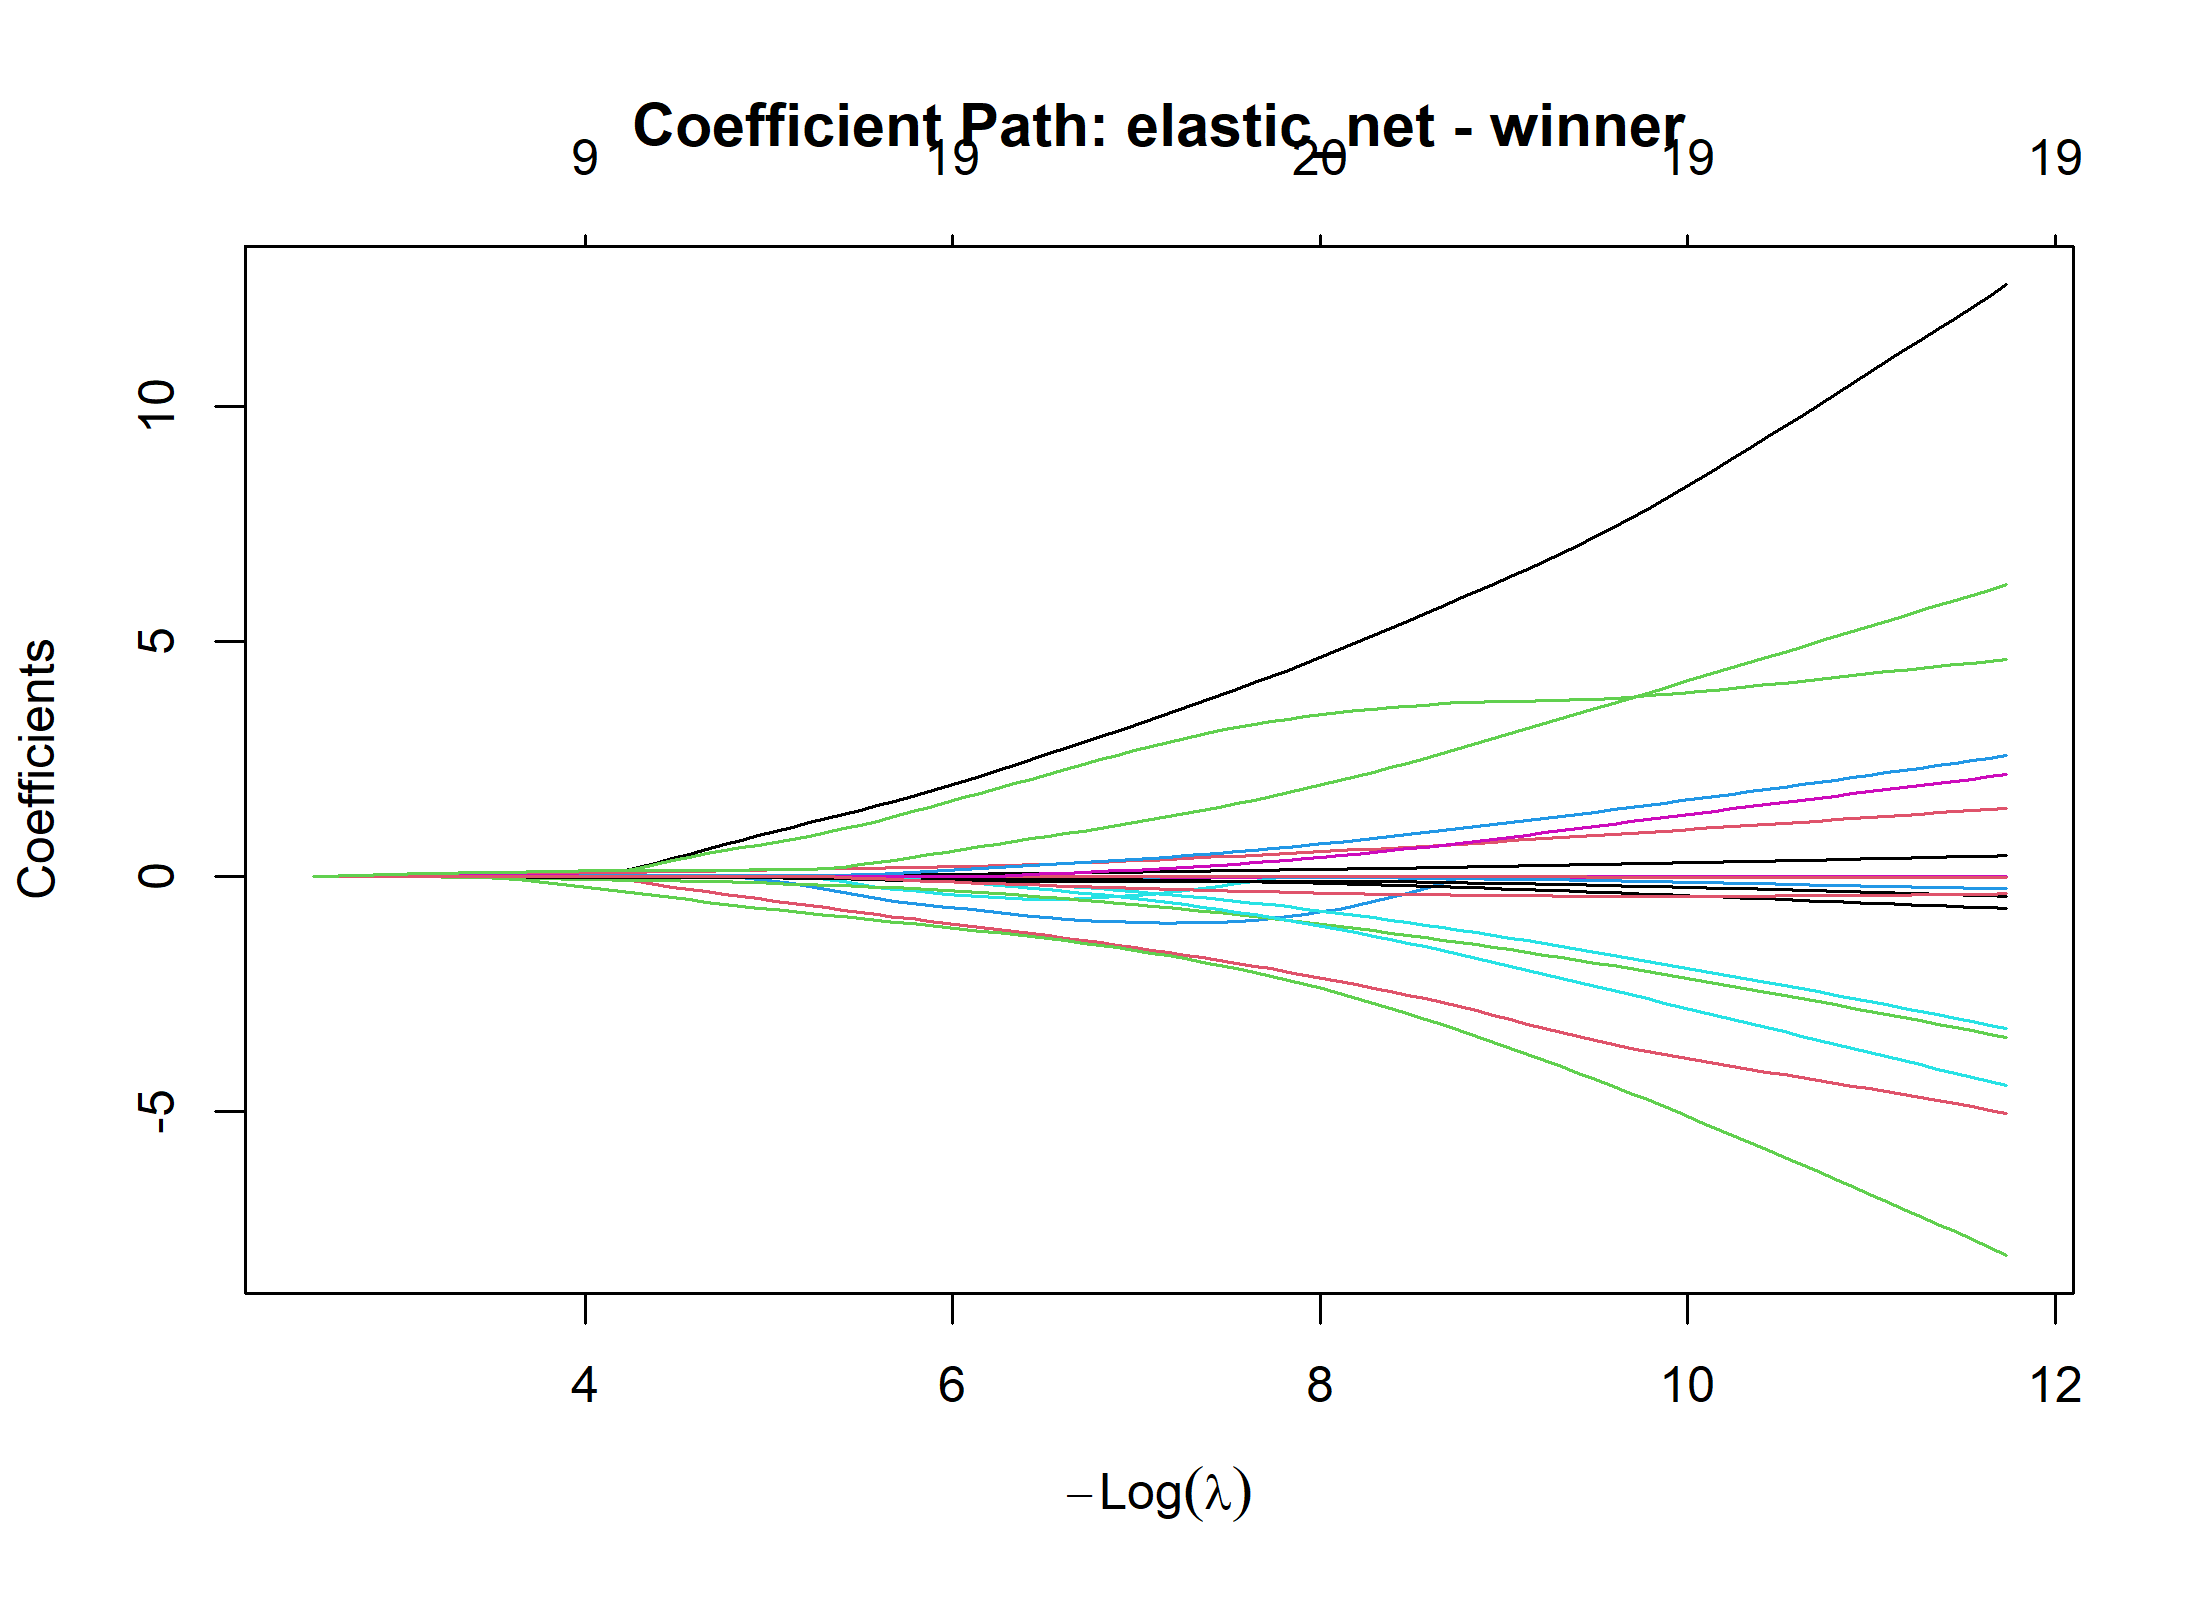

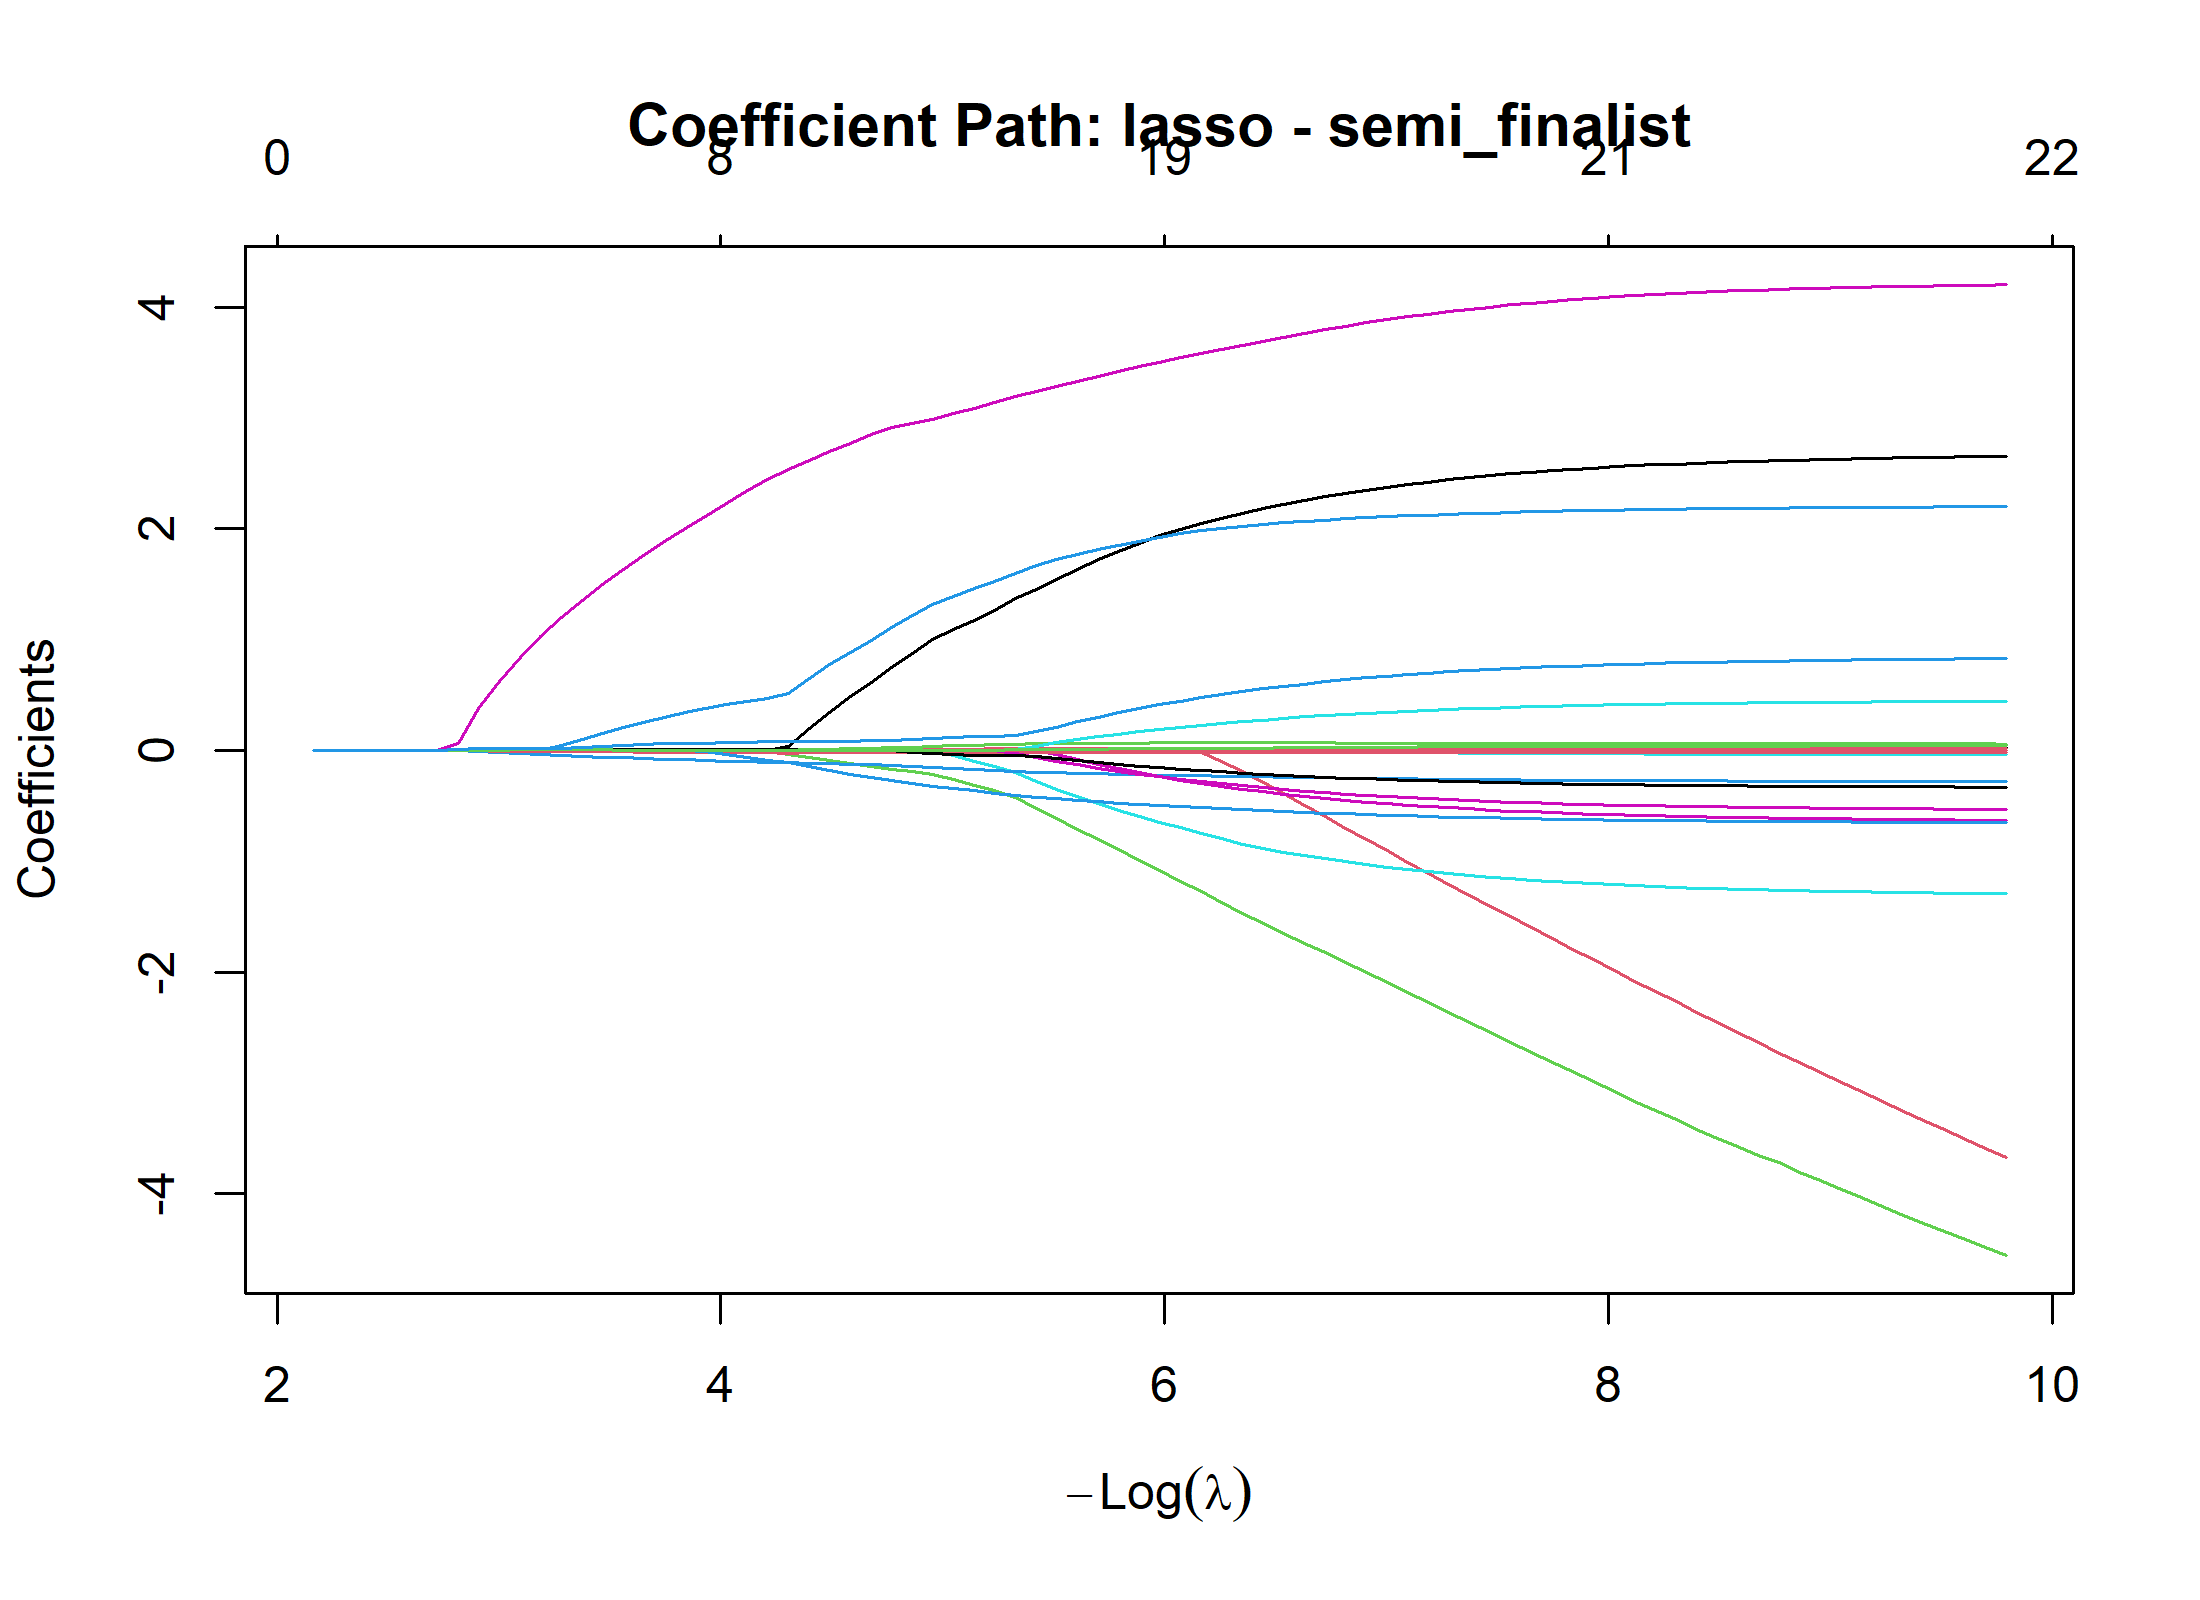

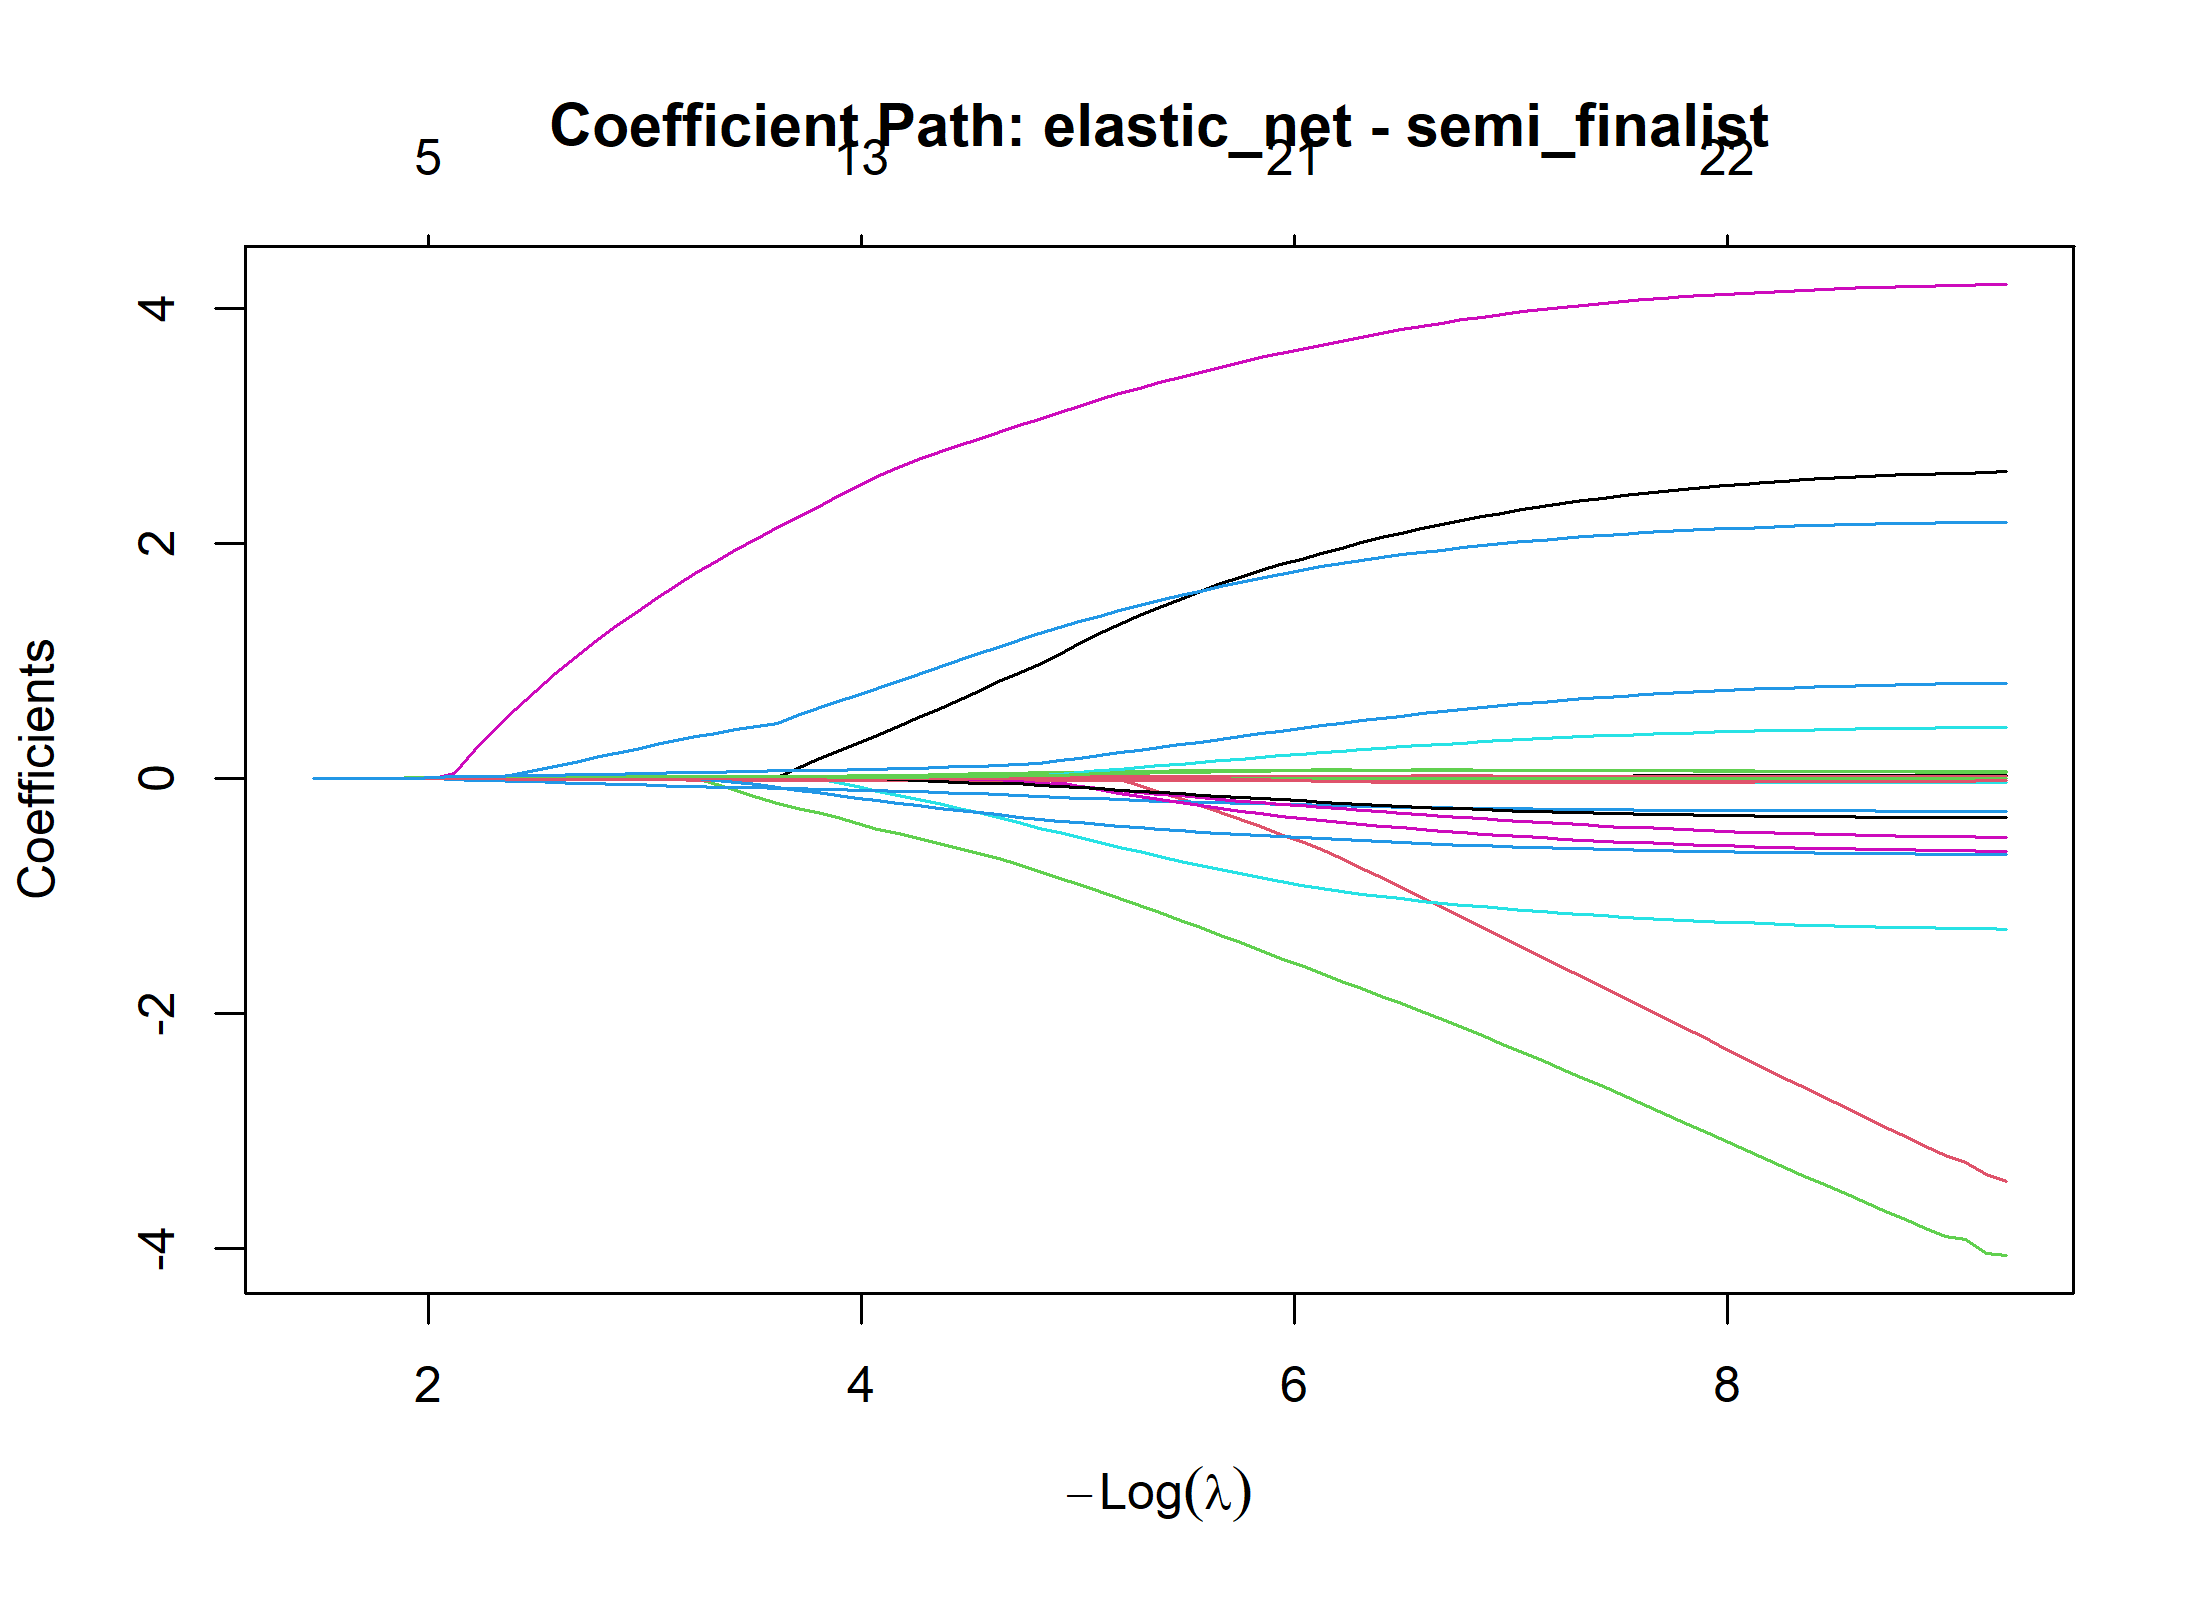

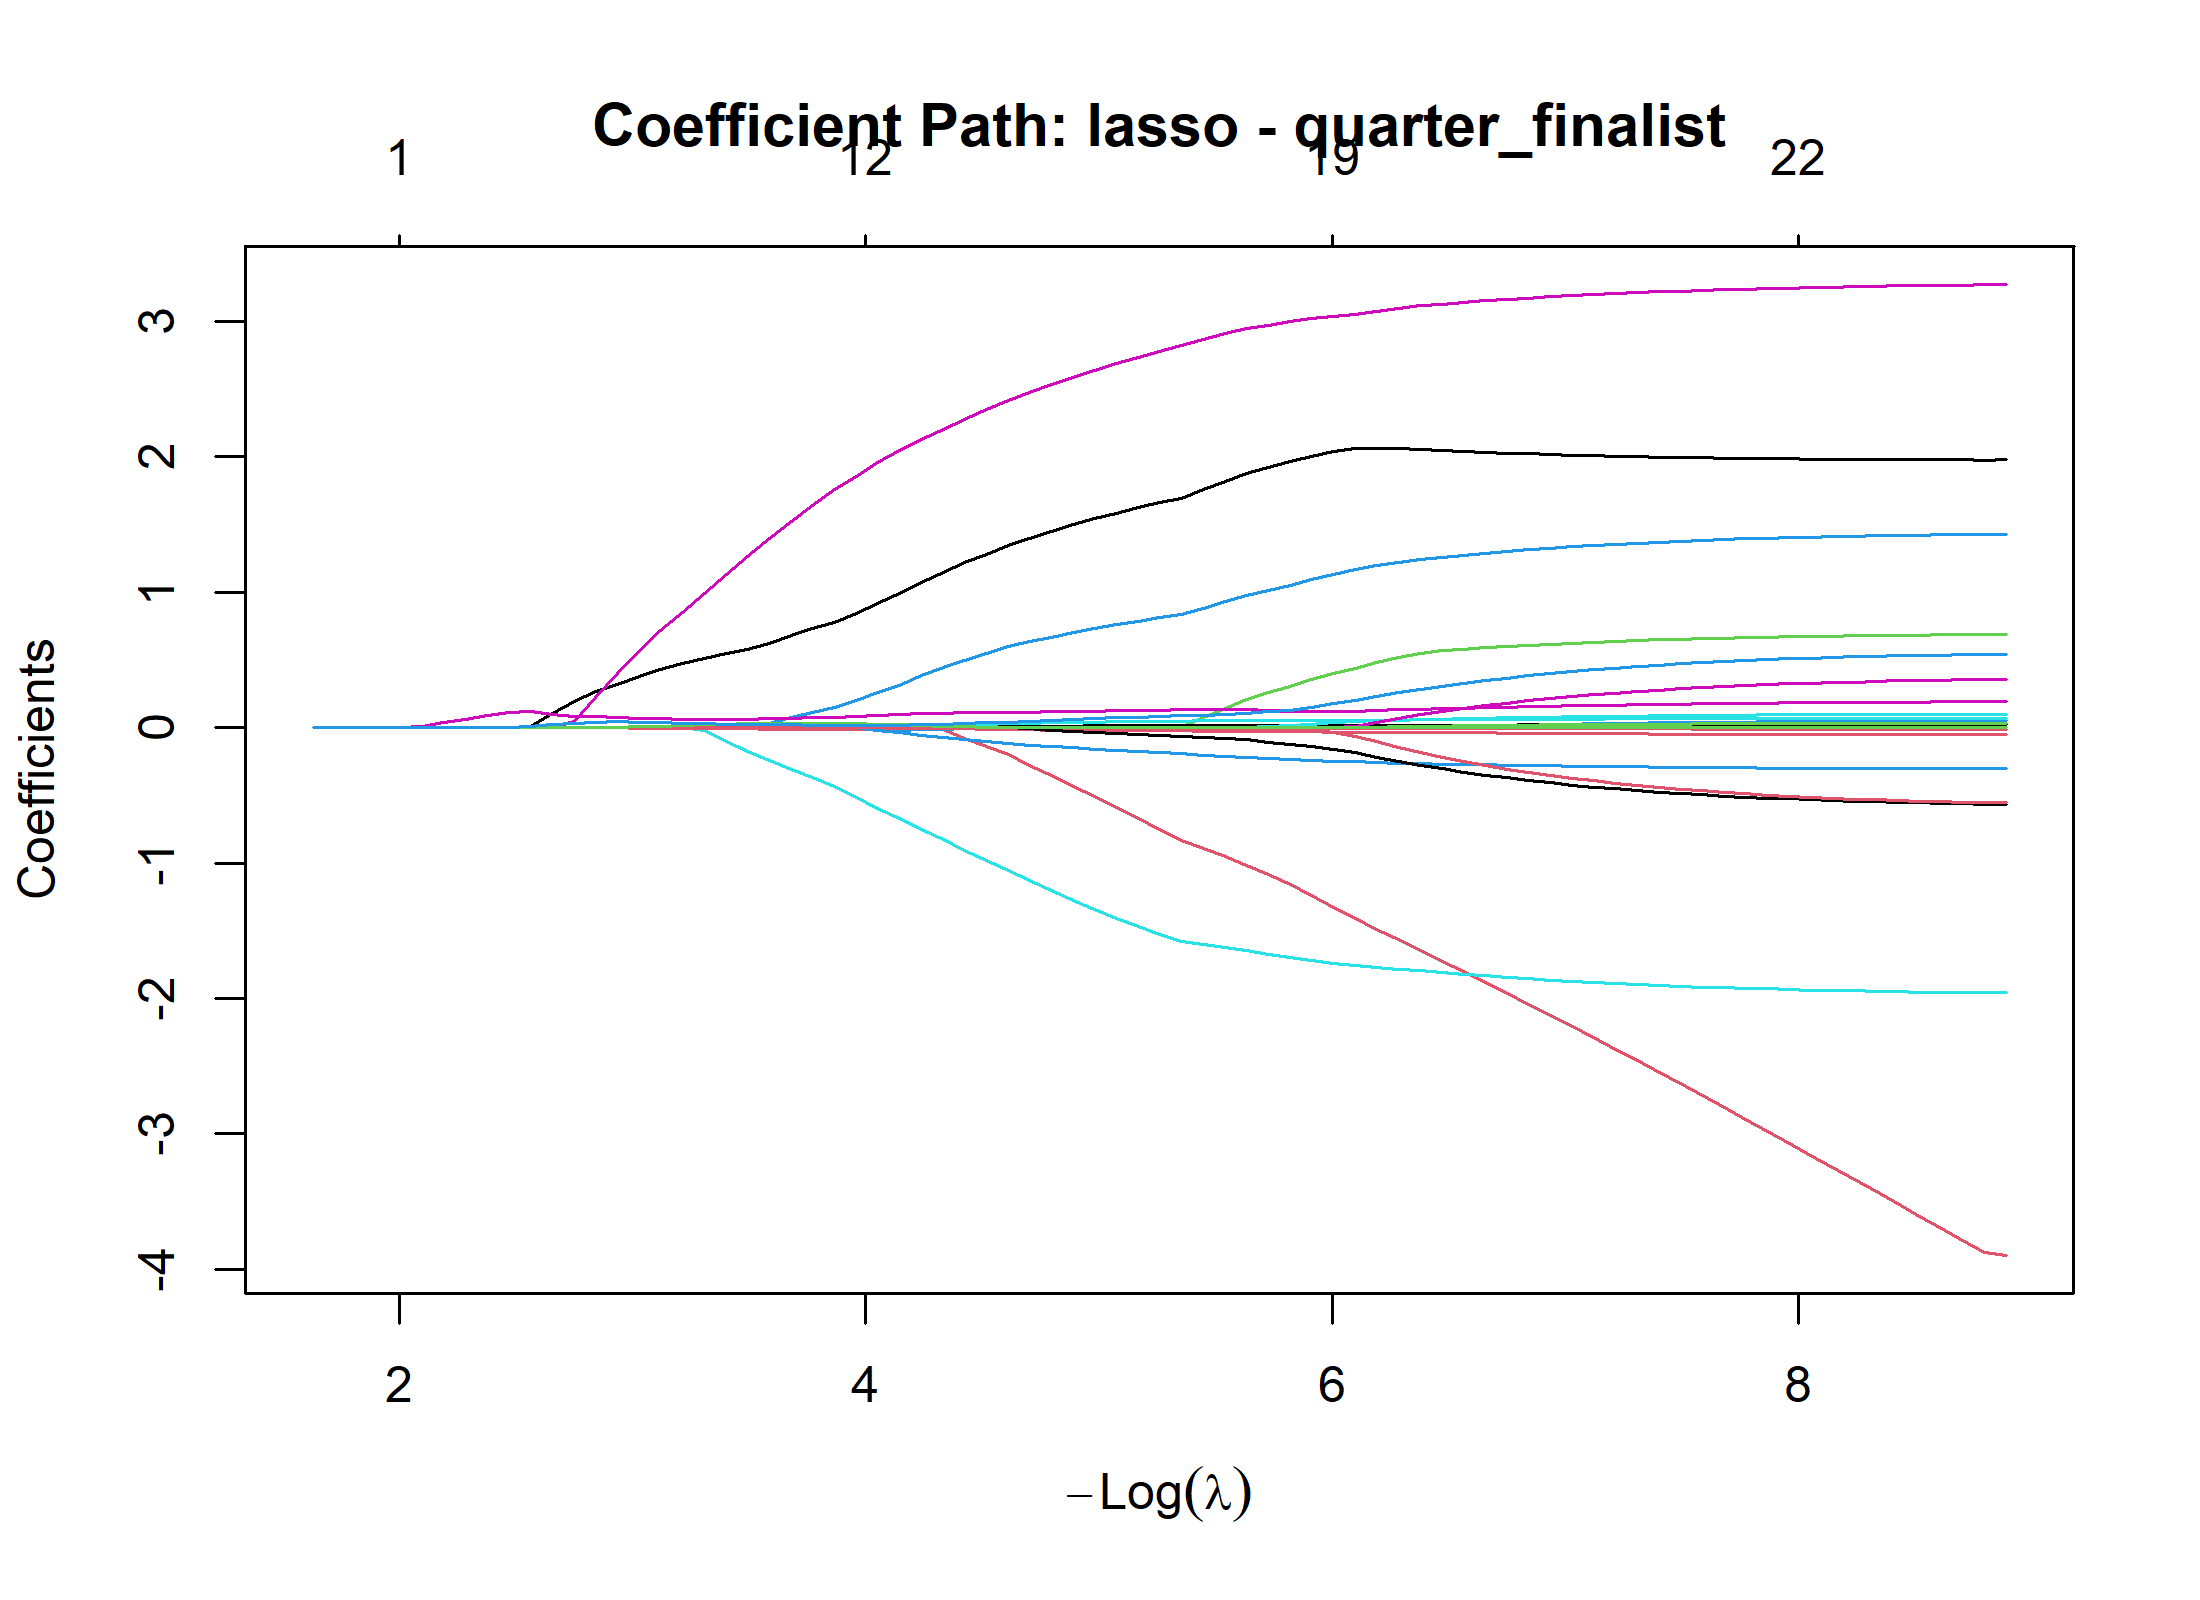

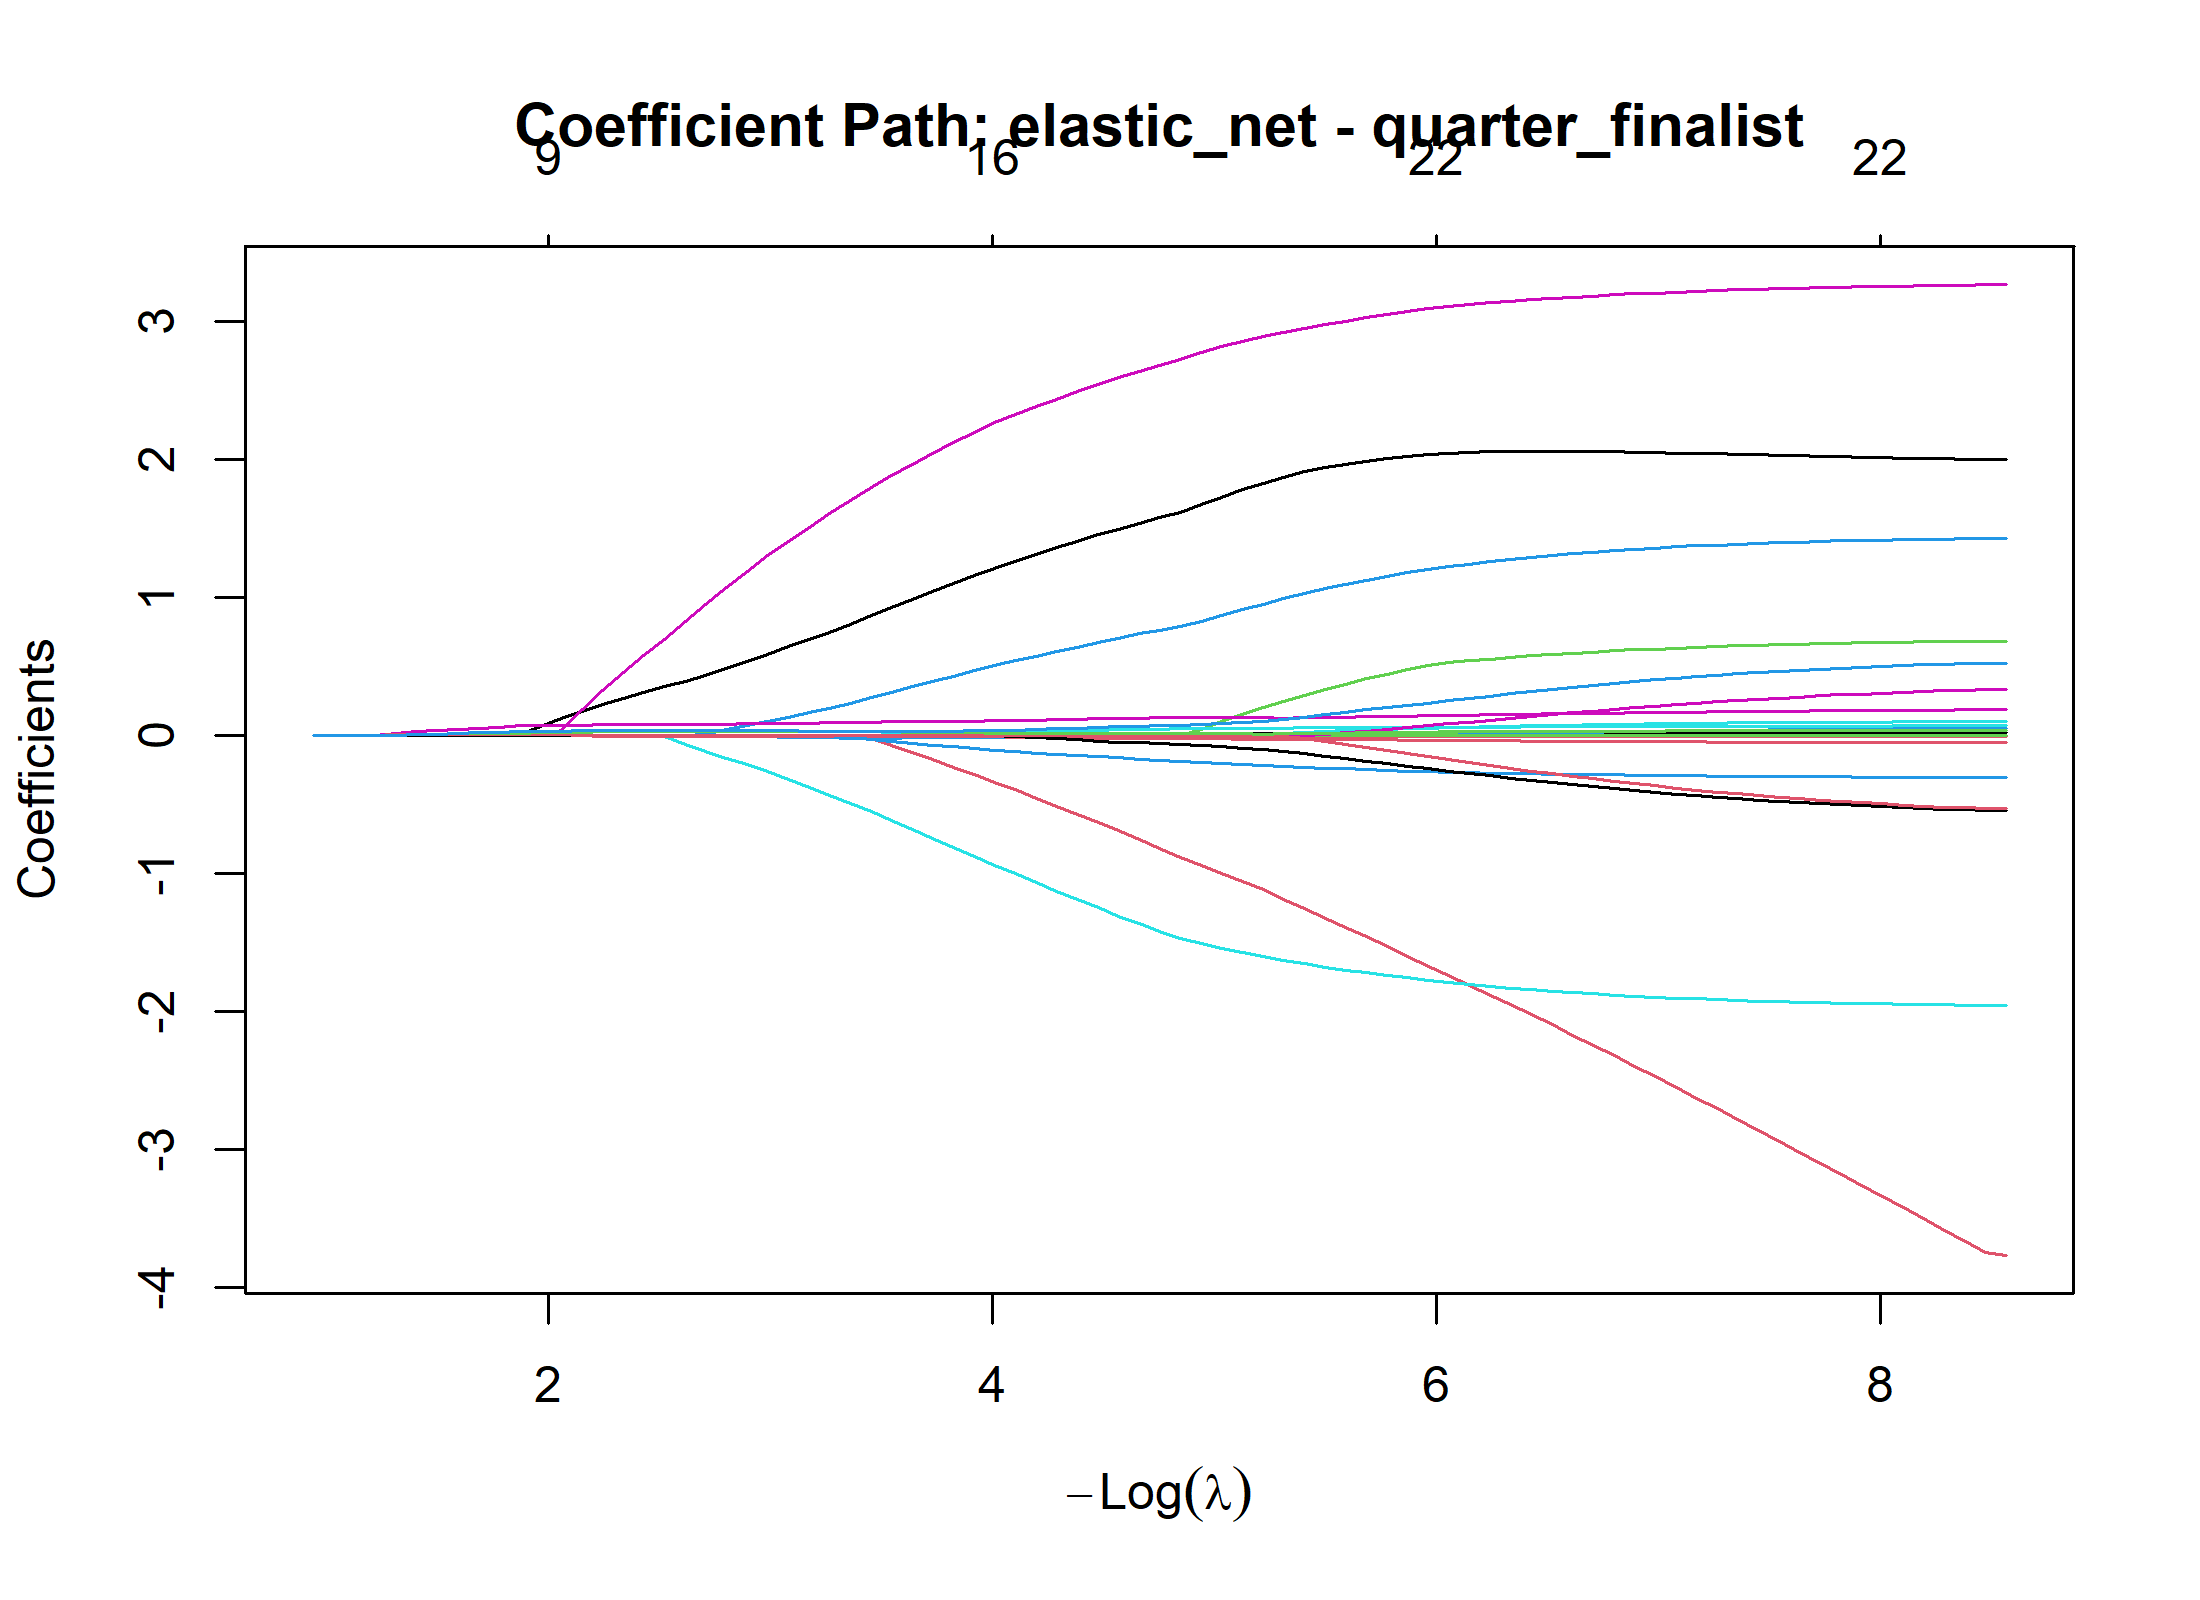

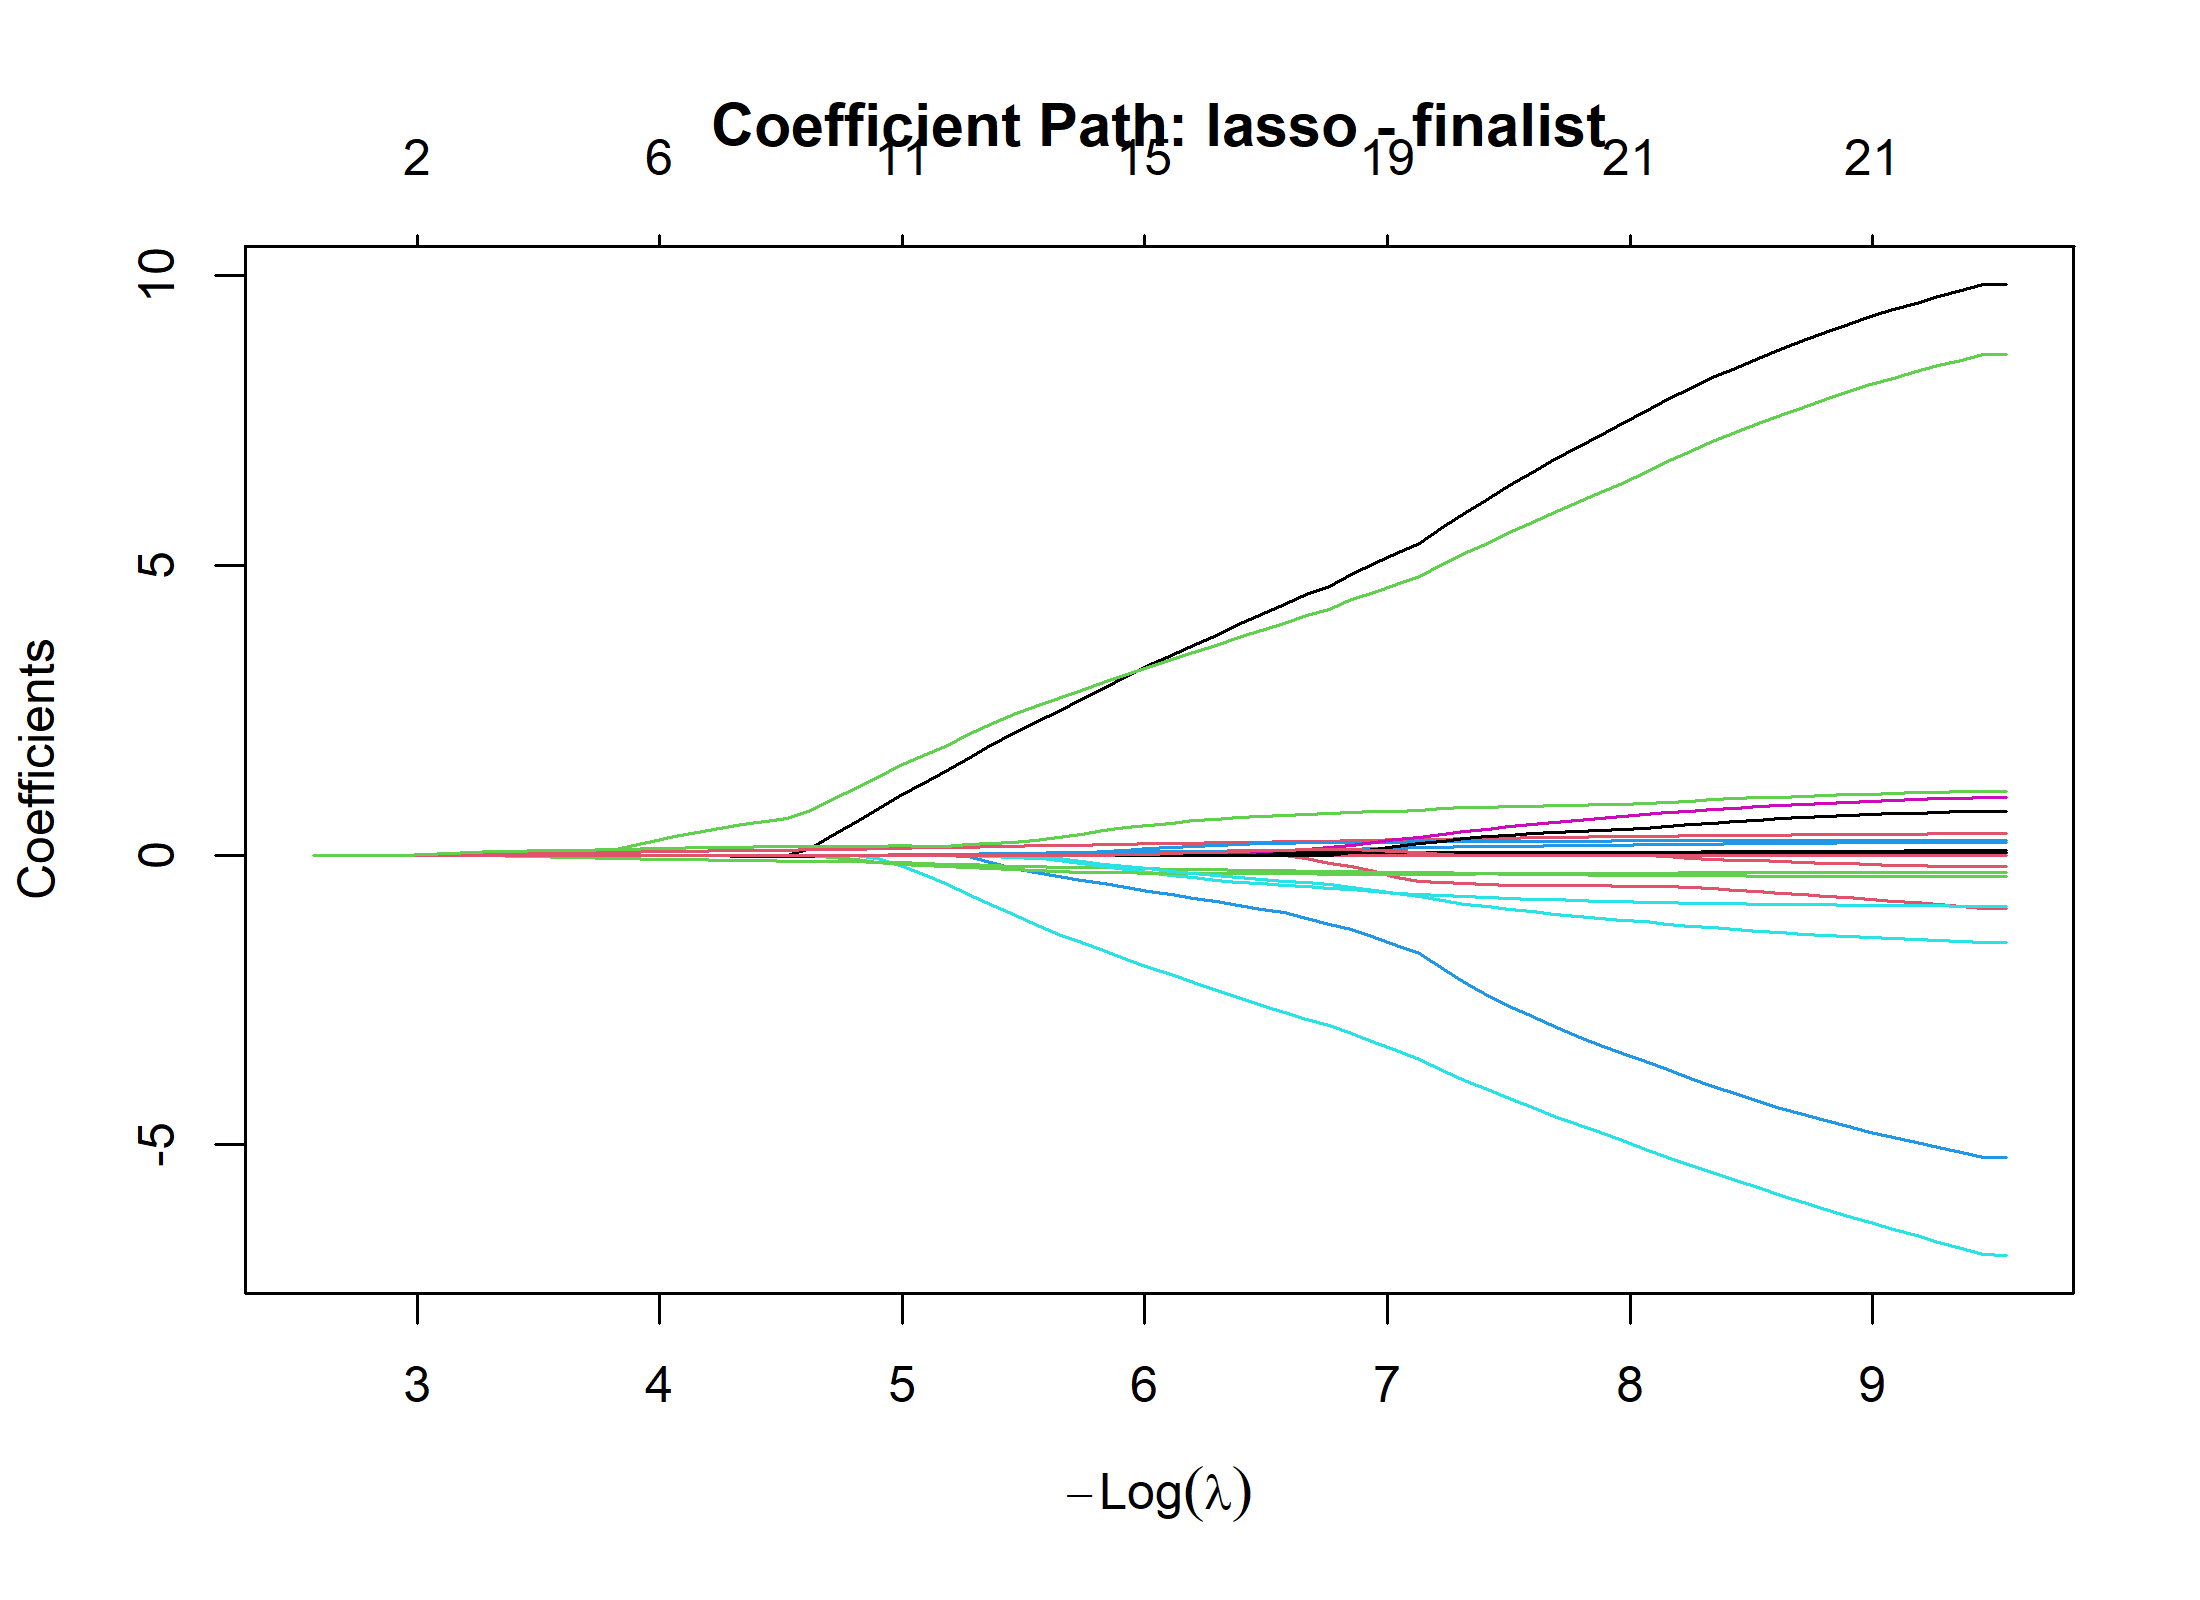

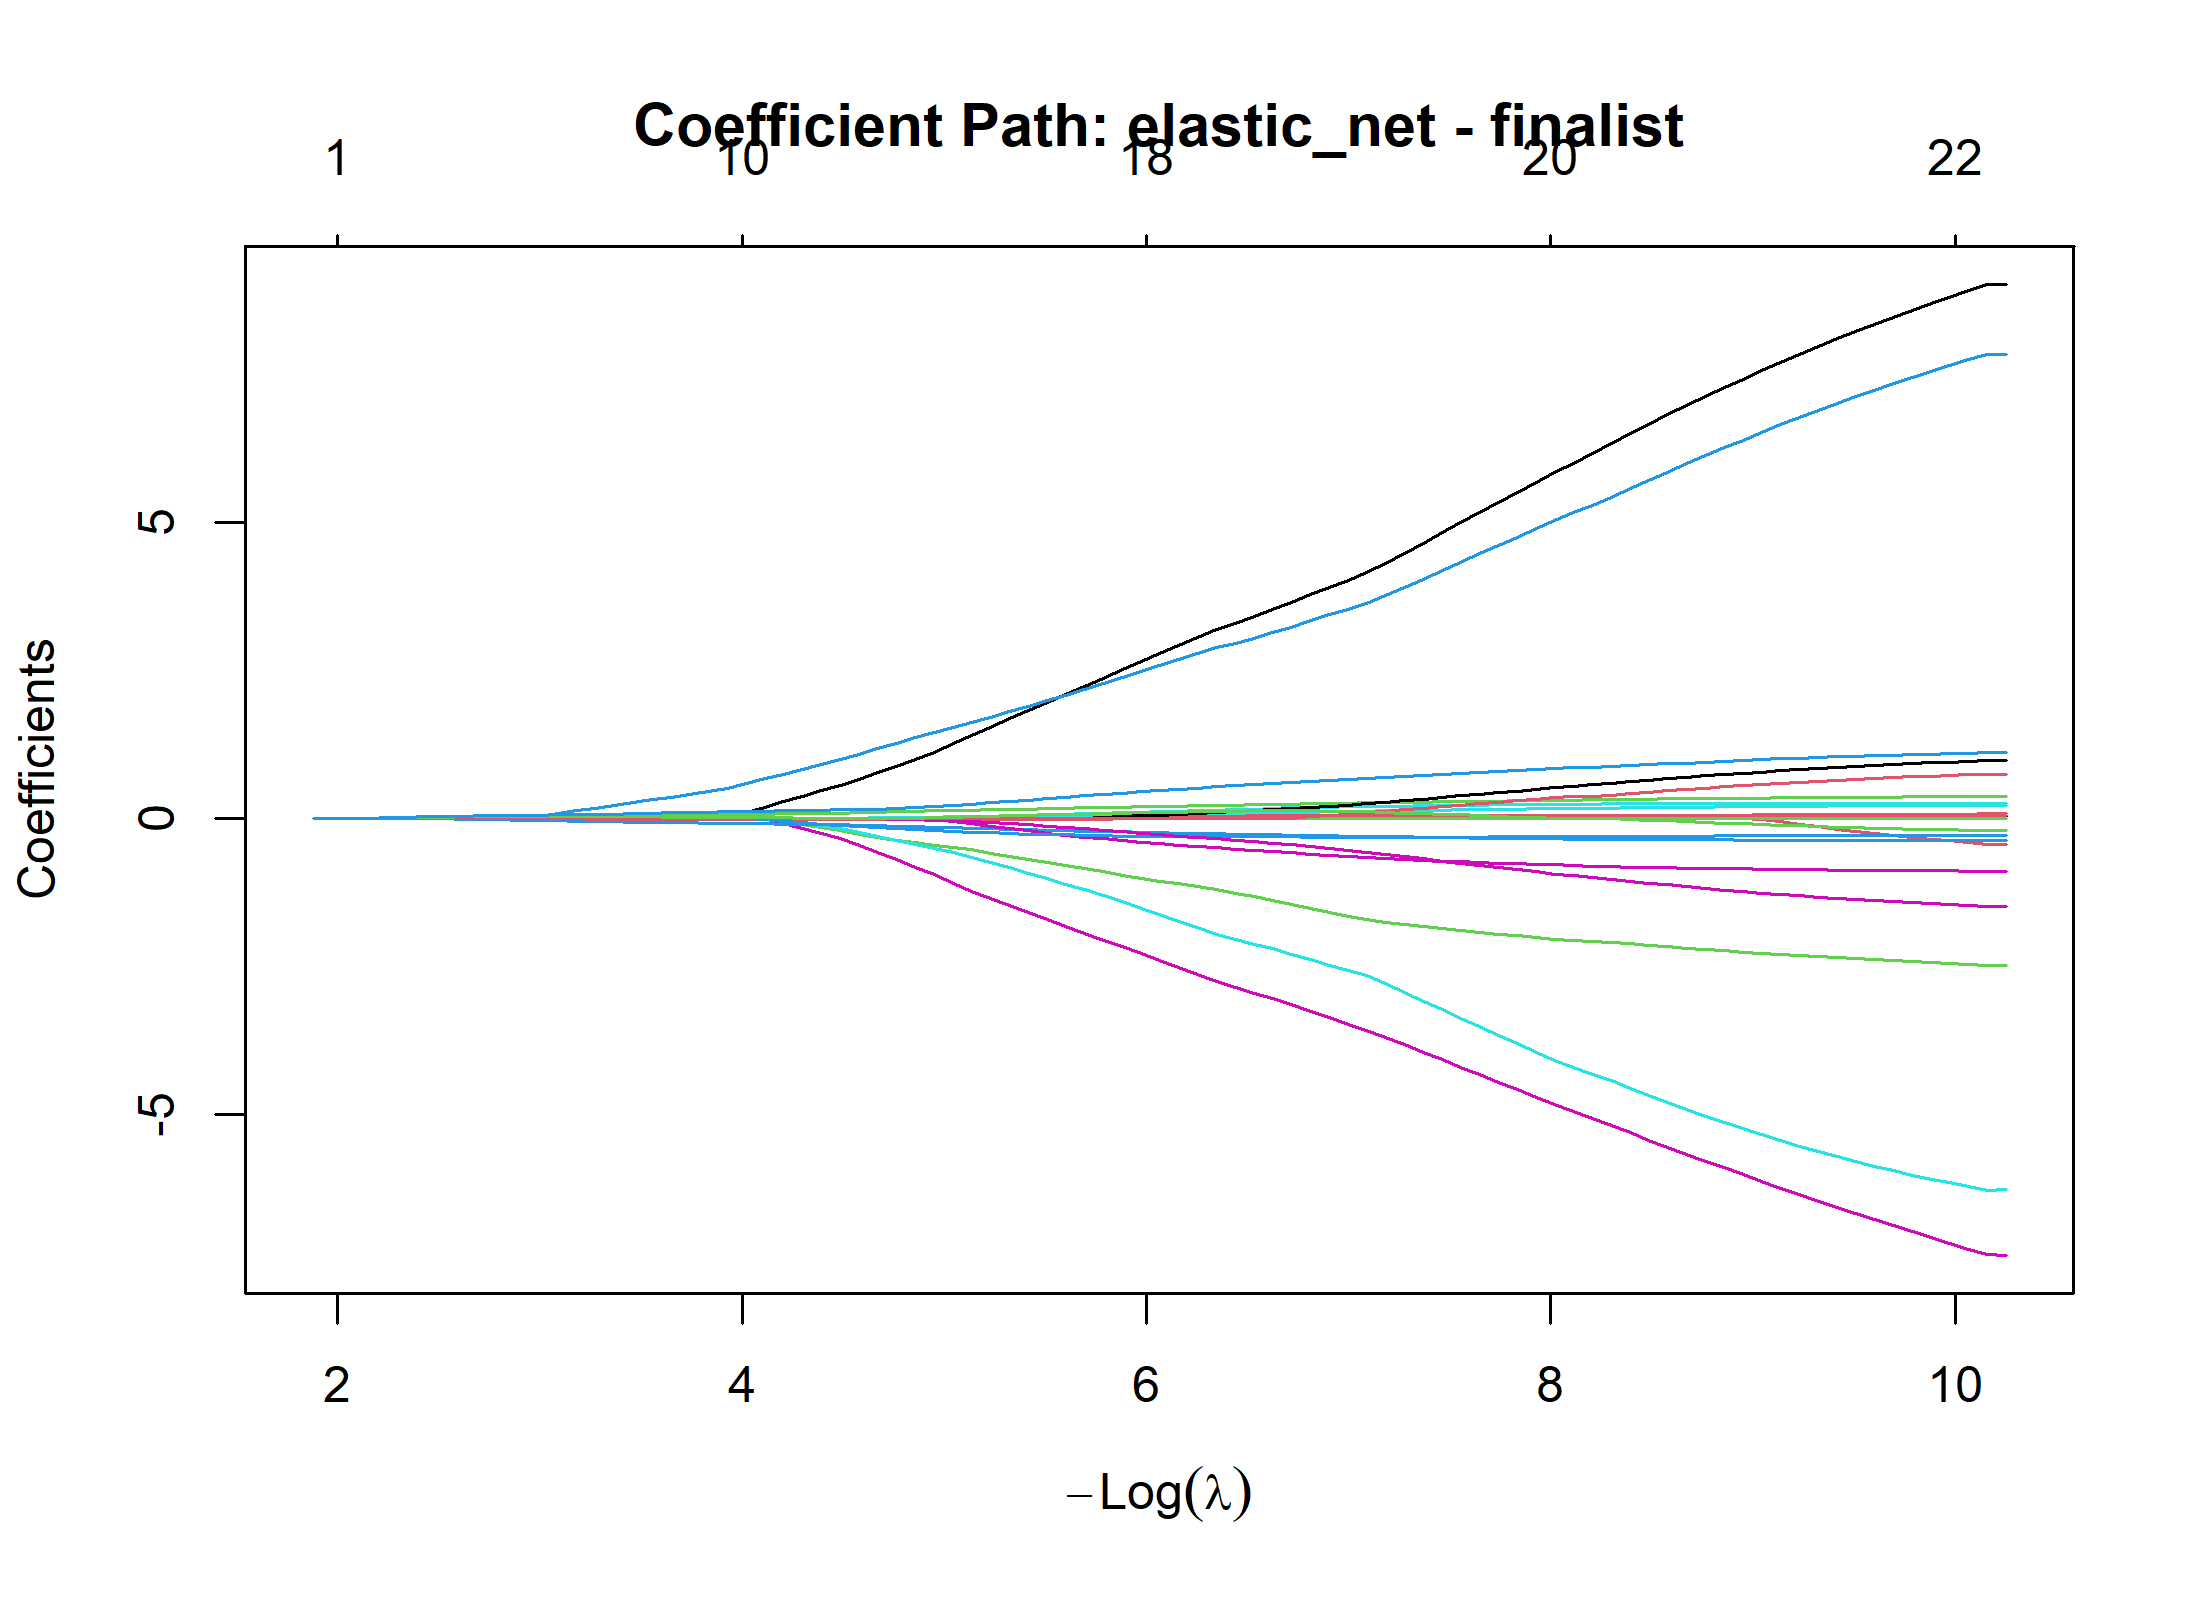

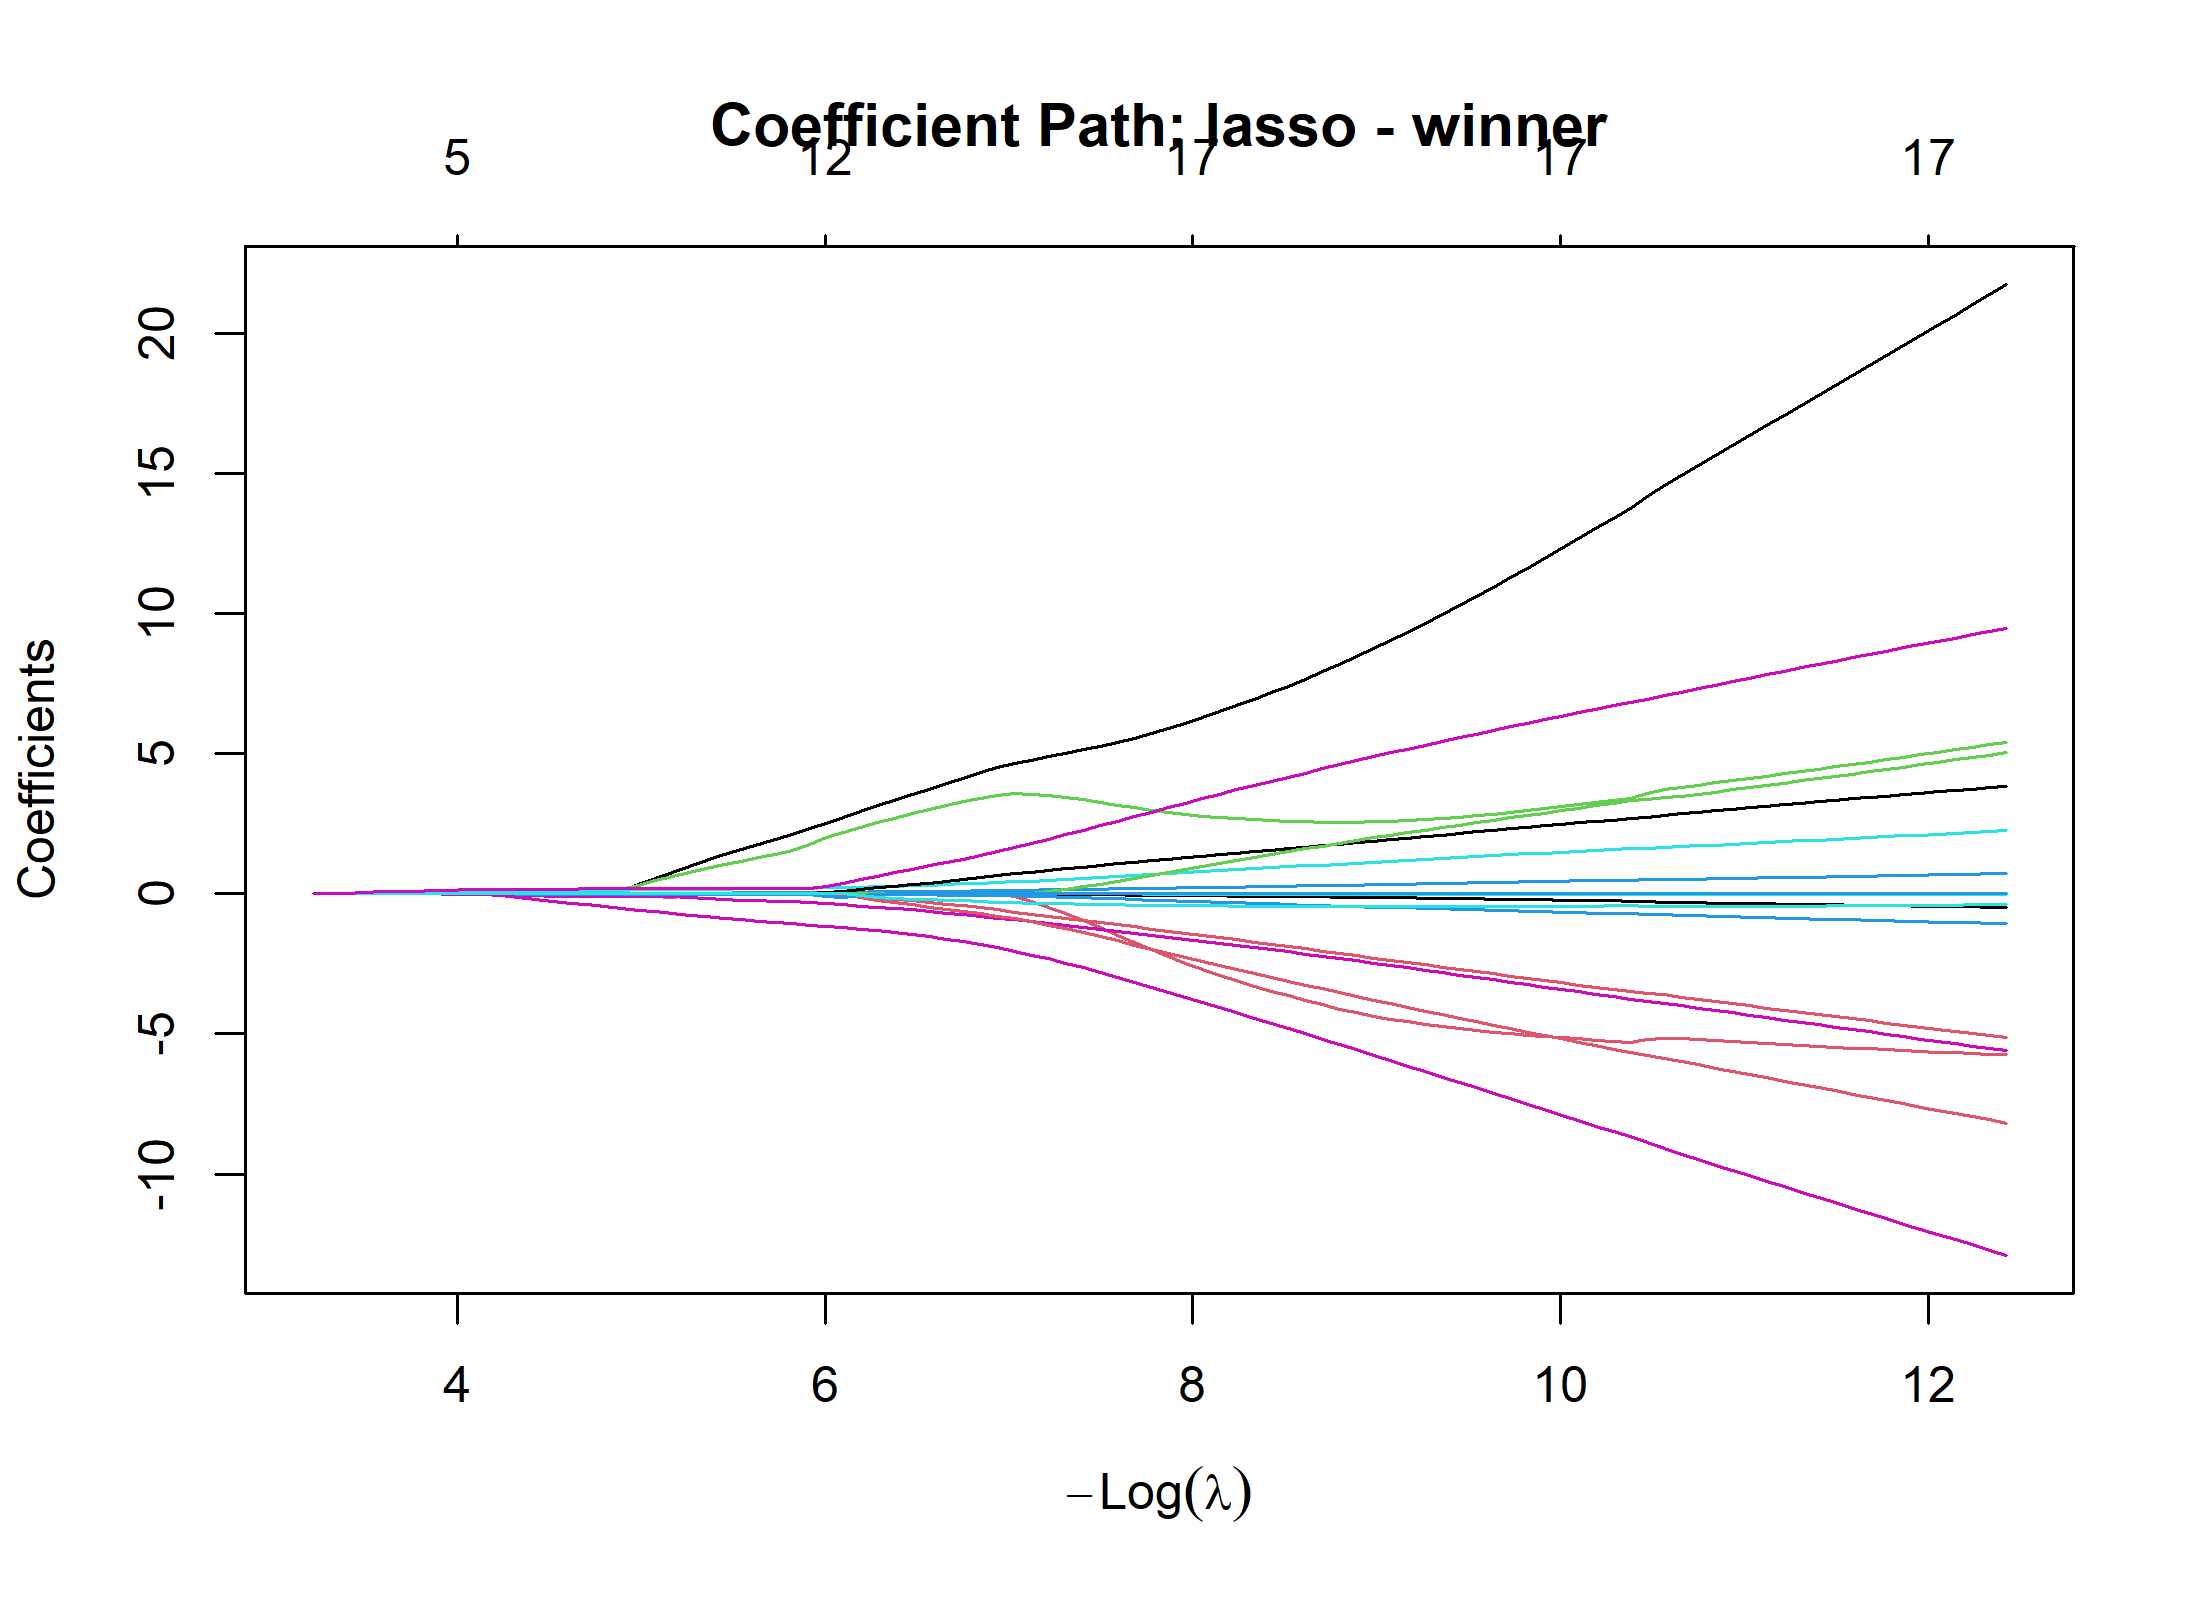


**Supplementary Figure S3**

**Predicted Probabilities of FIFA World Cup 2026 Tournament Progression Using Elastic Net Regression**


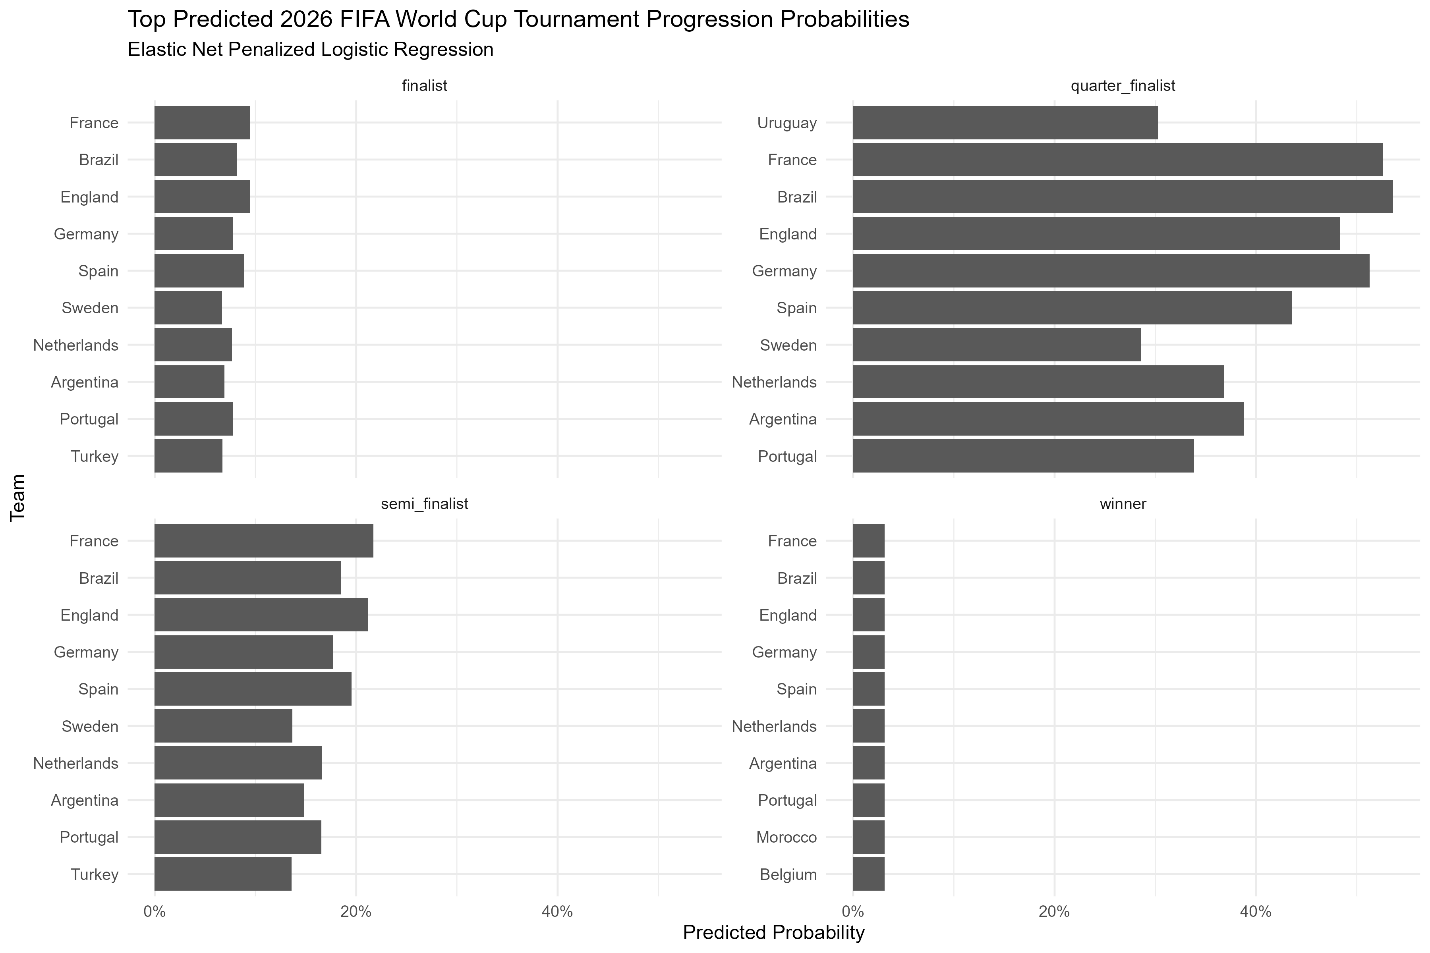


**Supplementary Material**

**Figure S4. Forest Plot of Baseline Logistic Regression Odds Ratios**


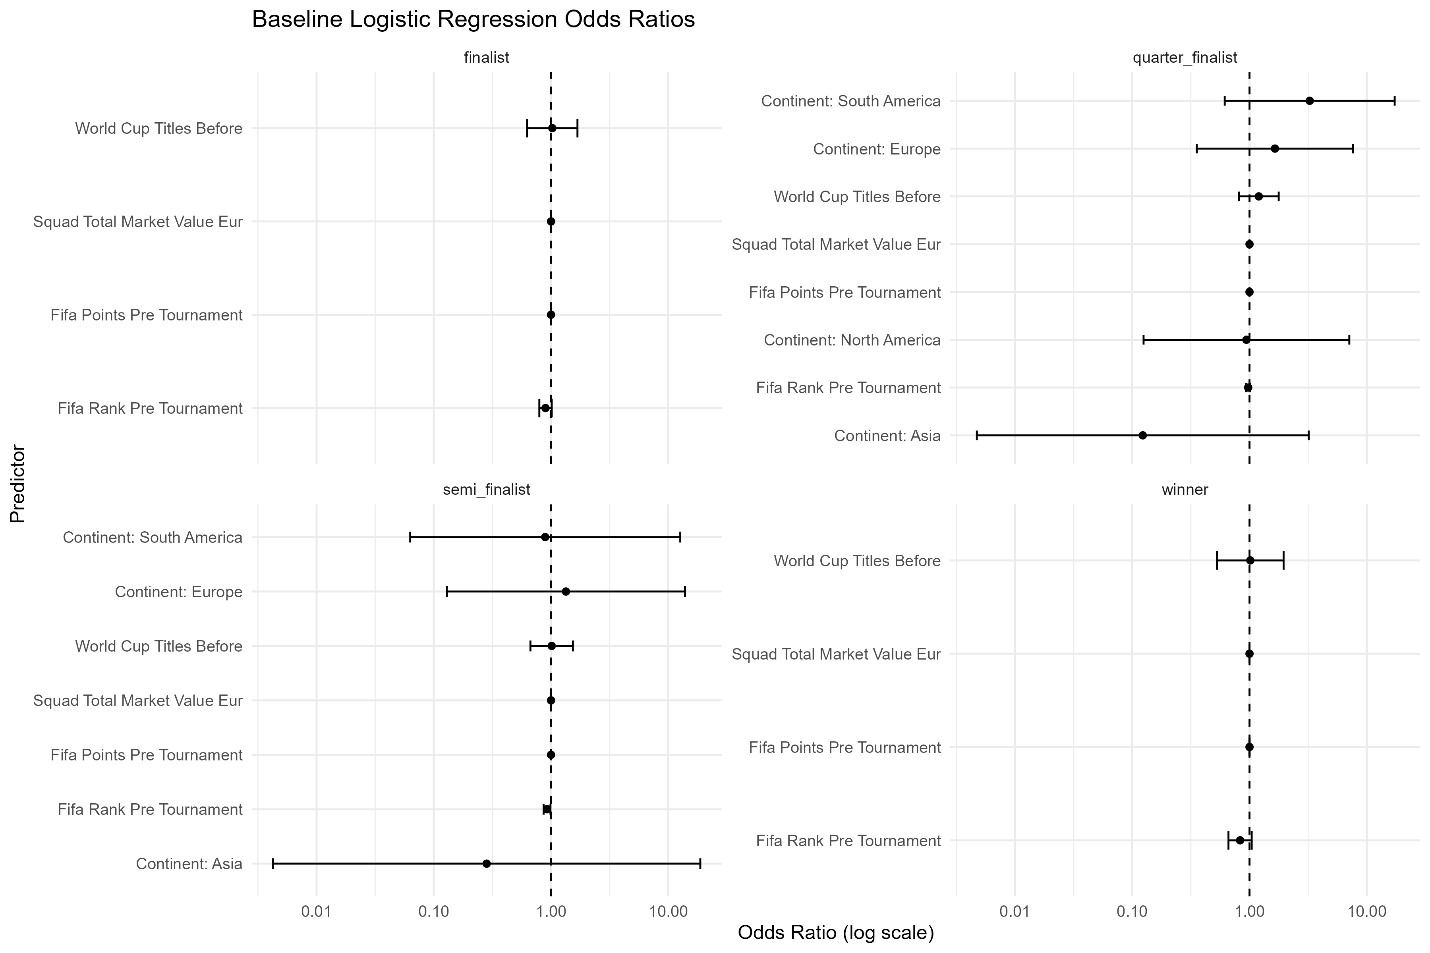

Supplement: Supplementary file 1 [file 72323d193929ce174ec2e560.docx]
